# Supplementary material for: Comprehensive Glycomic and Proteomic Analysis of Mouse Striatum and Lateral Hypothalamus Following Repeated Exposures to Cocaine or Methamphetamine
Source: PubMed Central journal article supplement (PMC11324981; doi:10.1016/j.mcpro.2024.100803), 2024-06-15

# Total Ion Chromatograms (TICs)

# C1- Striatum

RT: 0.00 - 120.01

NL:  
2.68E9  
TIC MS  
C1\_061520  
18\_01

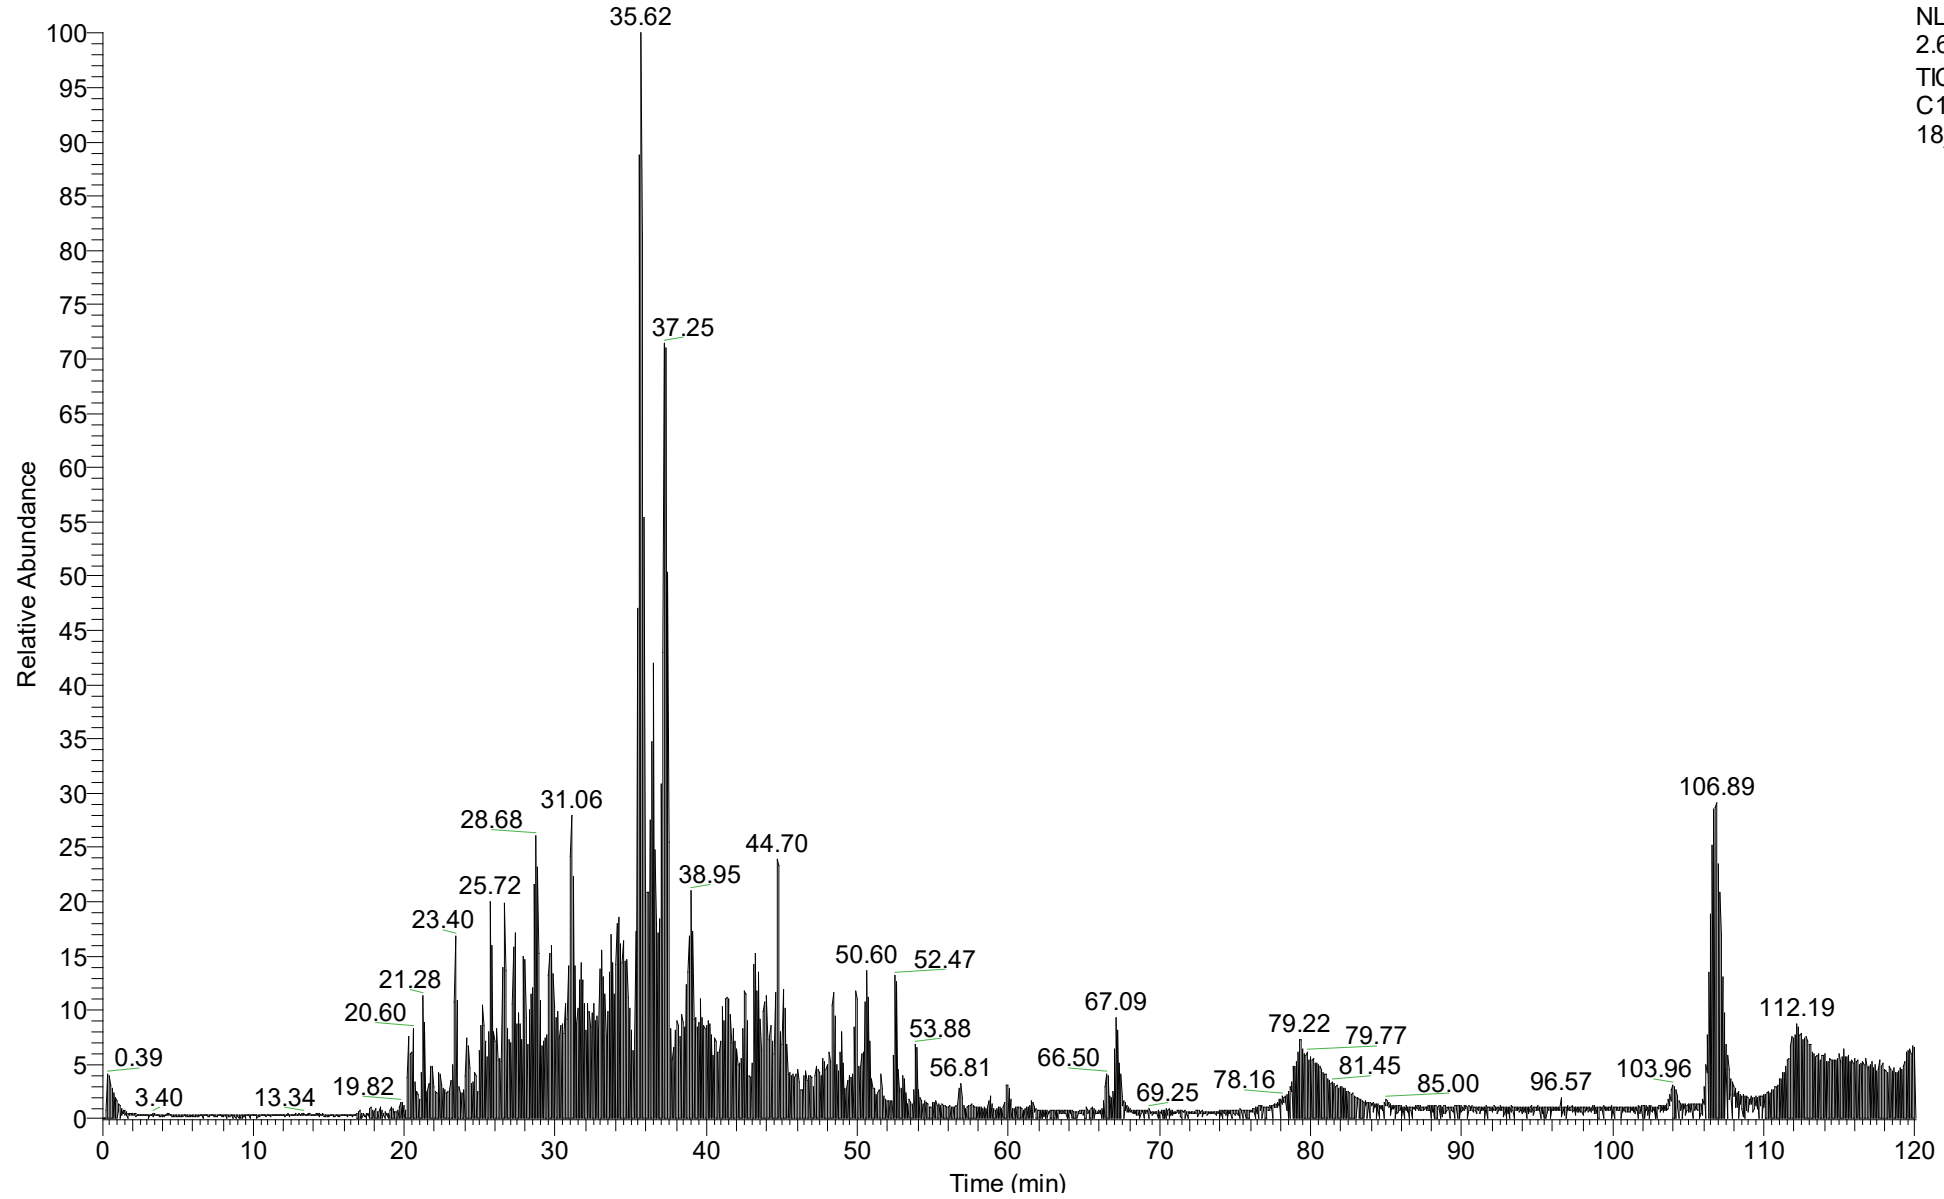

RT: 0.00 - 120.00

# C2- Striatum

NL:  
2.47E9  
TIC MS  
C2\_06152  
18\_01

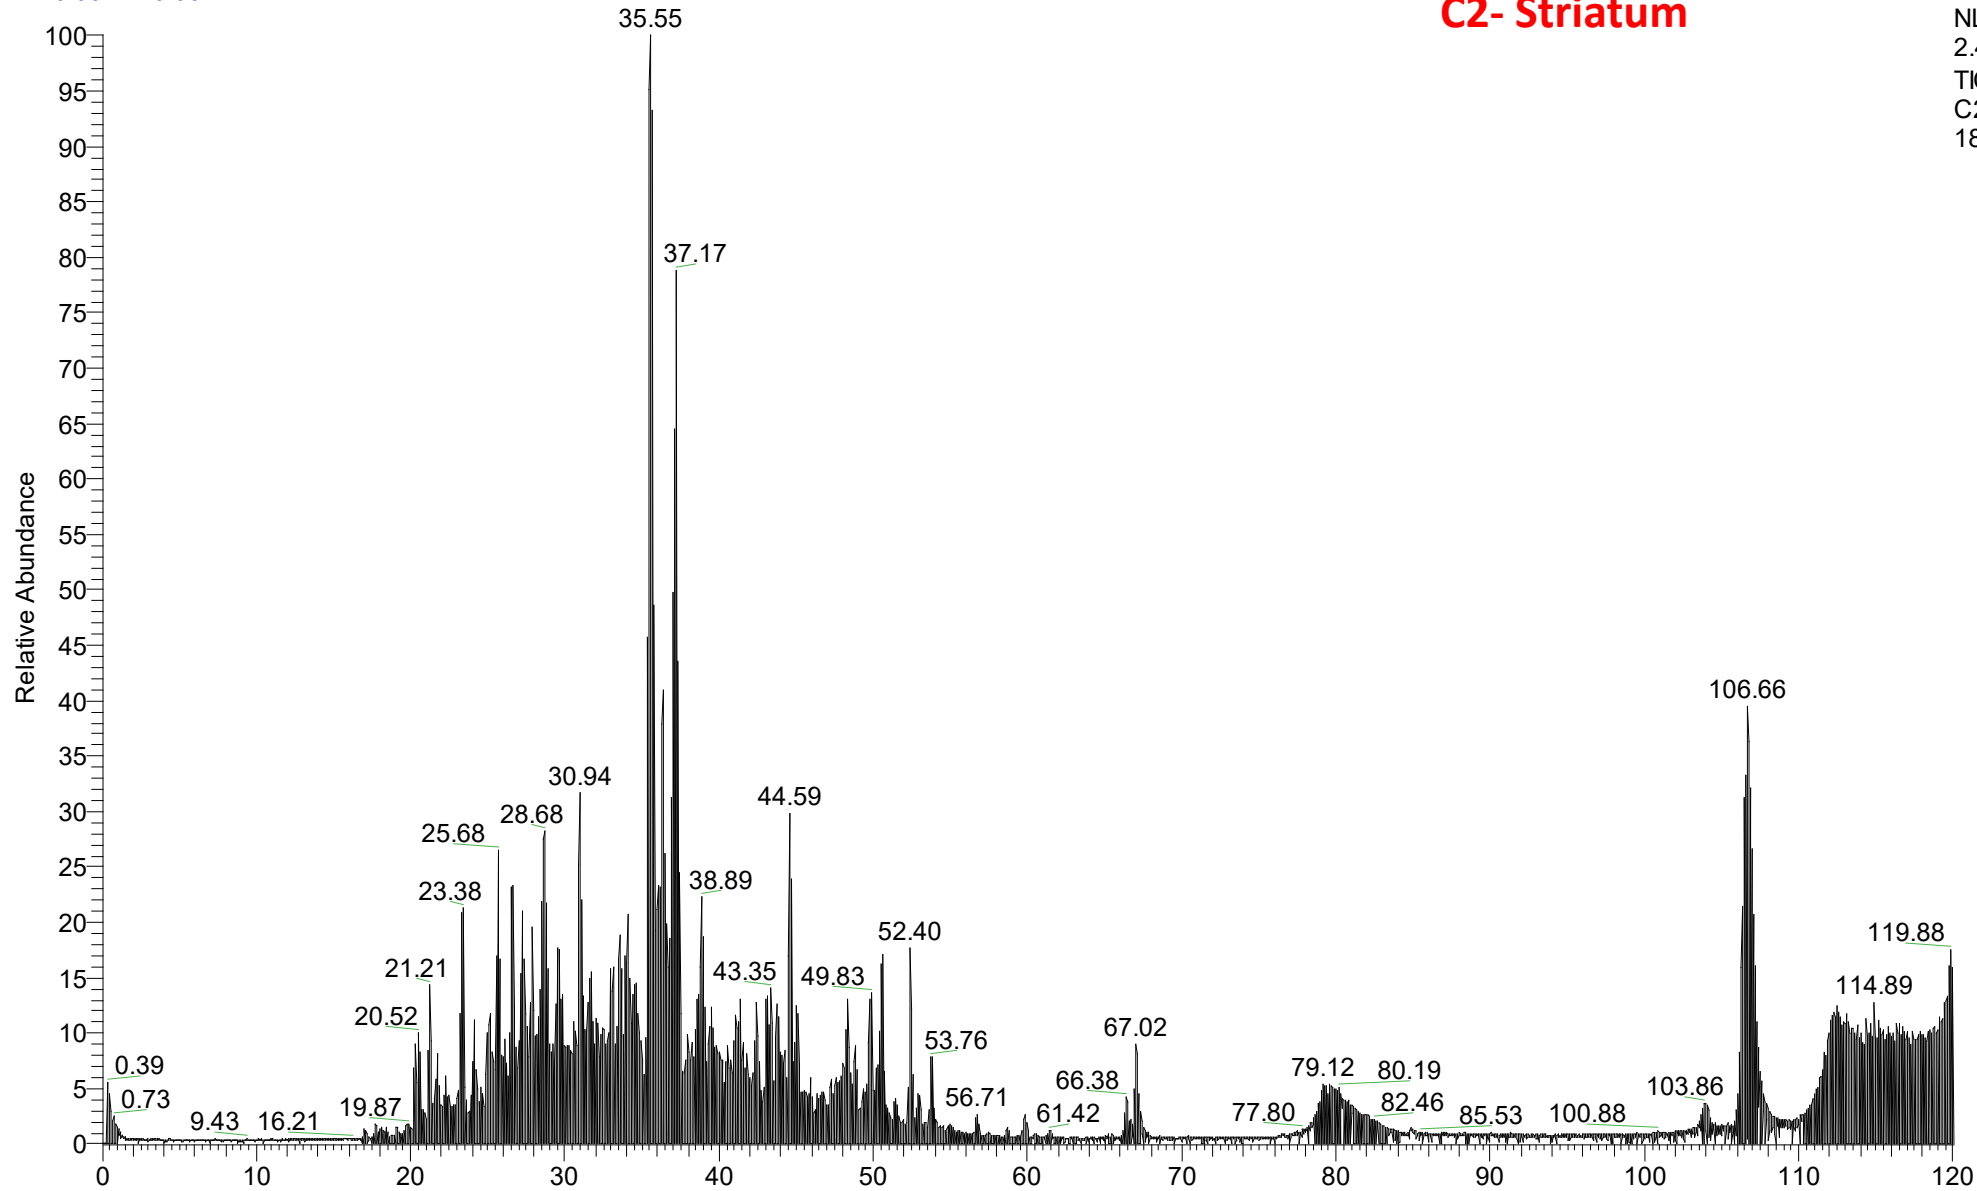

RT: 0.00 - 120.01

# C3- Striatum

NL:  
3.12E9  
TIC MS  
C3\_061520  
18\_01

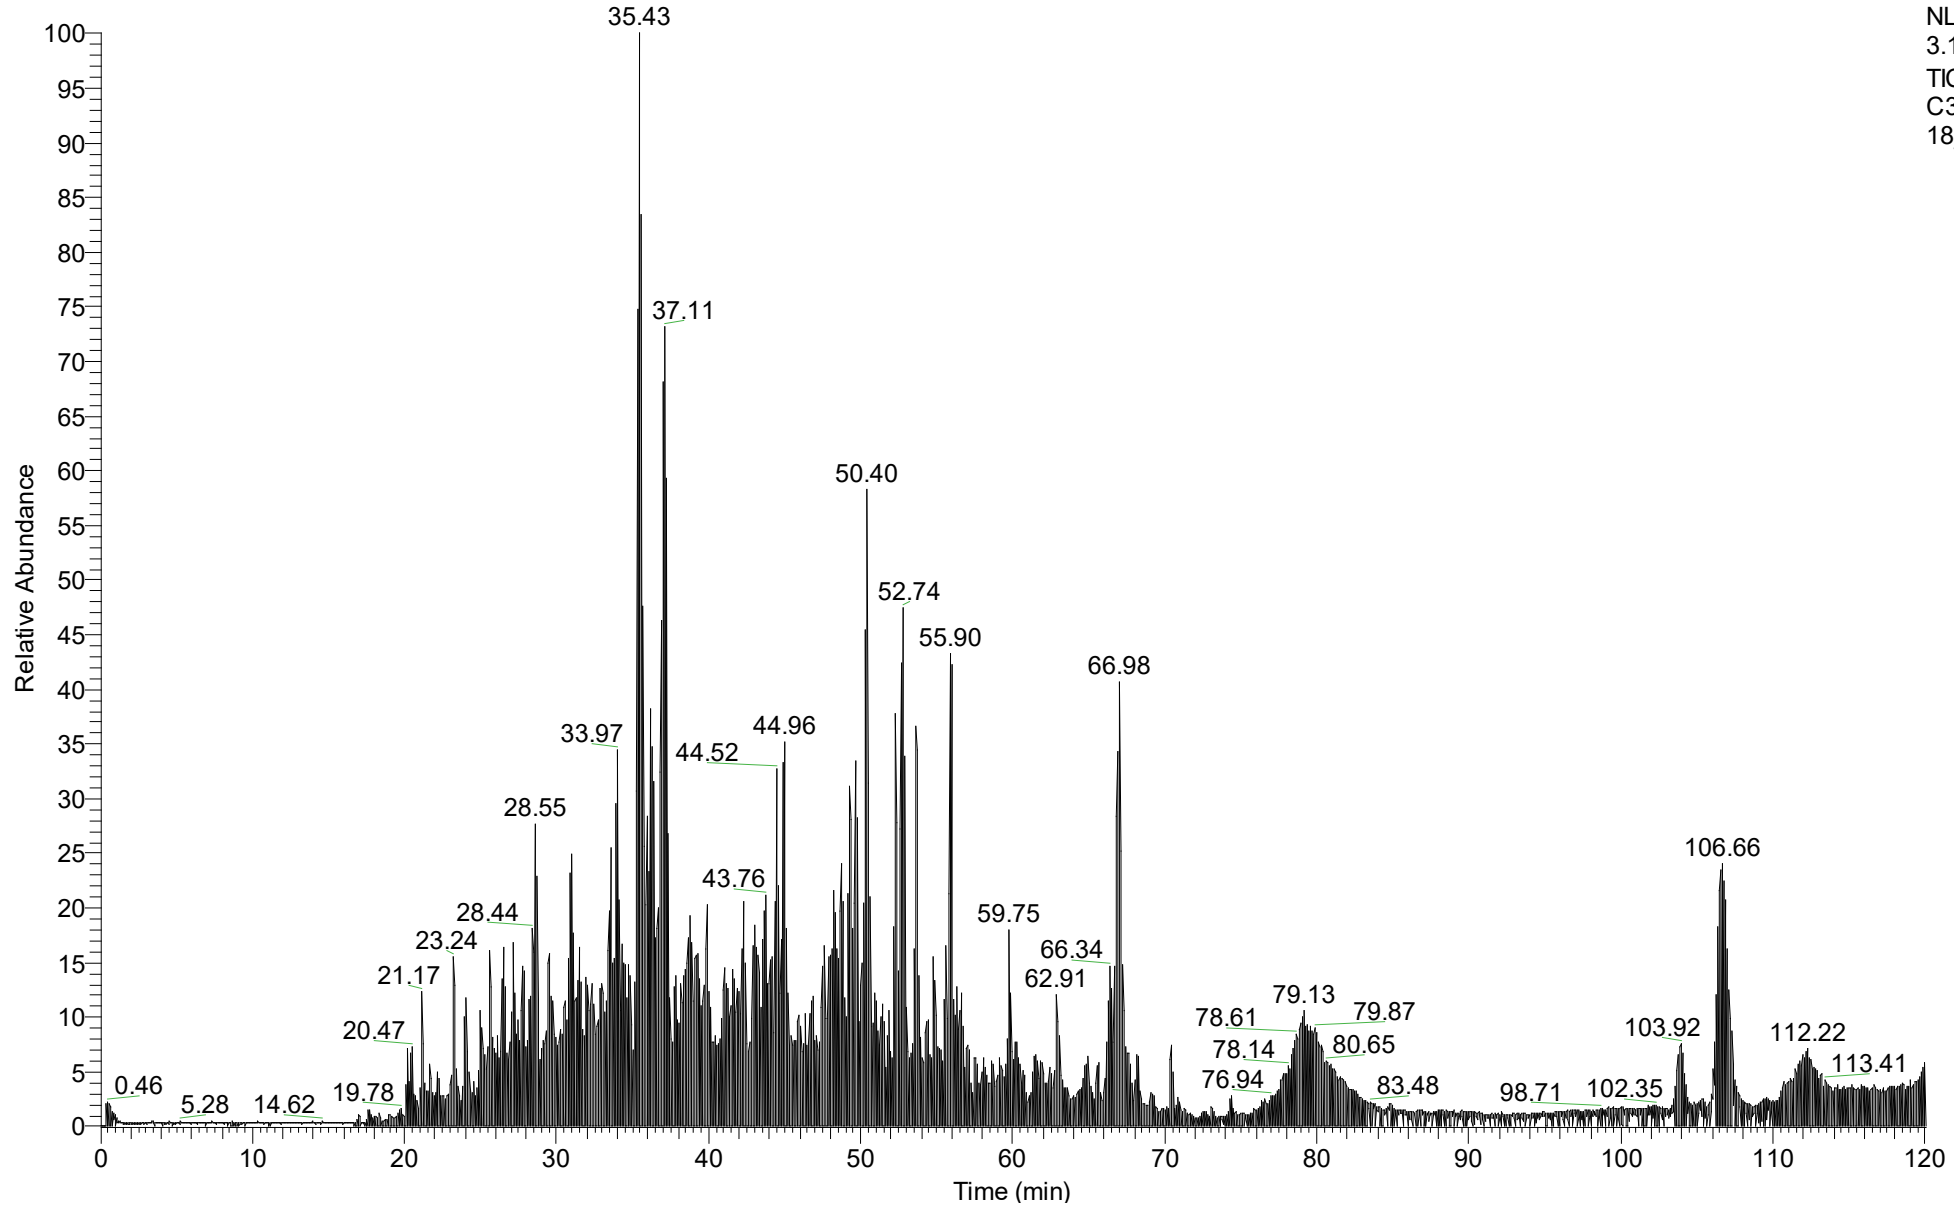

RT: 0.00 - 120.00

# C4- Striatum

NL:  
2.31E9  
TIC MS  
C4\_061520  
18\_01

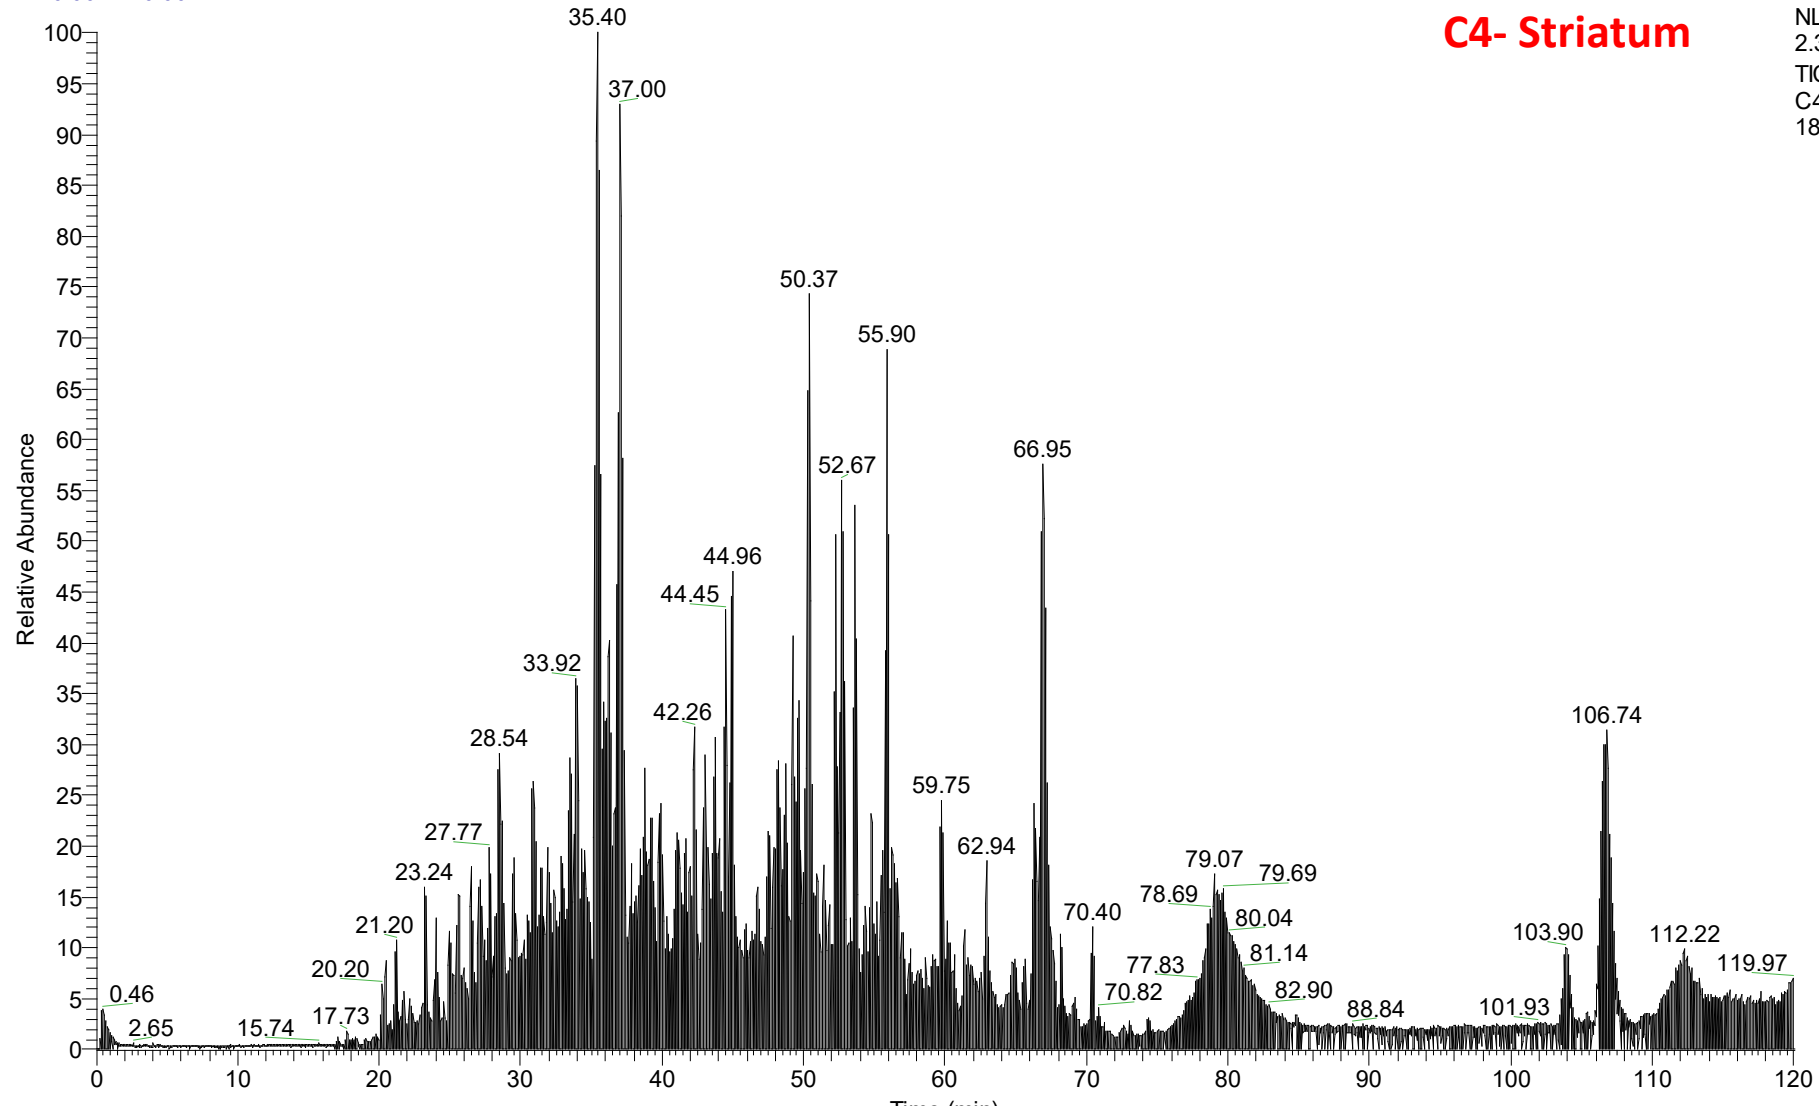

RT: 0.00 - 120.00

# C5- Striatum

NL:  
2.79E9  
TIC MS  
C5\_061520  
18\_01

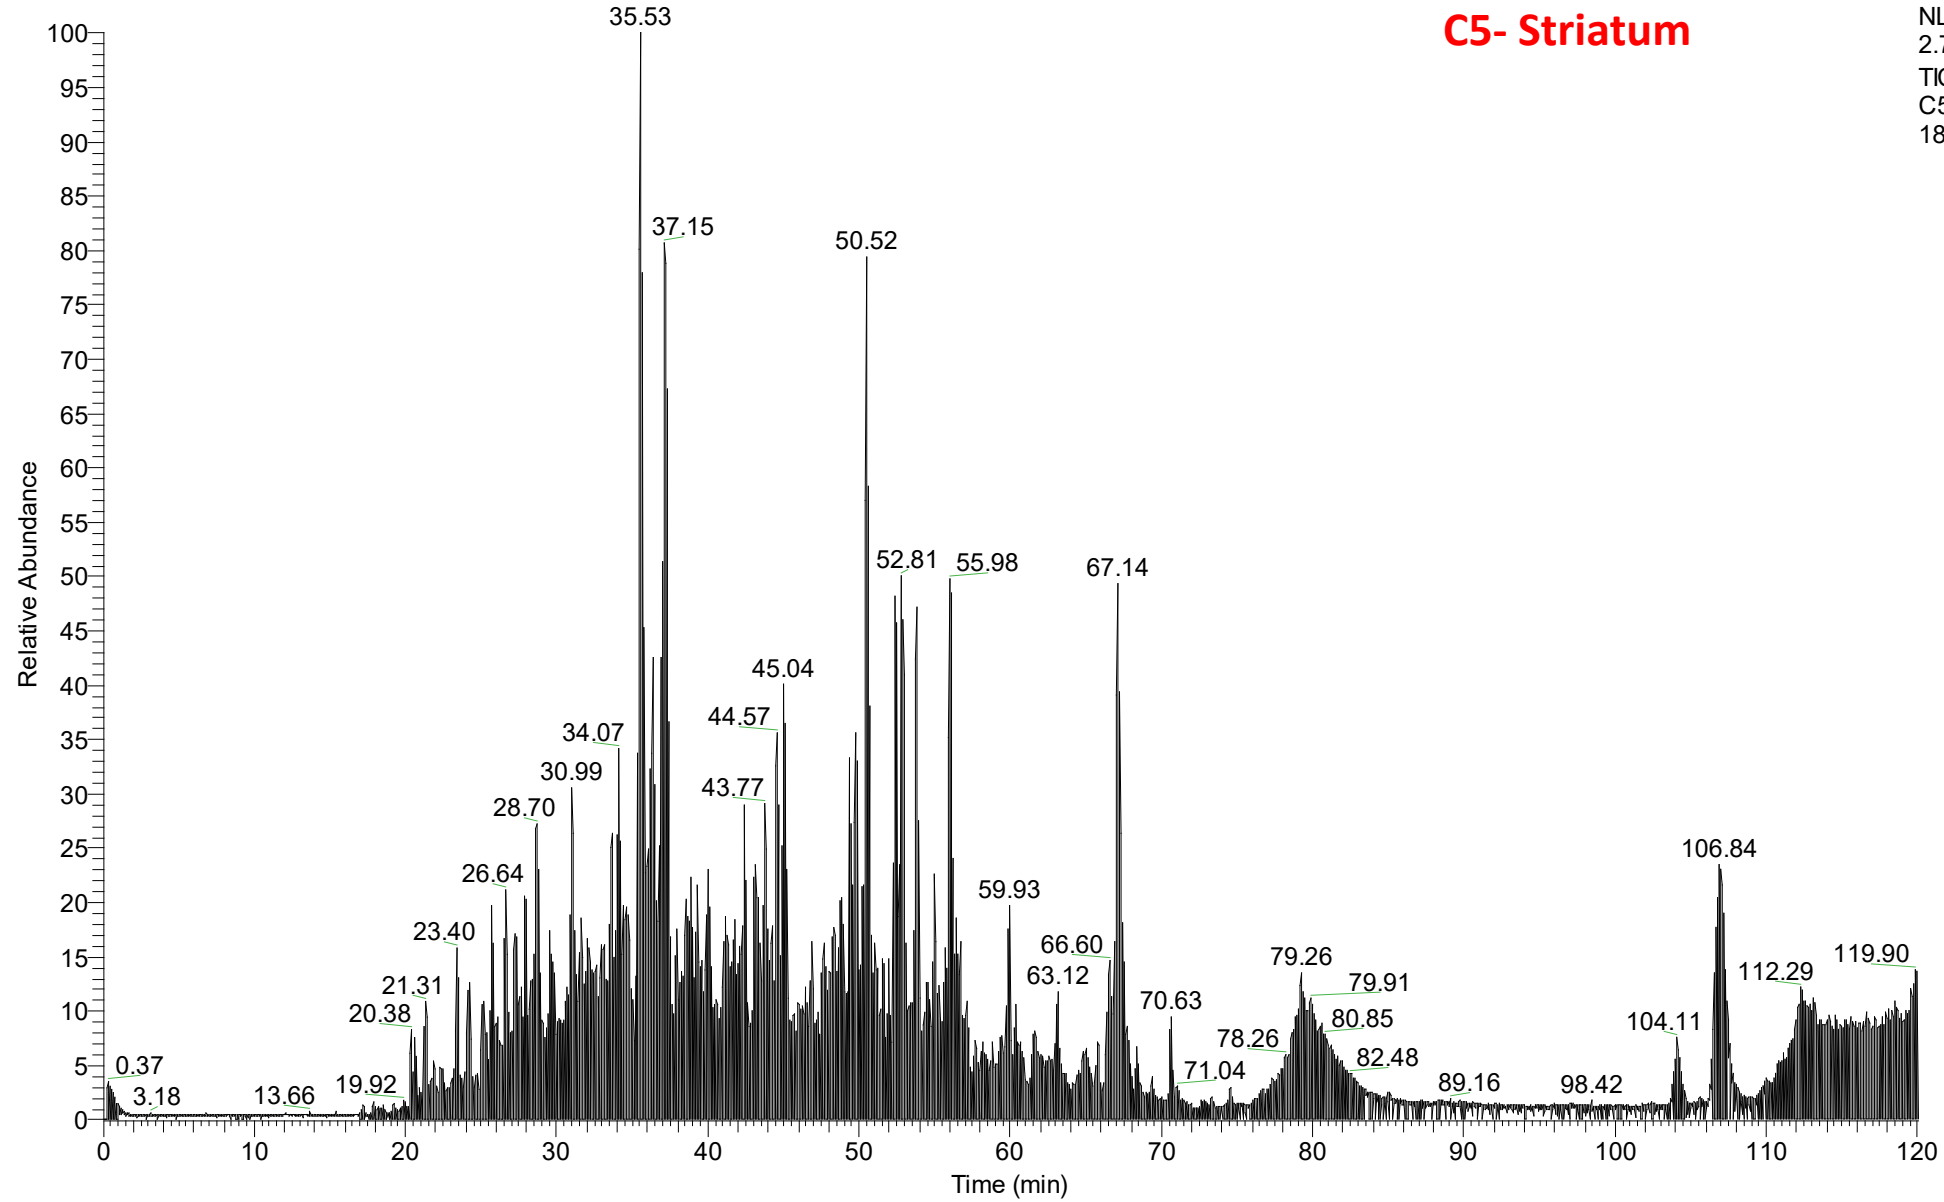

RT: 0.00 - 120.00

# C6- Striatum

NL:  
2.66E9  
TIC MS  
C6\_061520  
18\_01

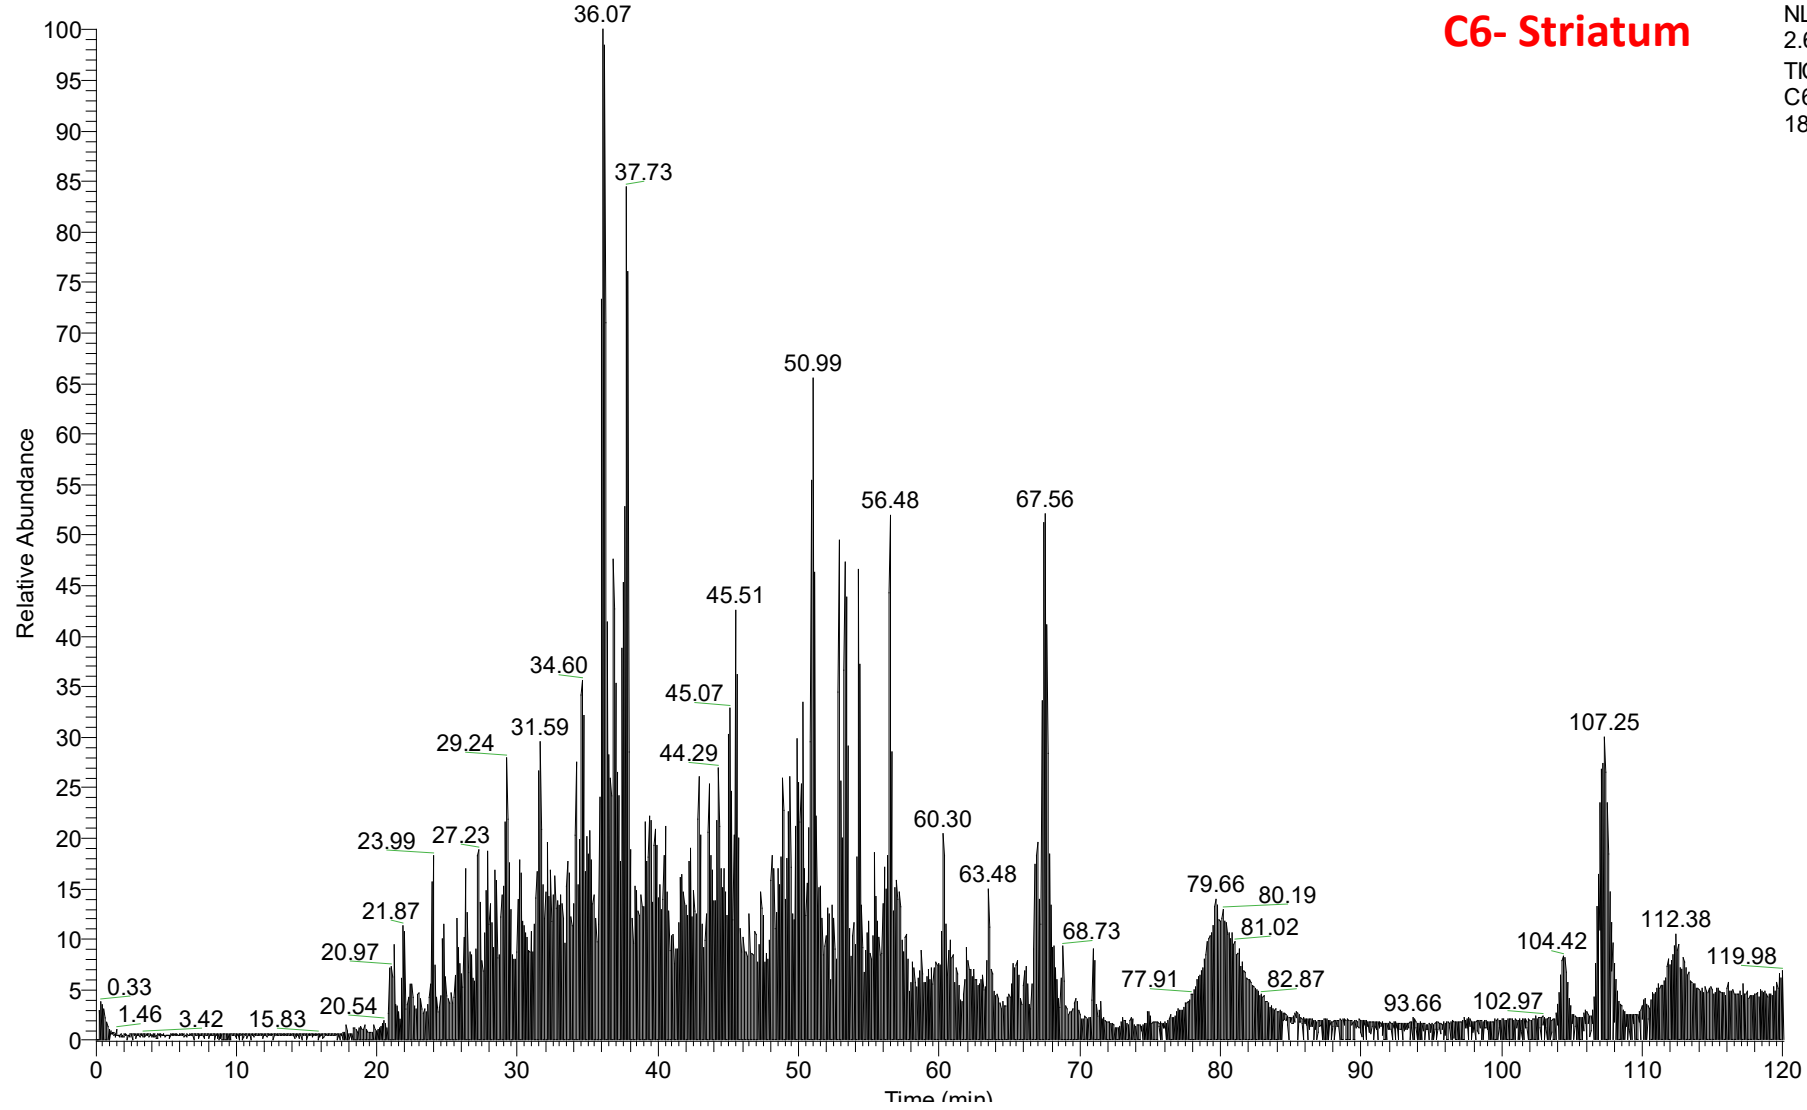

RT: 0.00 - 120.00

# M1- Striatum

NL:  
2.58E9  
TIC MS  
M1\_06152  
018\_01

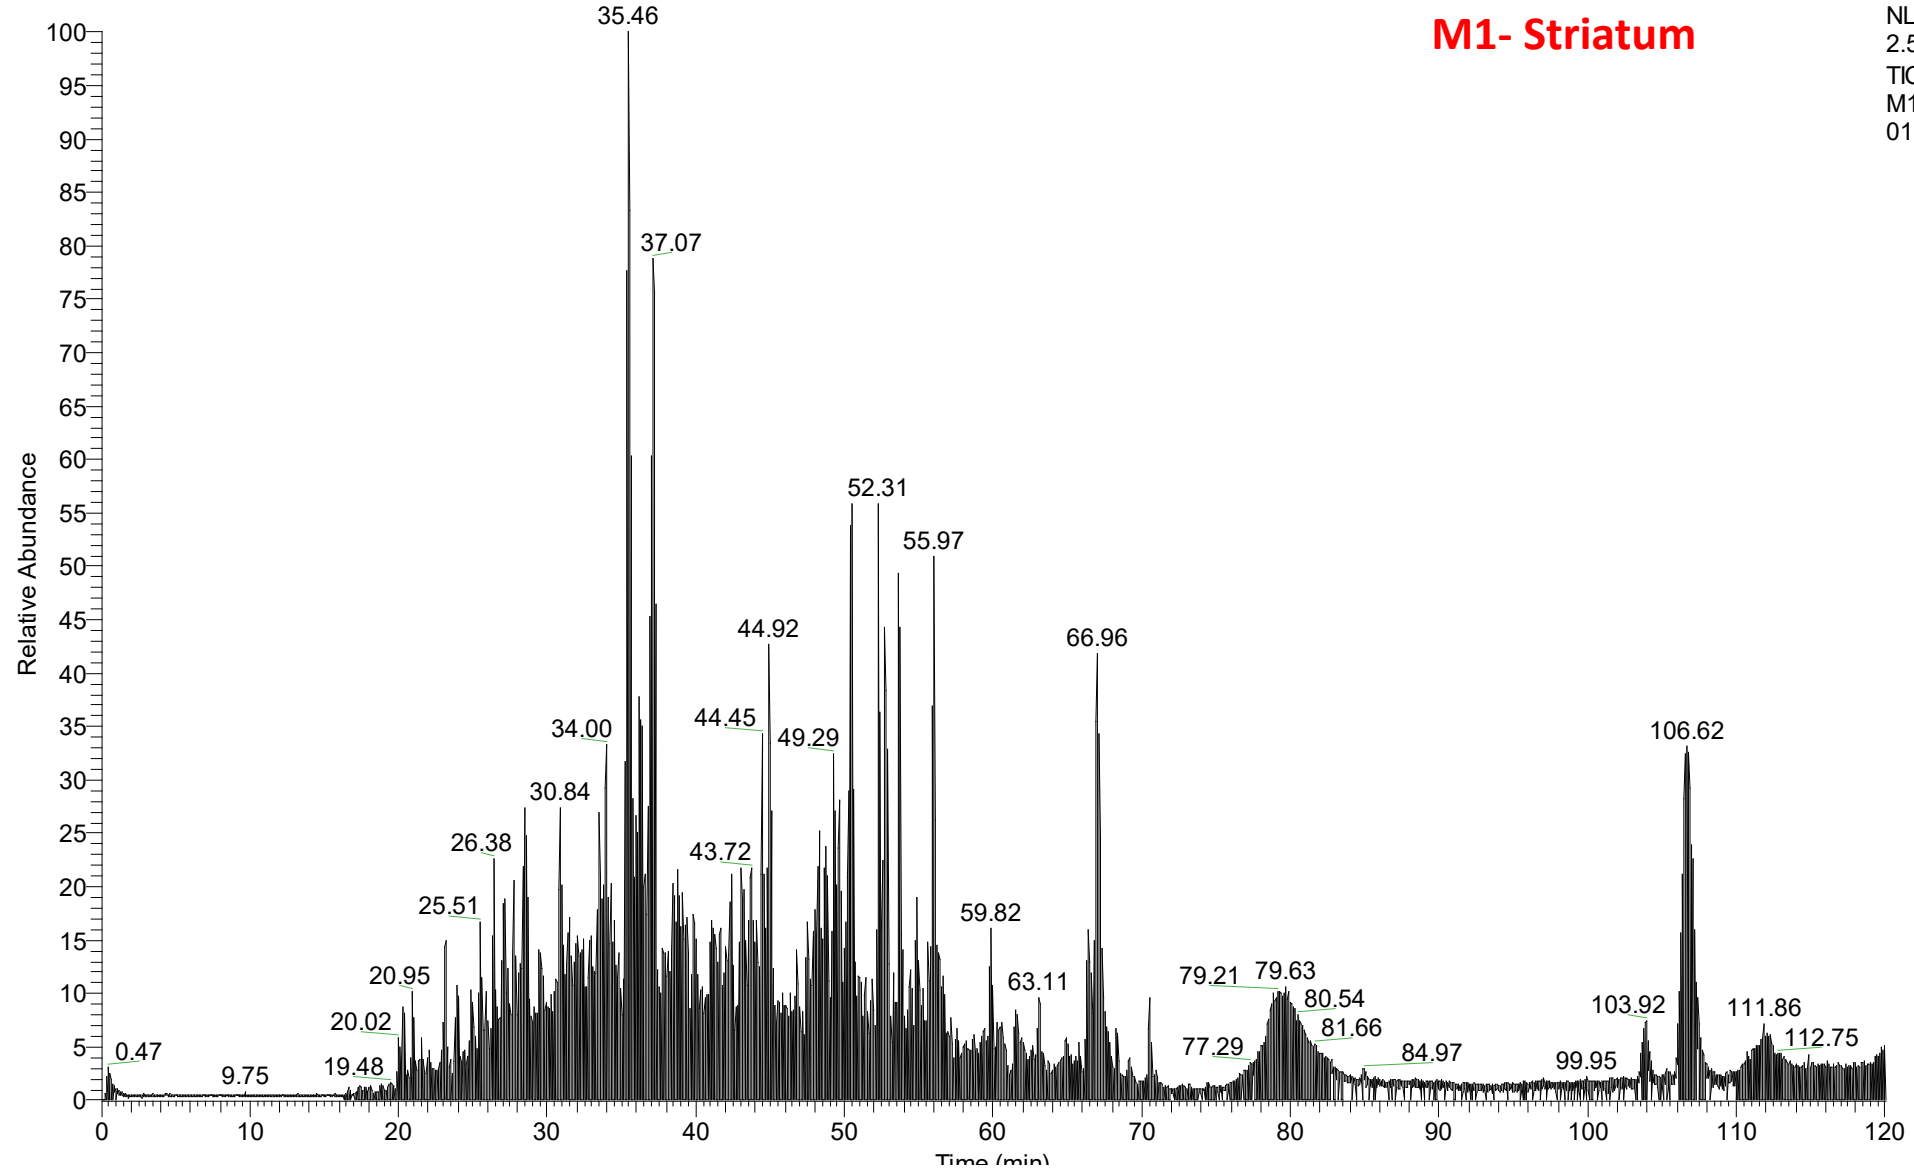



RT: 0.00 - 120.01

# M2- Striatum

NL:  
2.46E9  
TIC MS  
M2\_06152  
018\_01

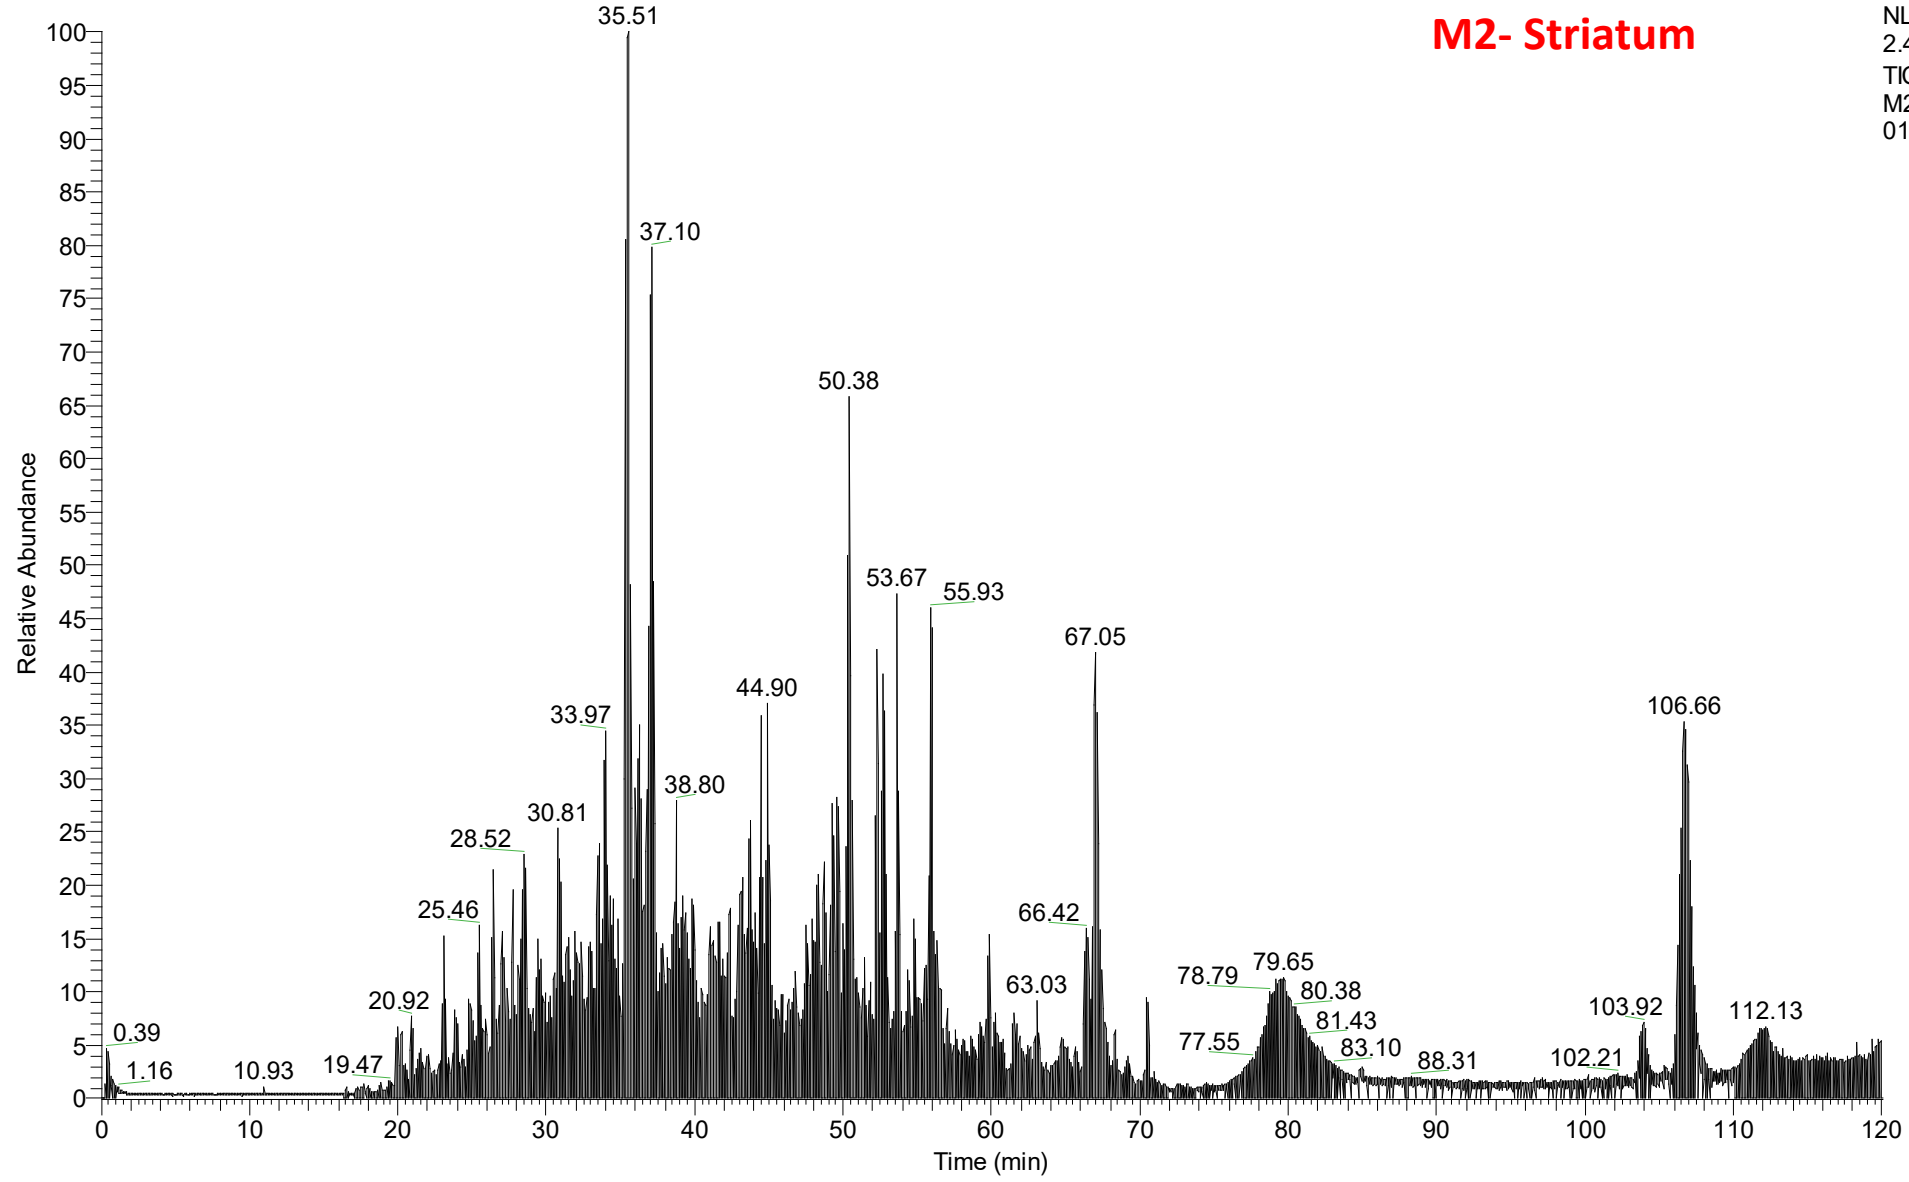

RT: 0.00 - 120.01

# M3- Striatum

NL:  
3.73E9  
TIC MS  
M3\_06152  
018\_01

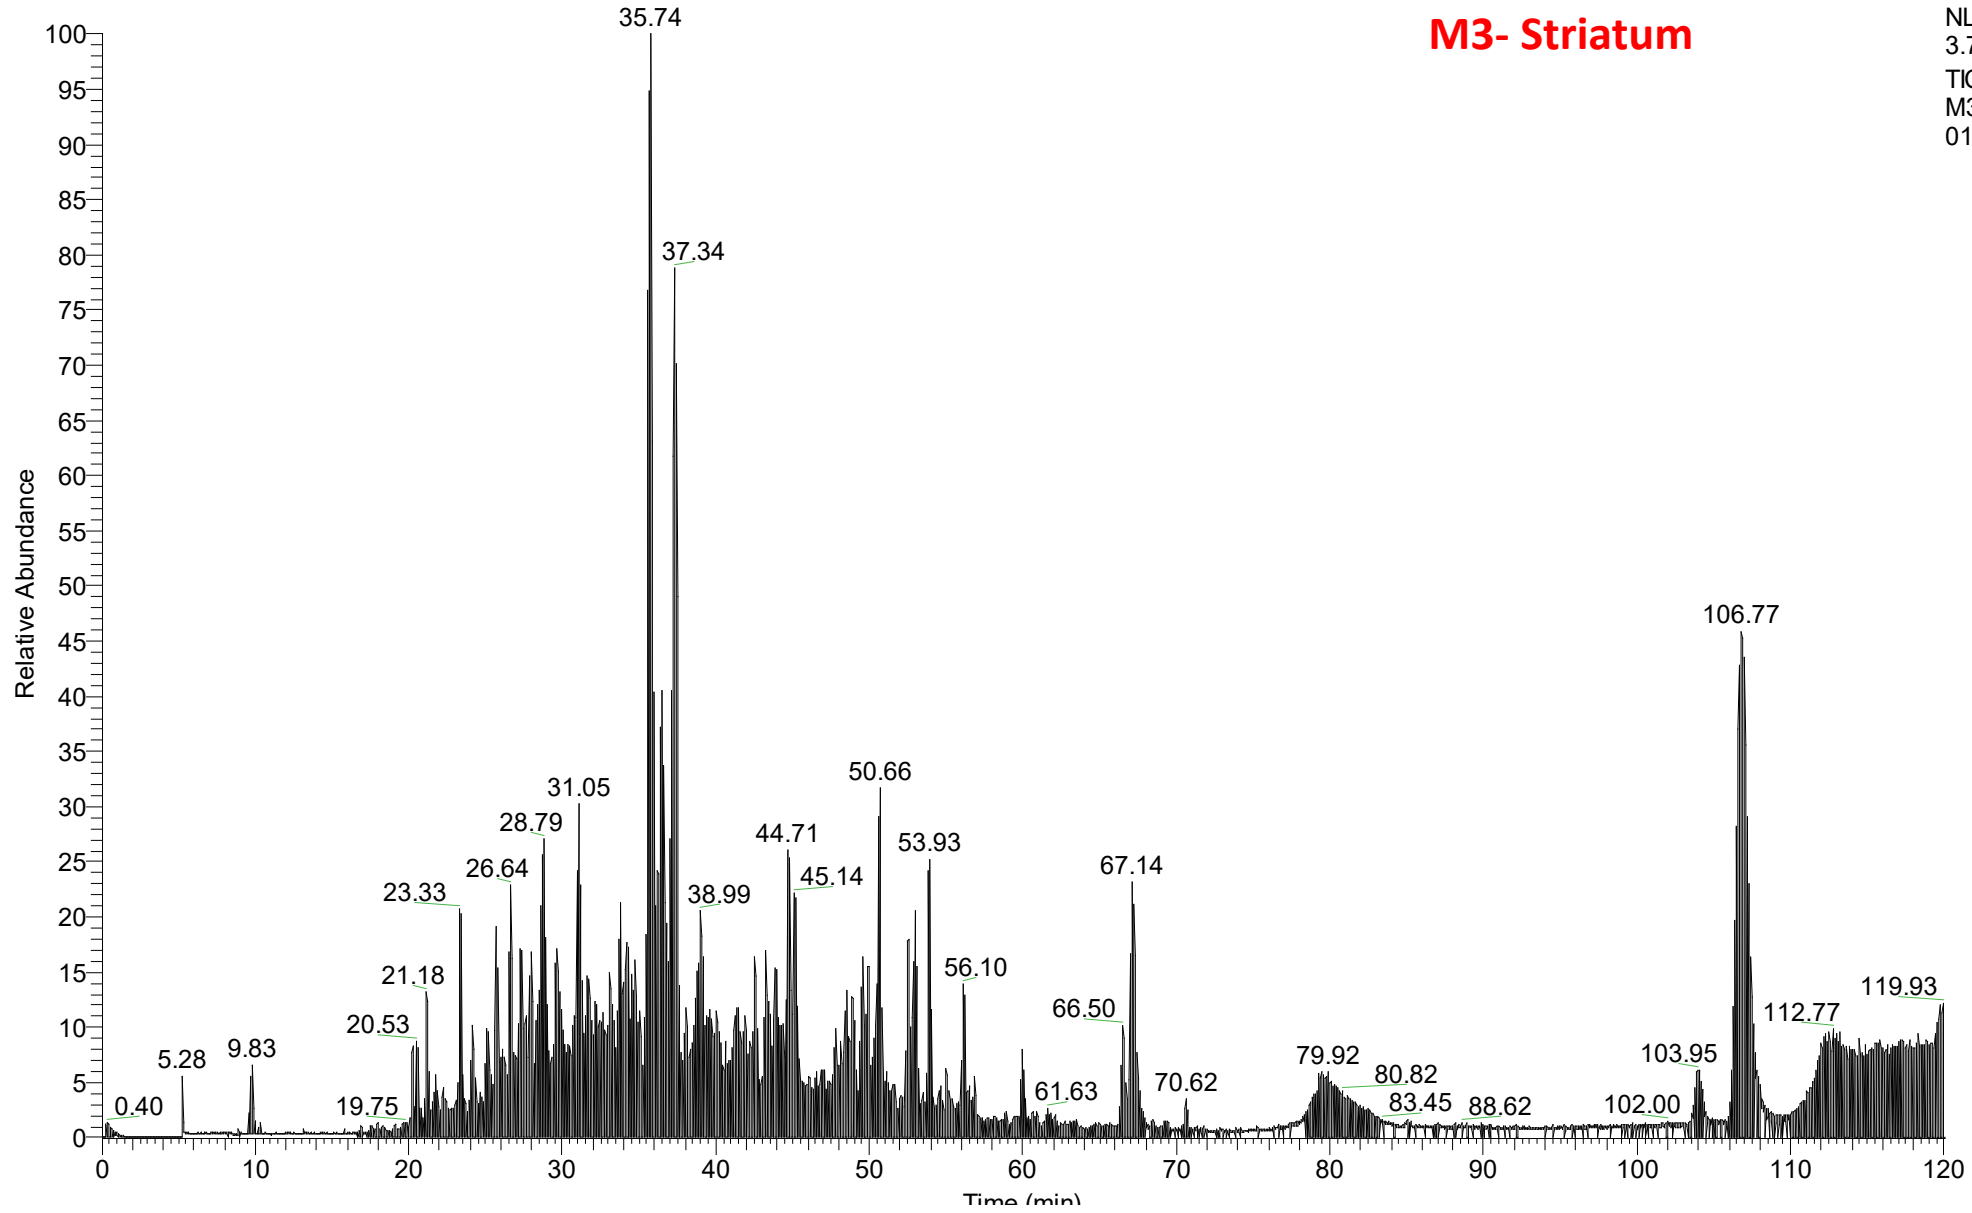

RT: 0.00 - 120.00

# M4- Striatum

NL:  
3.67E9  
TIC MS  
M4\_06152  
018\_01

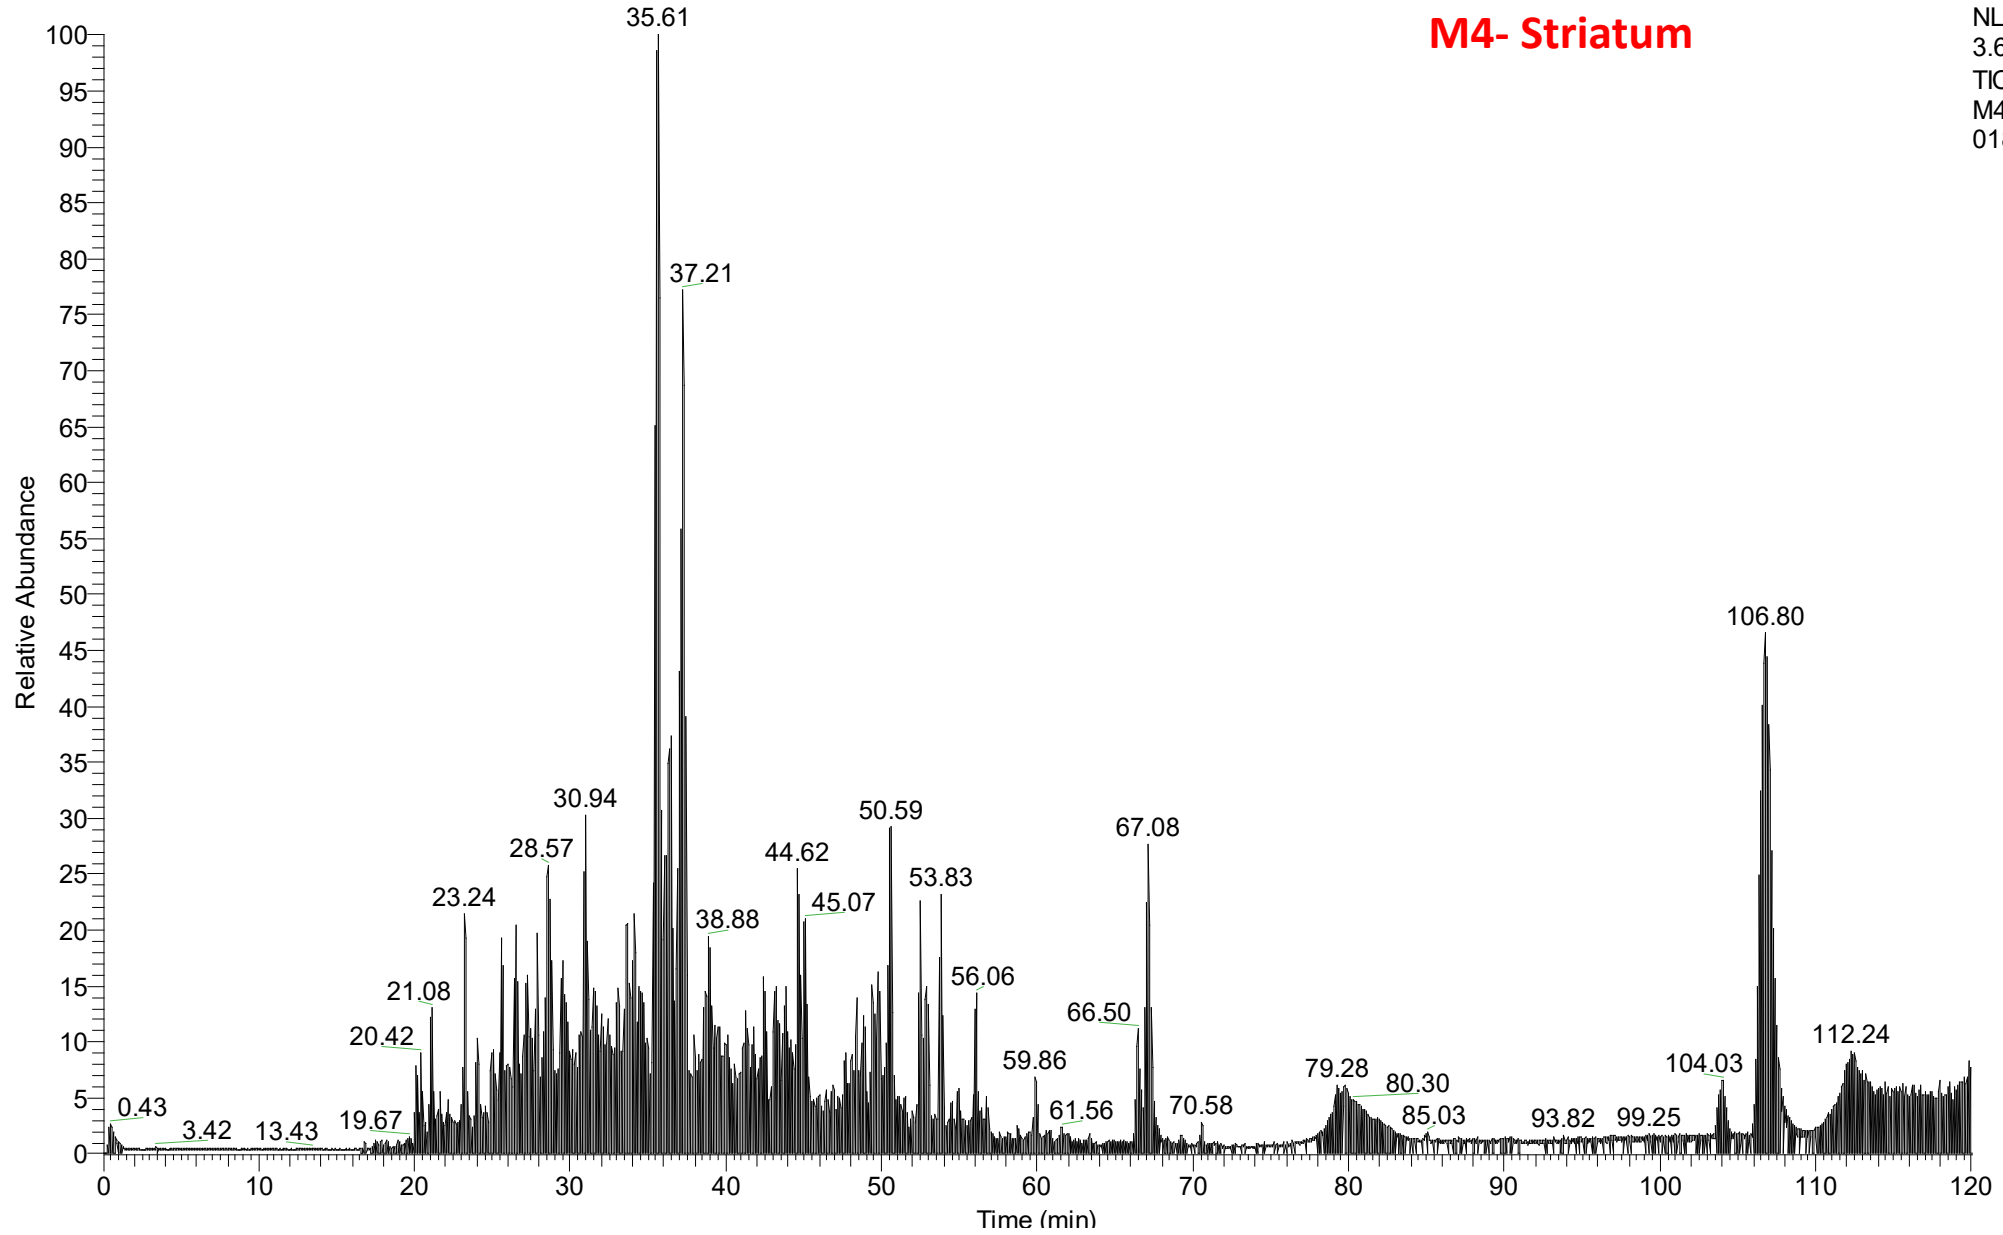

RT: 0.00 - 120.01

# M5- Striatum

NL:  
4.06E9  
TIC MS  
M5\_06152  
018\_01

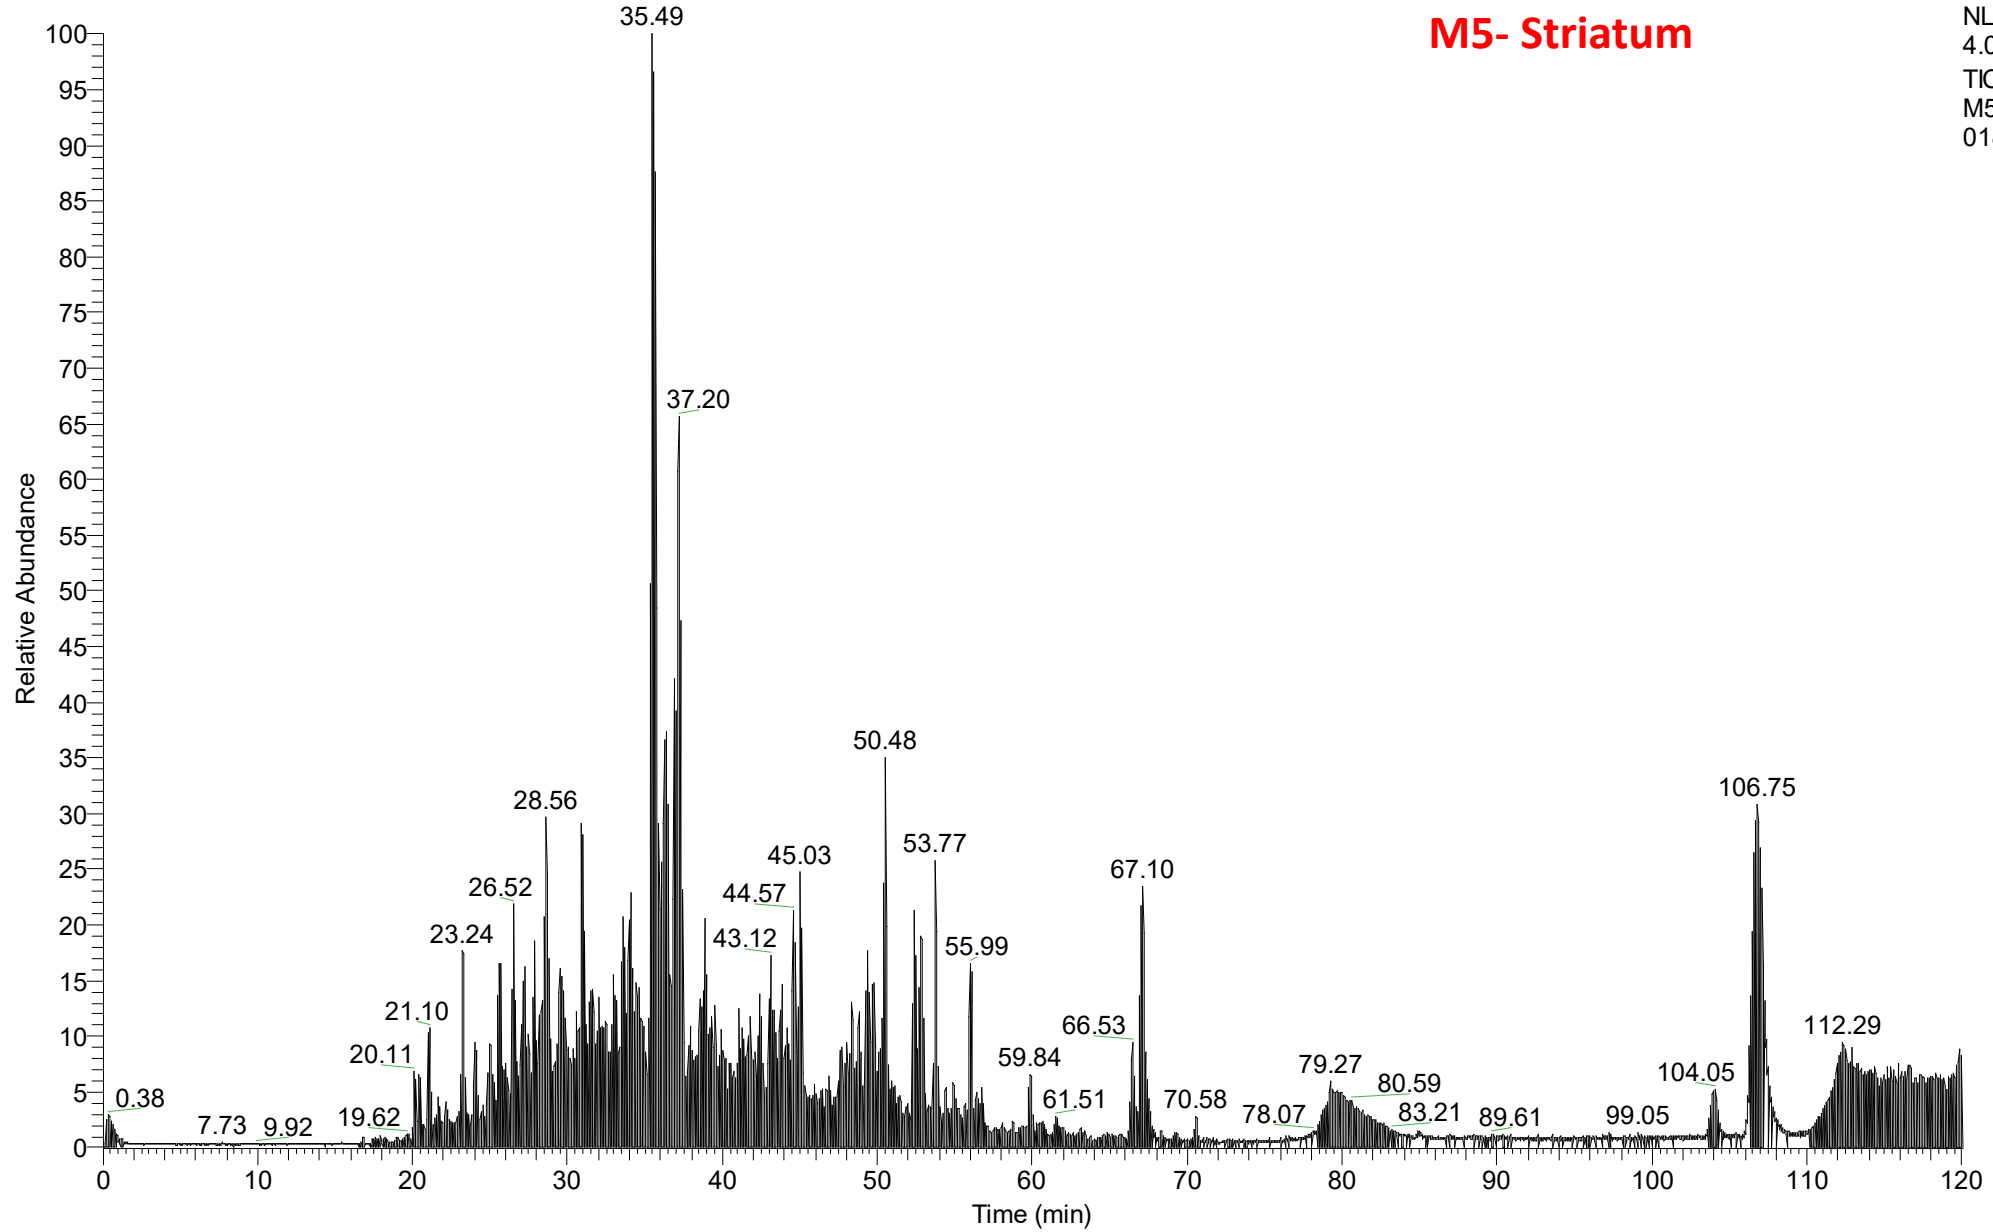

RT: 0.00 - 120.00

# M6- Striatum

NL:  
3.58E9  
TIC MS  
M6\_06152  
018\_01

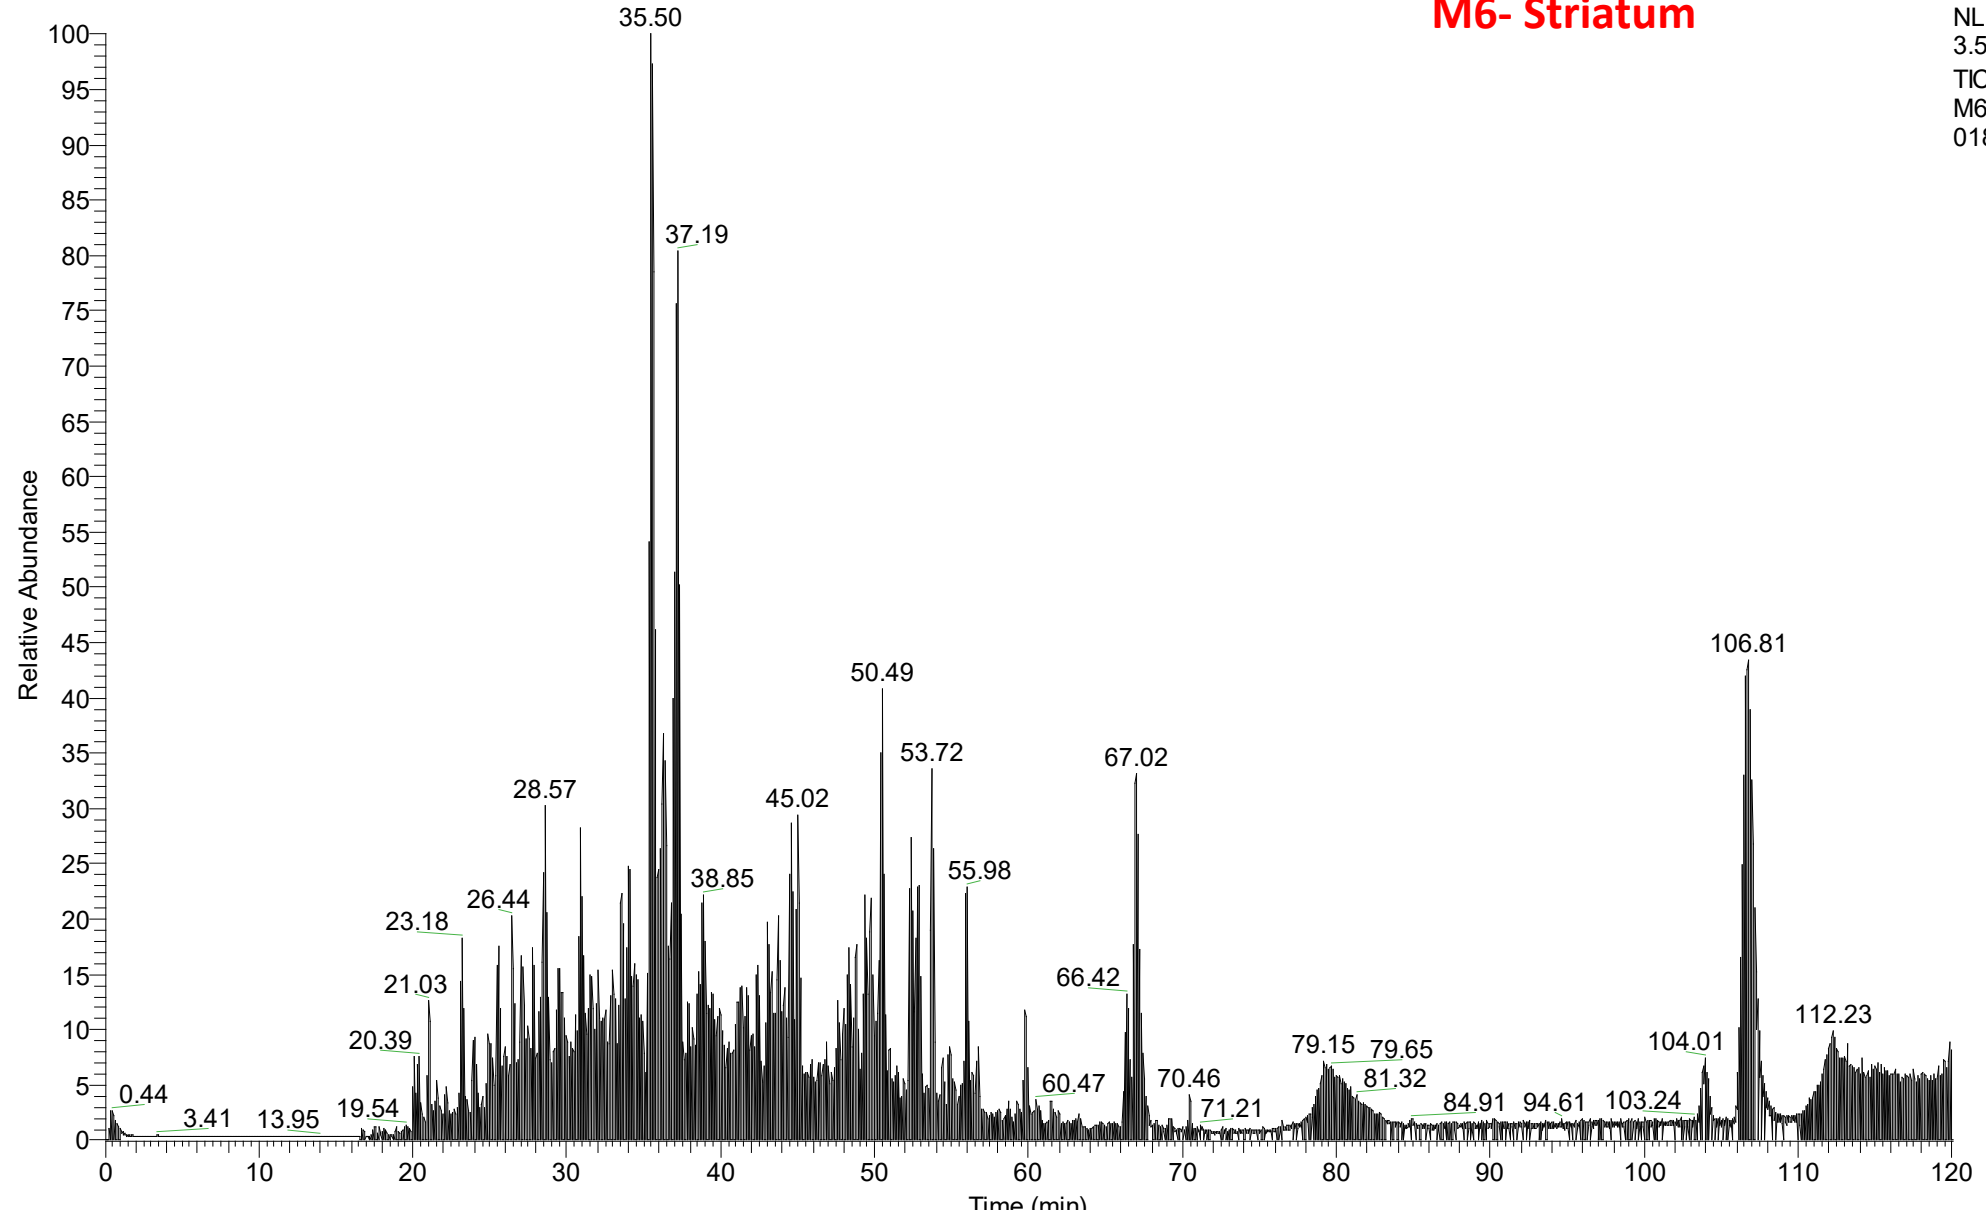

# S1- Striatum

RT: 0.00 - 120.01

NL:  
3.07E9  
TIC MS  
S1\_061520  
18\_01

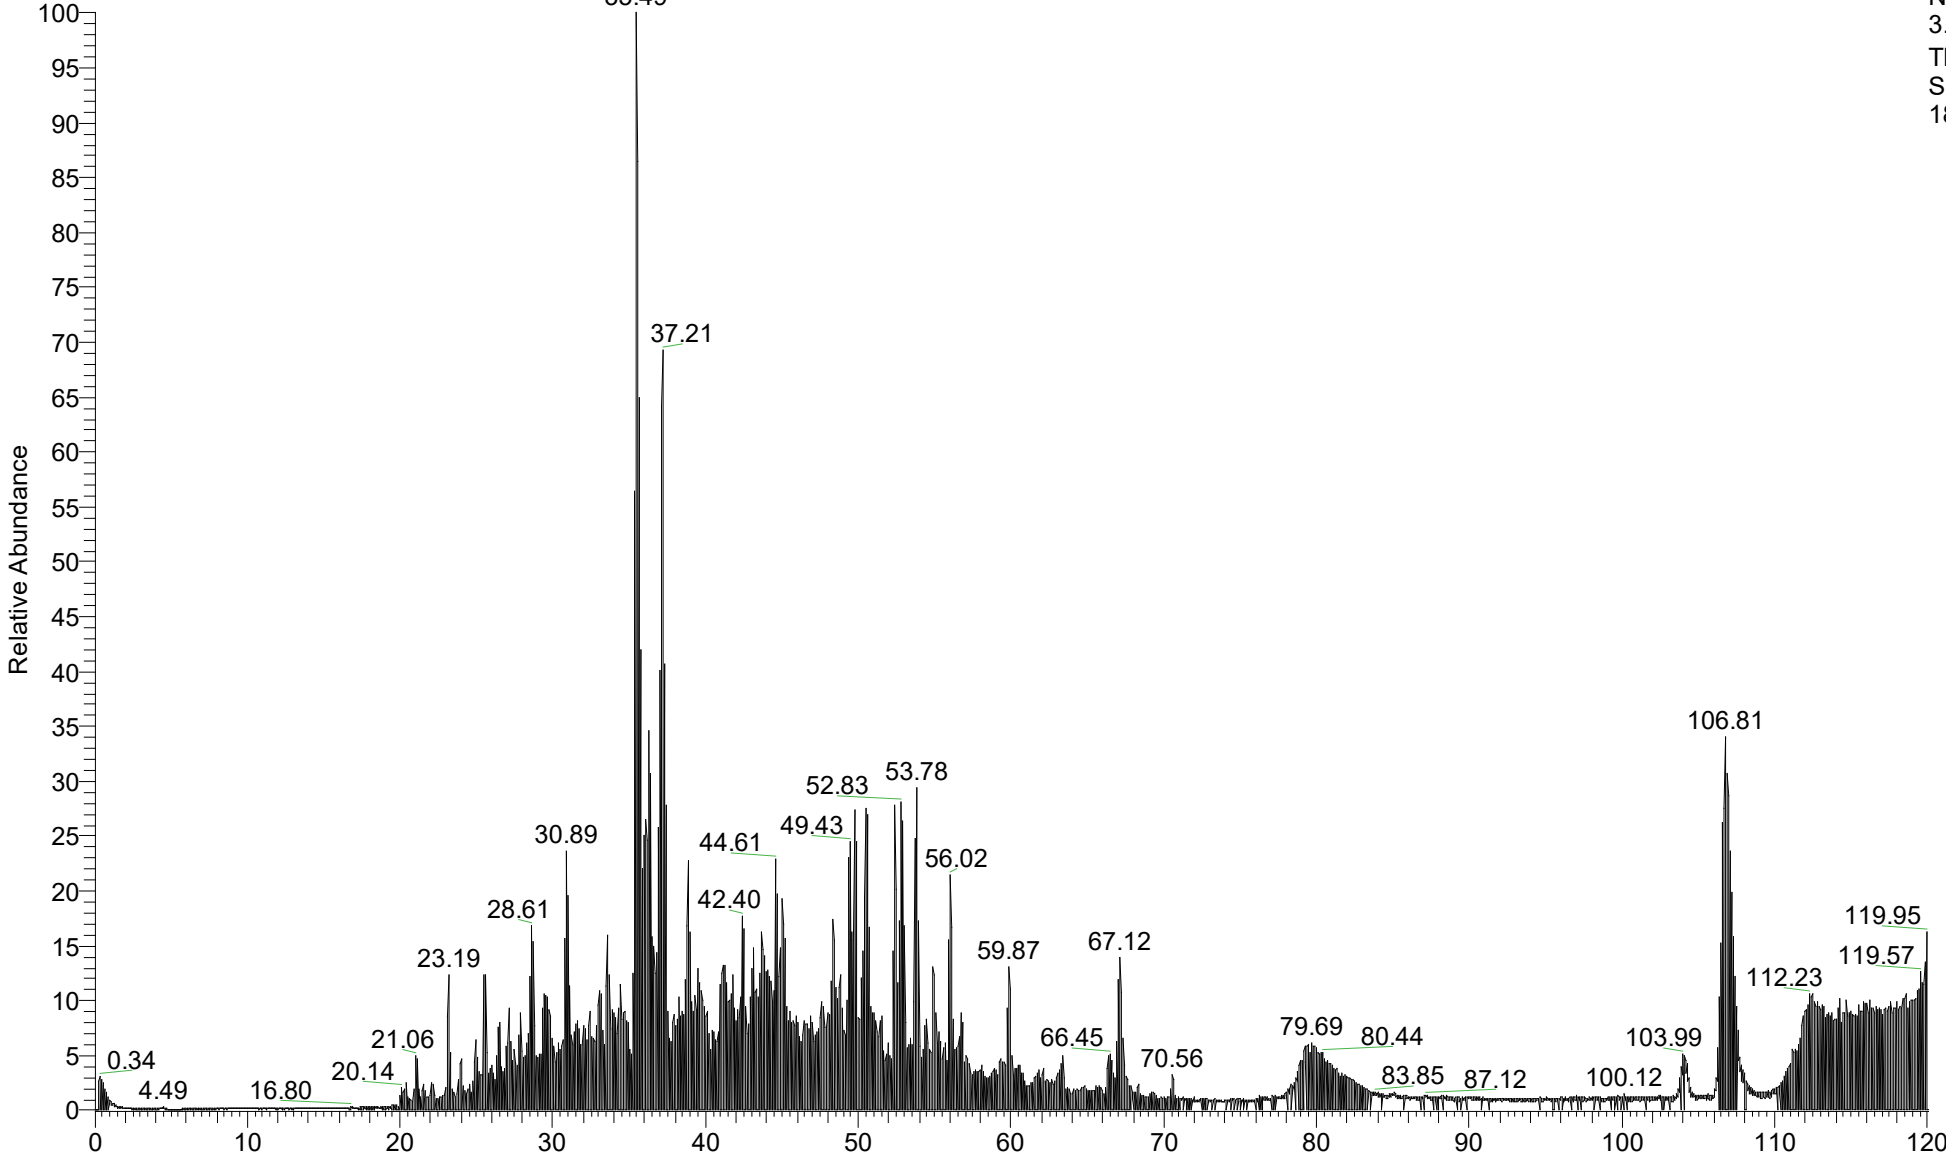

RT: 0.00 - 120.00

# S2- Striatum

NL:  
3.33E9  
TIC M:  
S2\_06  
18\_01

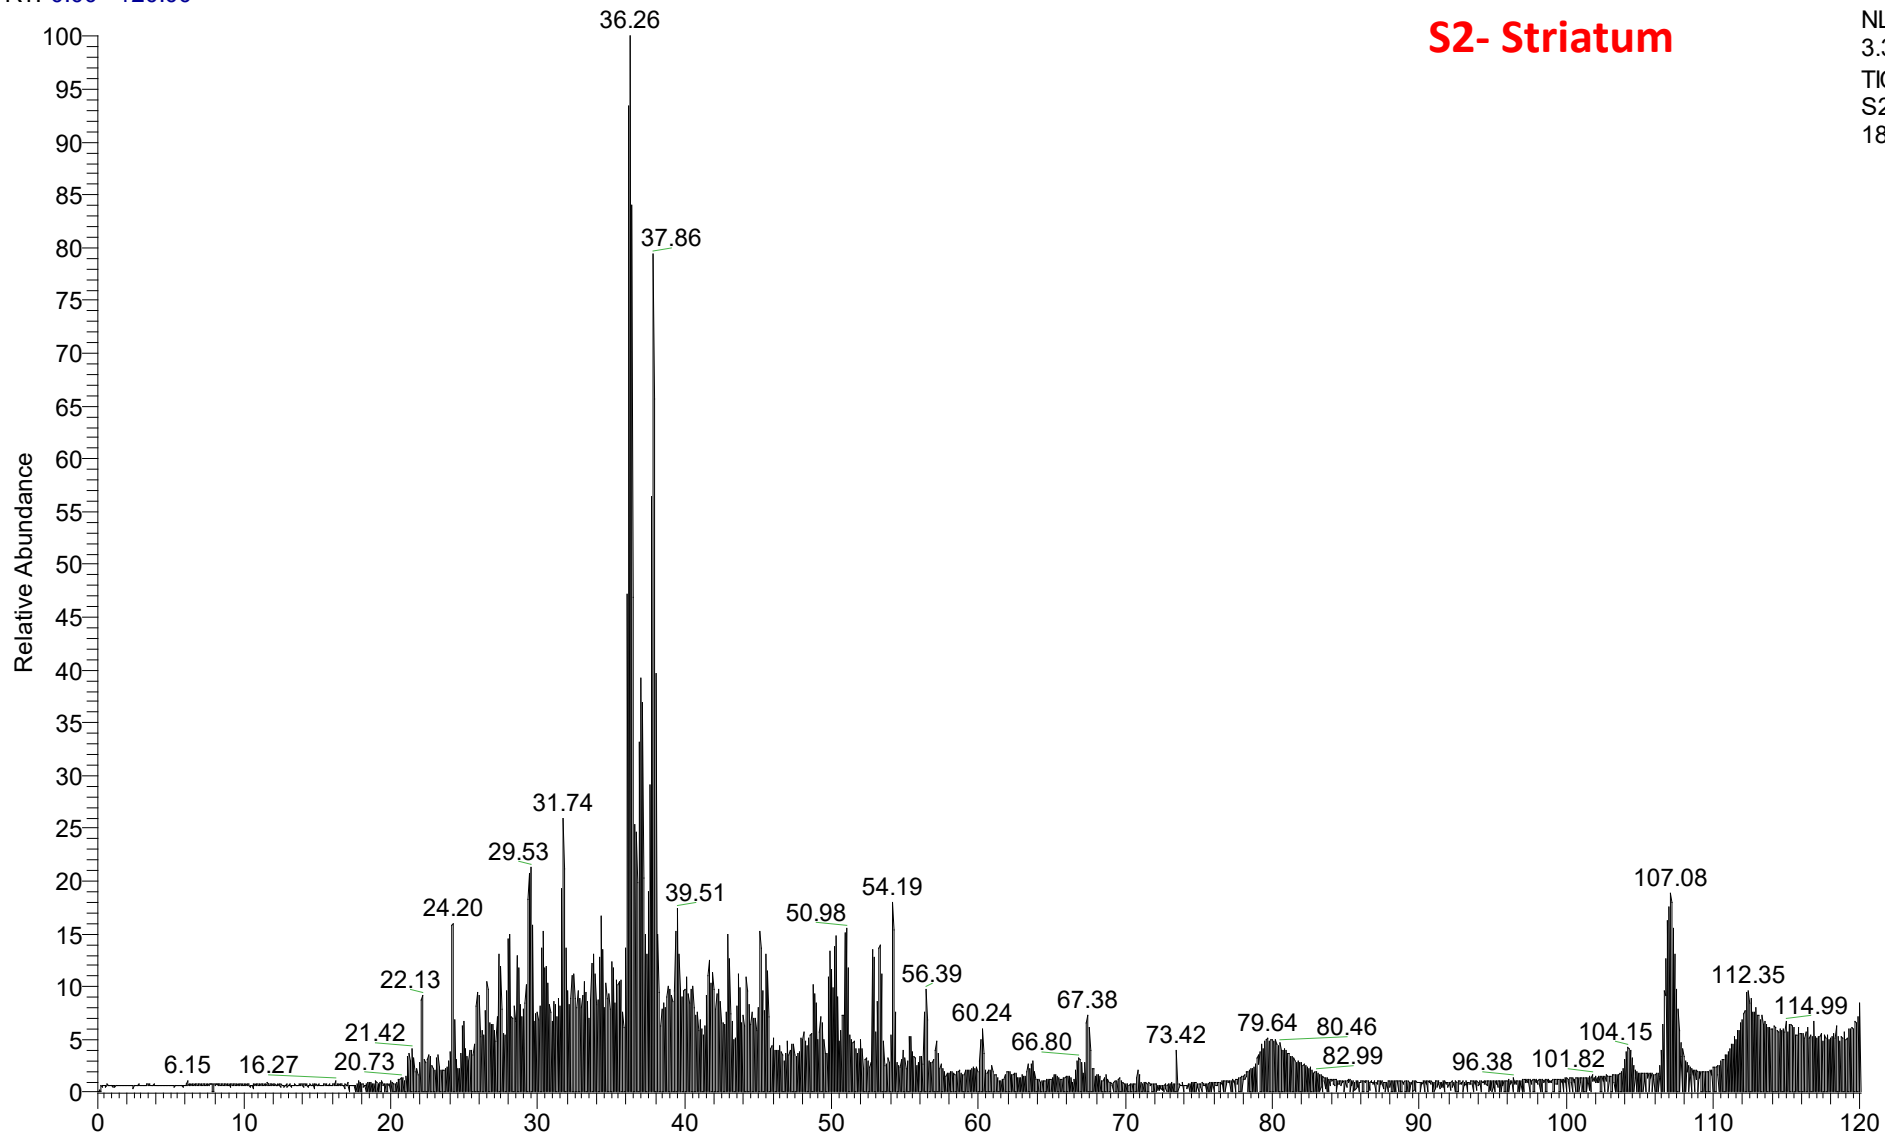

RT: 0.00 - 120.00

### S3- Striatum

NL:  
3.69E9  
TIC MS  
S3\_06152C  
18\_01

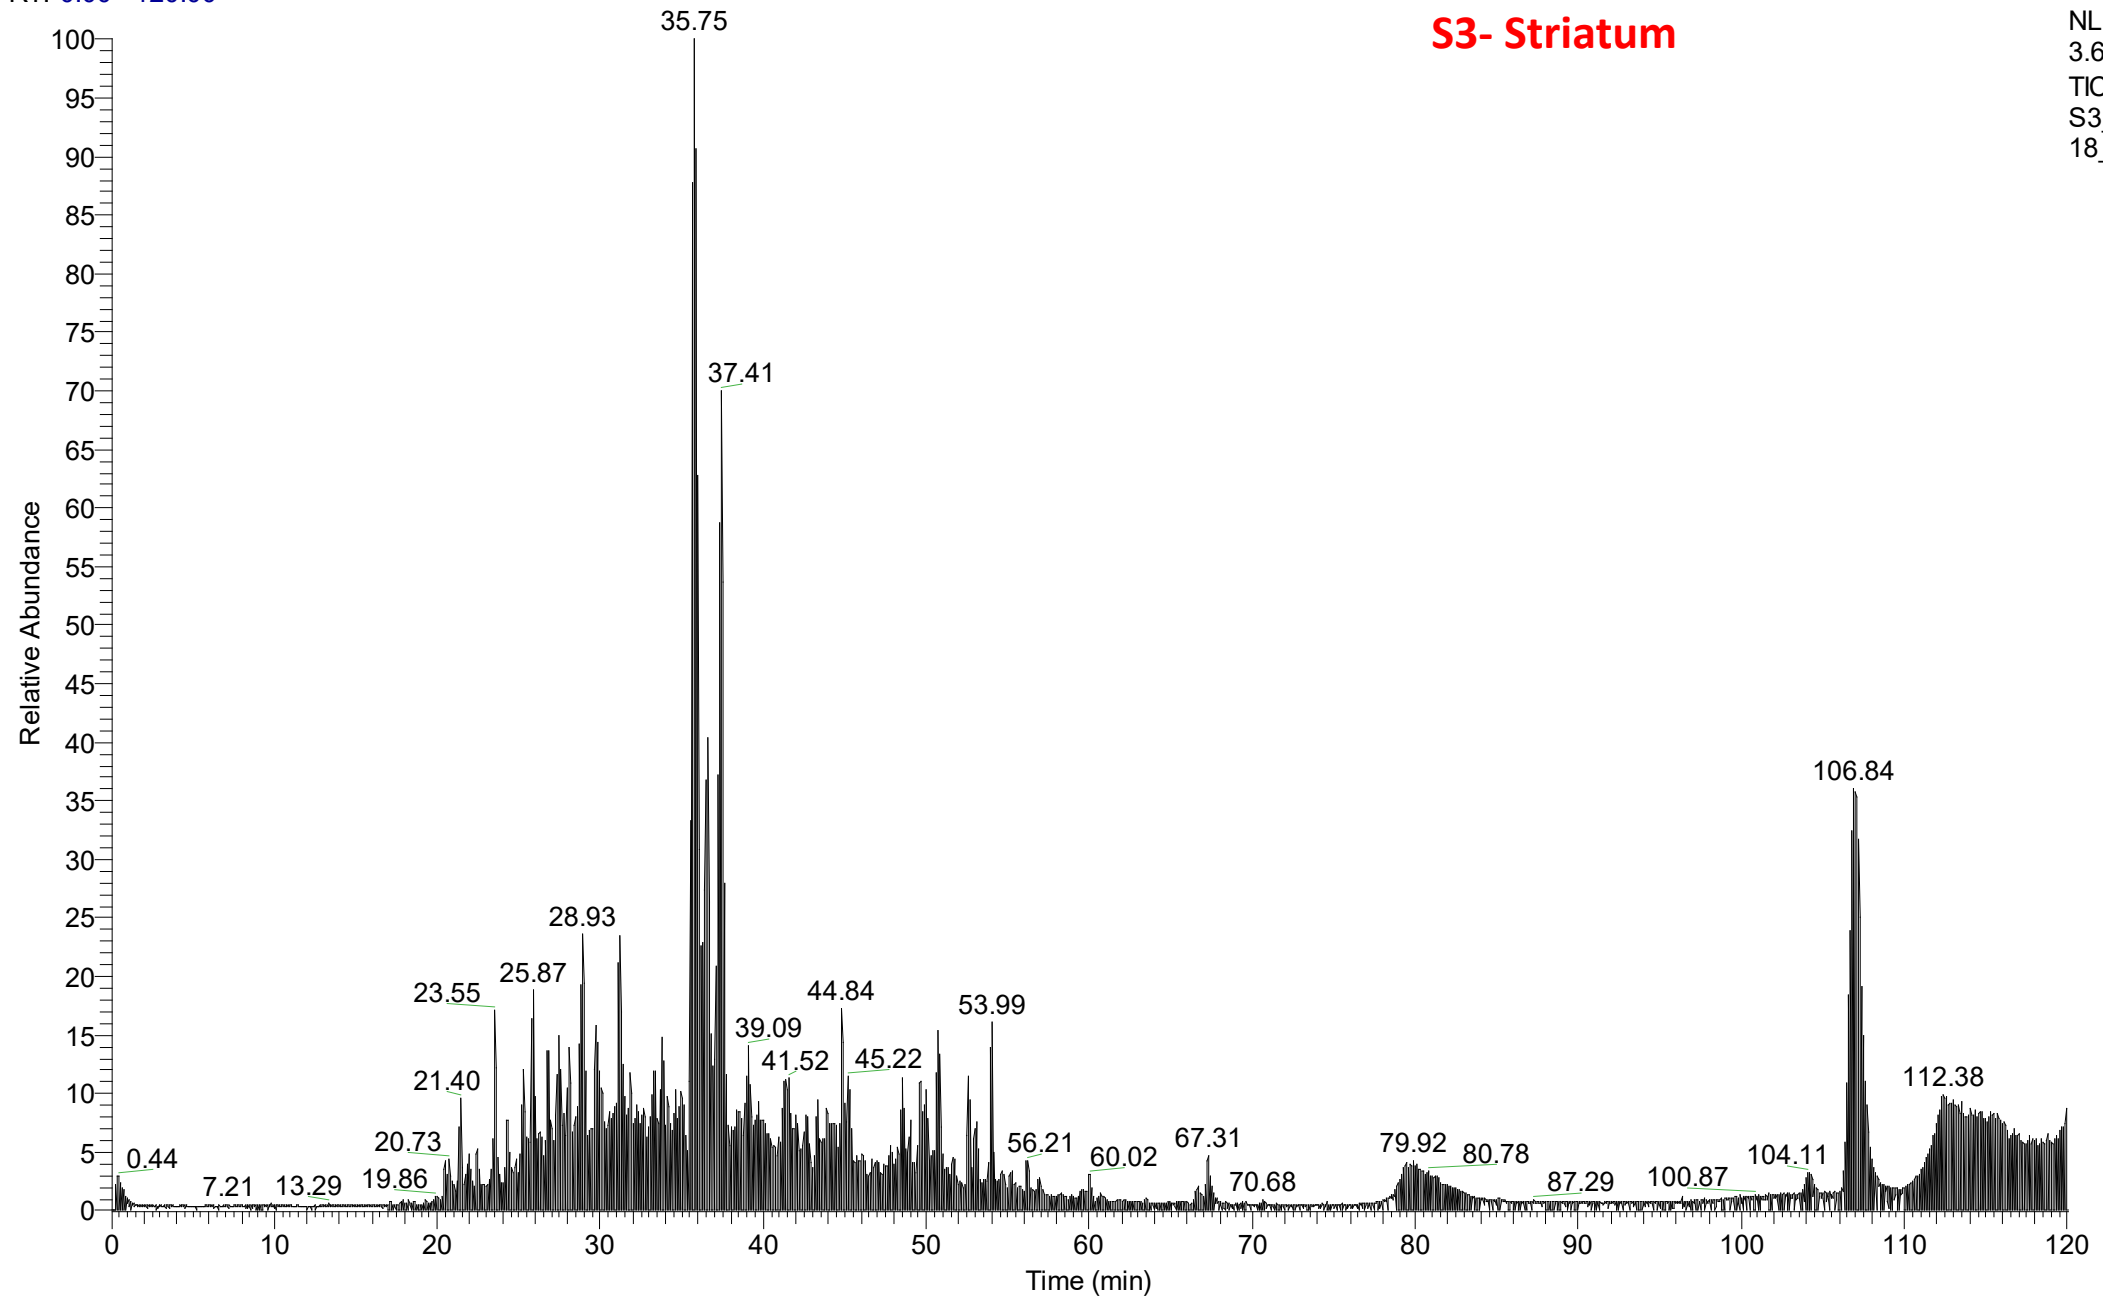



RT: 0.00 - 120.00

# S4- Striatum

NL:  
3.96E9  
TIC MS  
S4\_061520  
18\_01

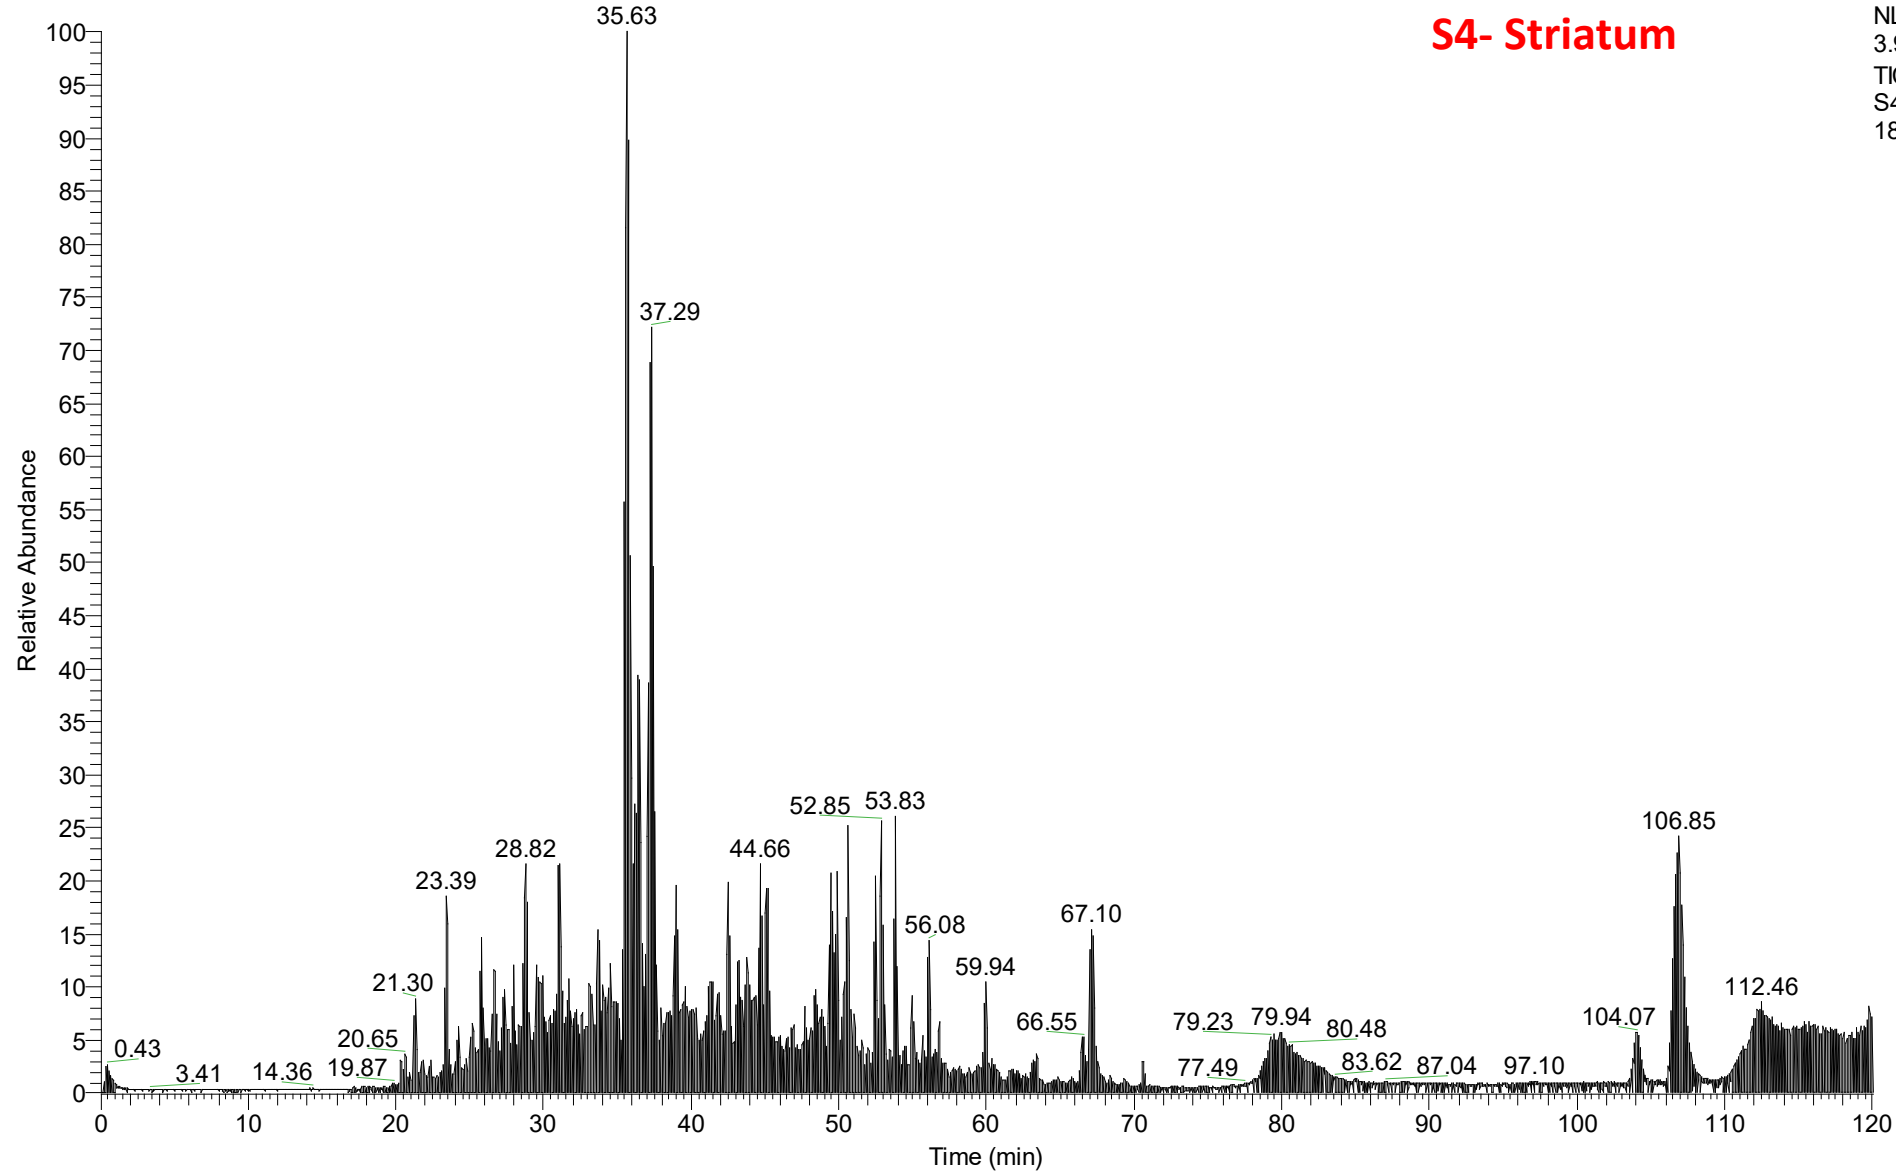

RT: 0.00 - 120.01

# S5- Striatum

NL:  
3.23E9  
TIC MS  
S5\_061520  
18\_01

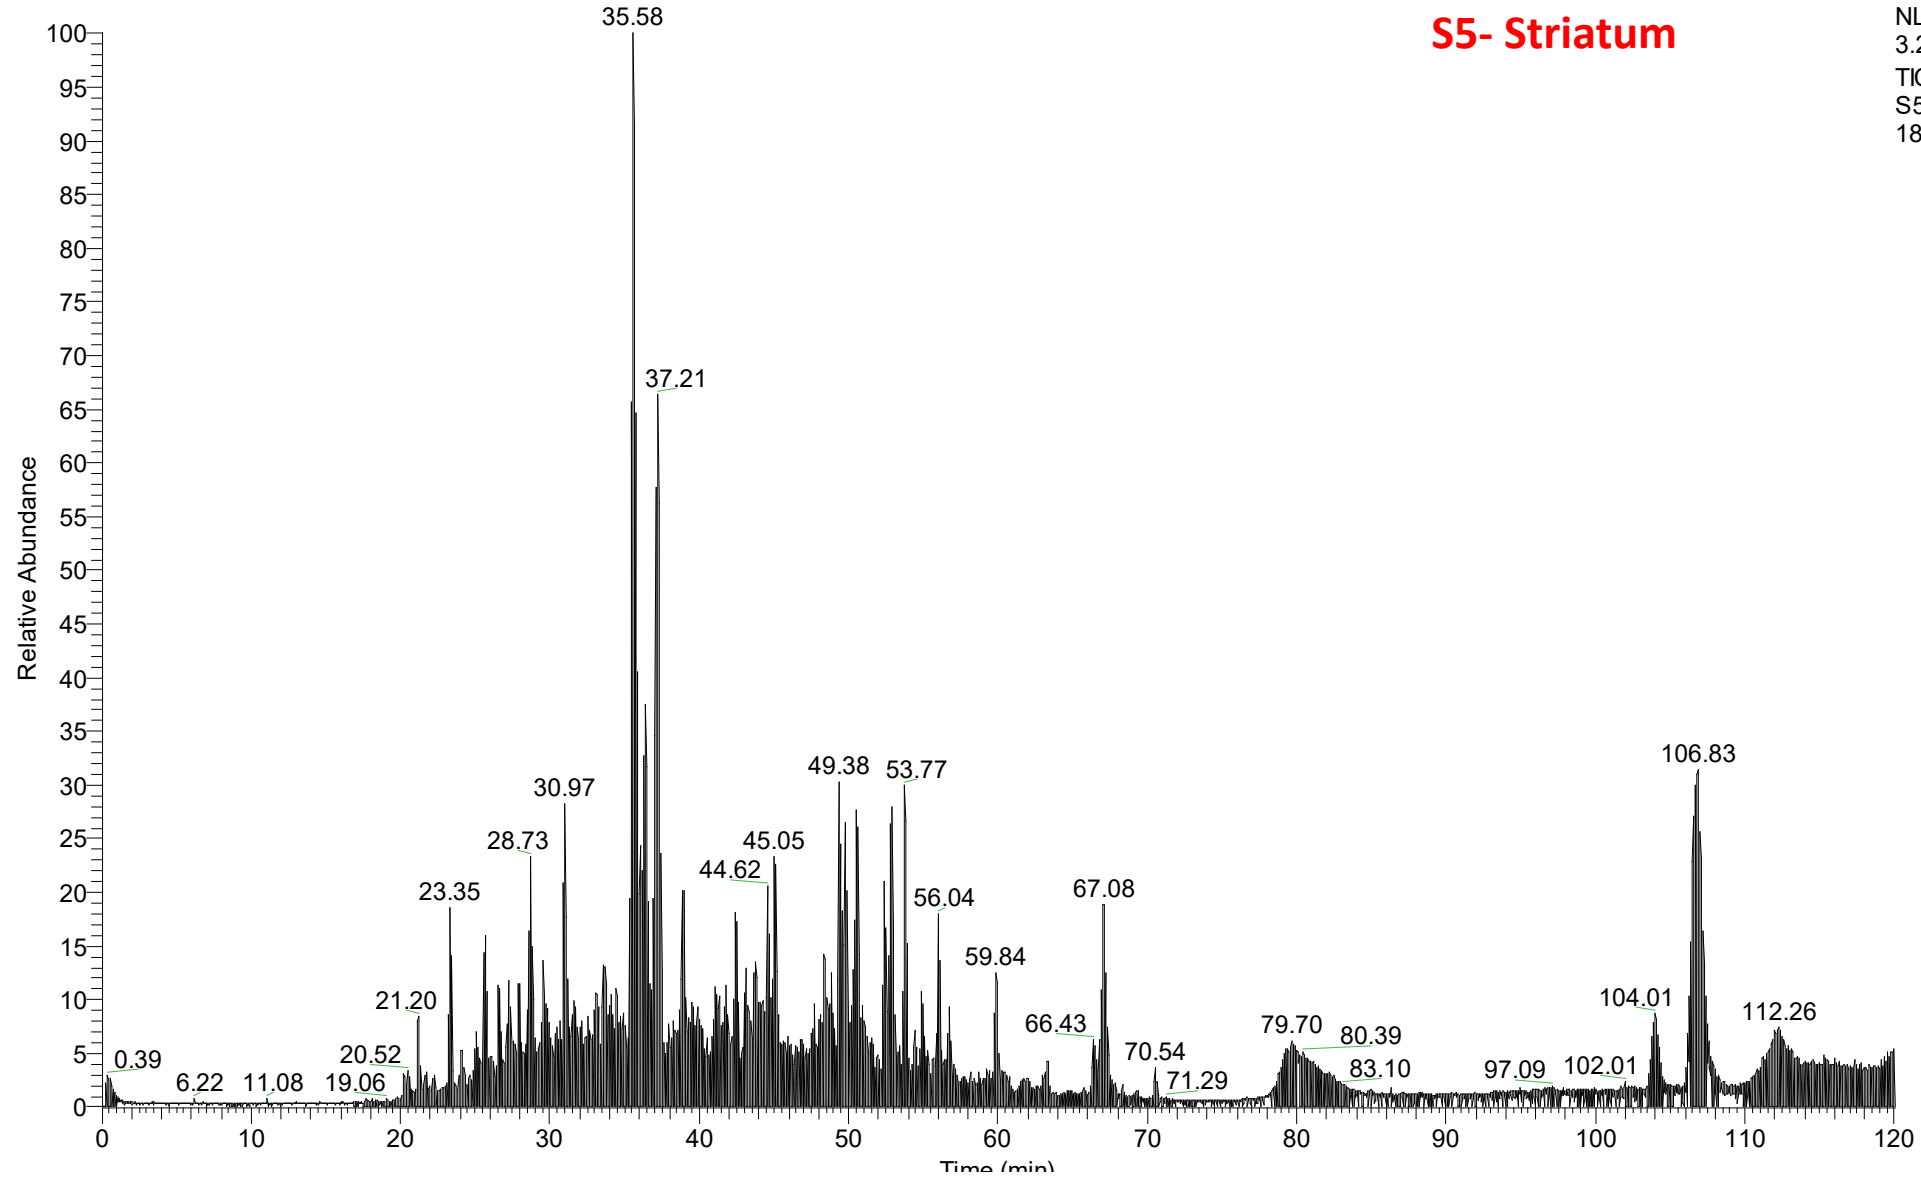

RT: 0.00 - 120.01

# S6- Striatum

NL:  
2.70E9  
TIC MS  
S6\_061520  
18\_01

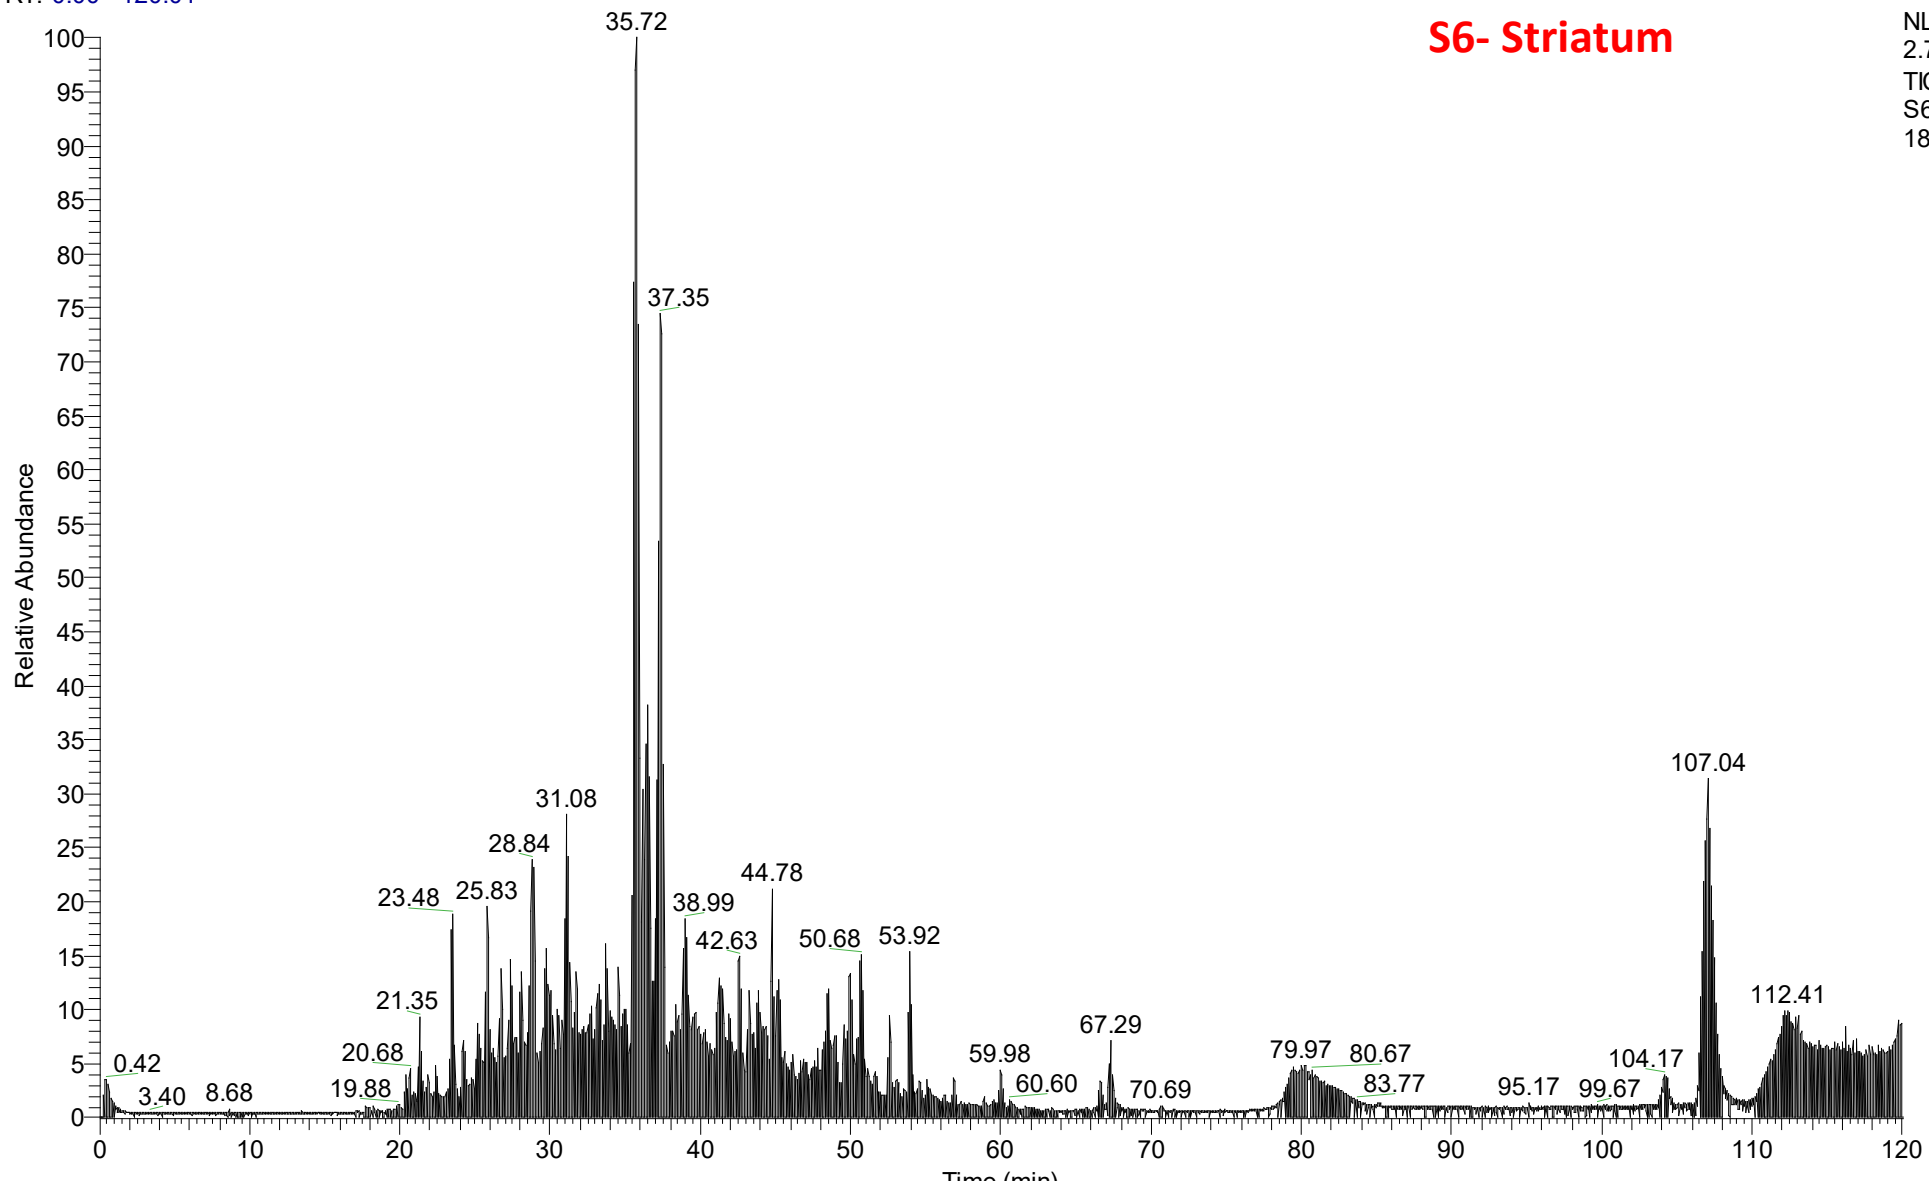

RT: 0.00 - 120.00

# C1- Lateral hypothalamus

NL:  
2.16E9  
TIC MS  
C1\_073120  
17\_01

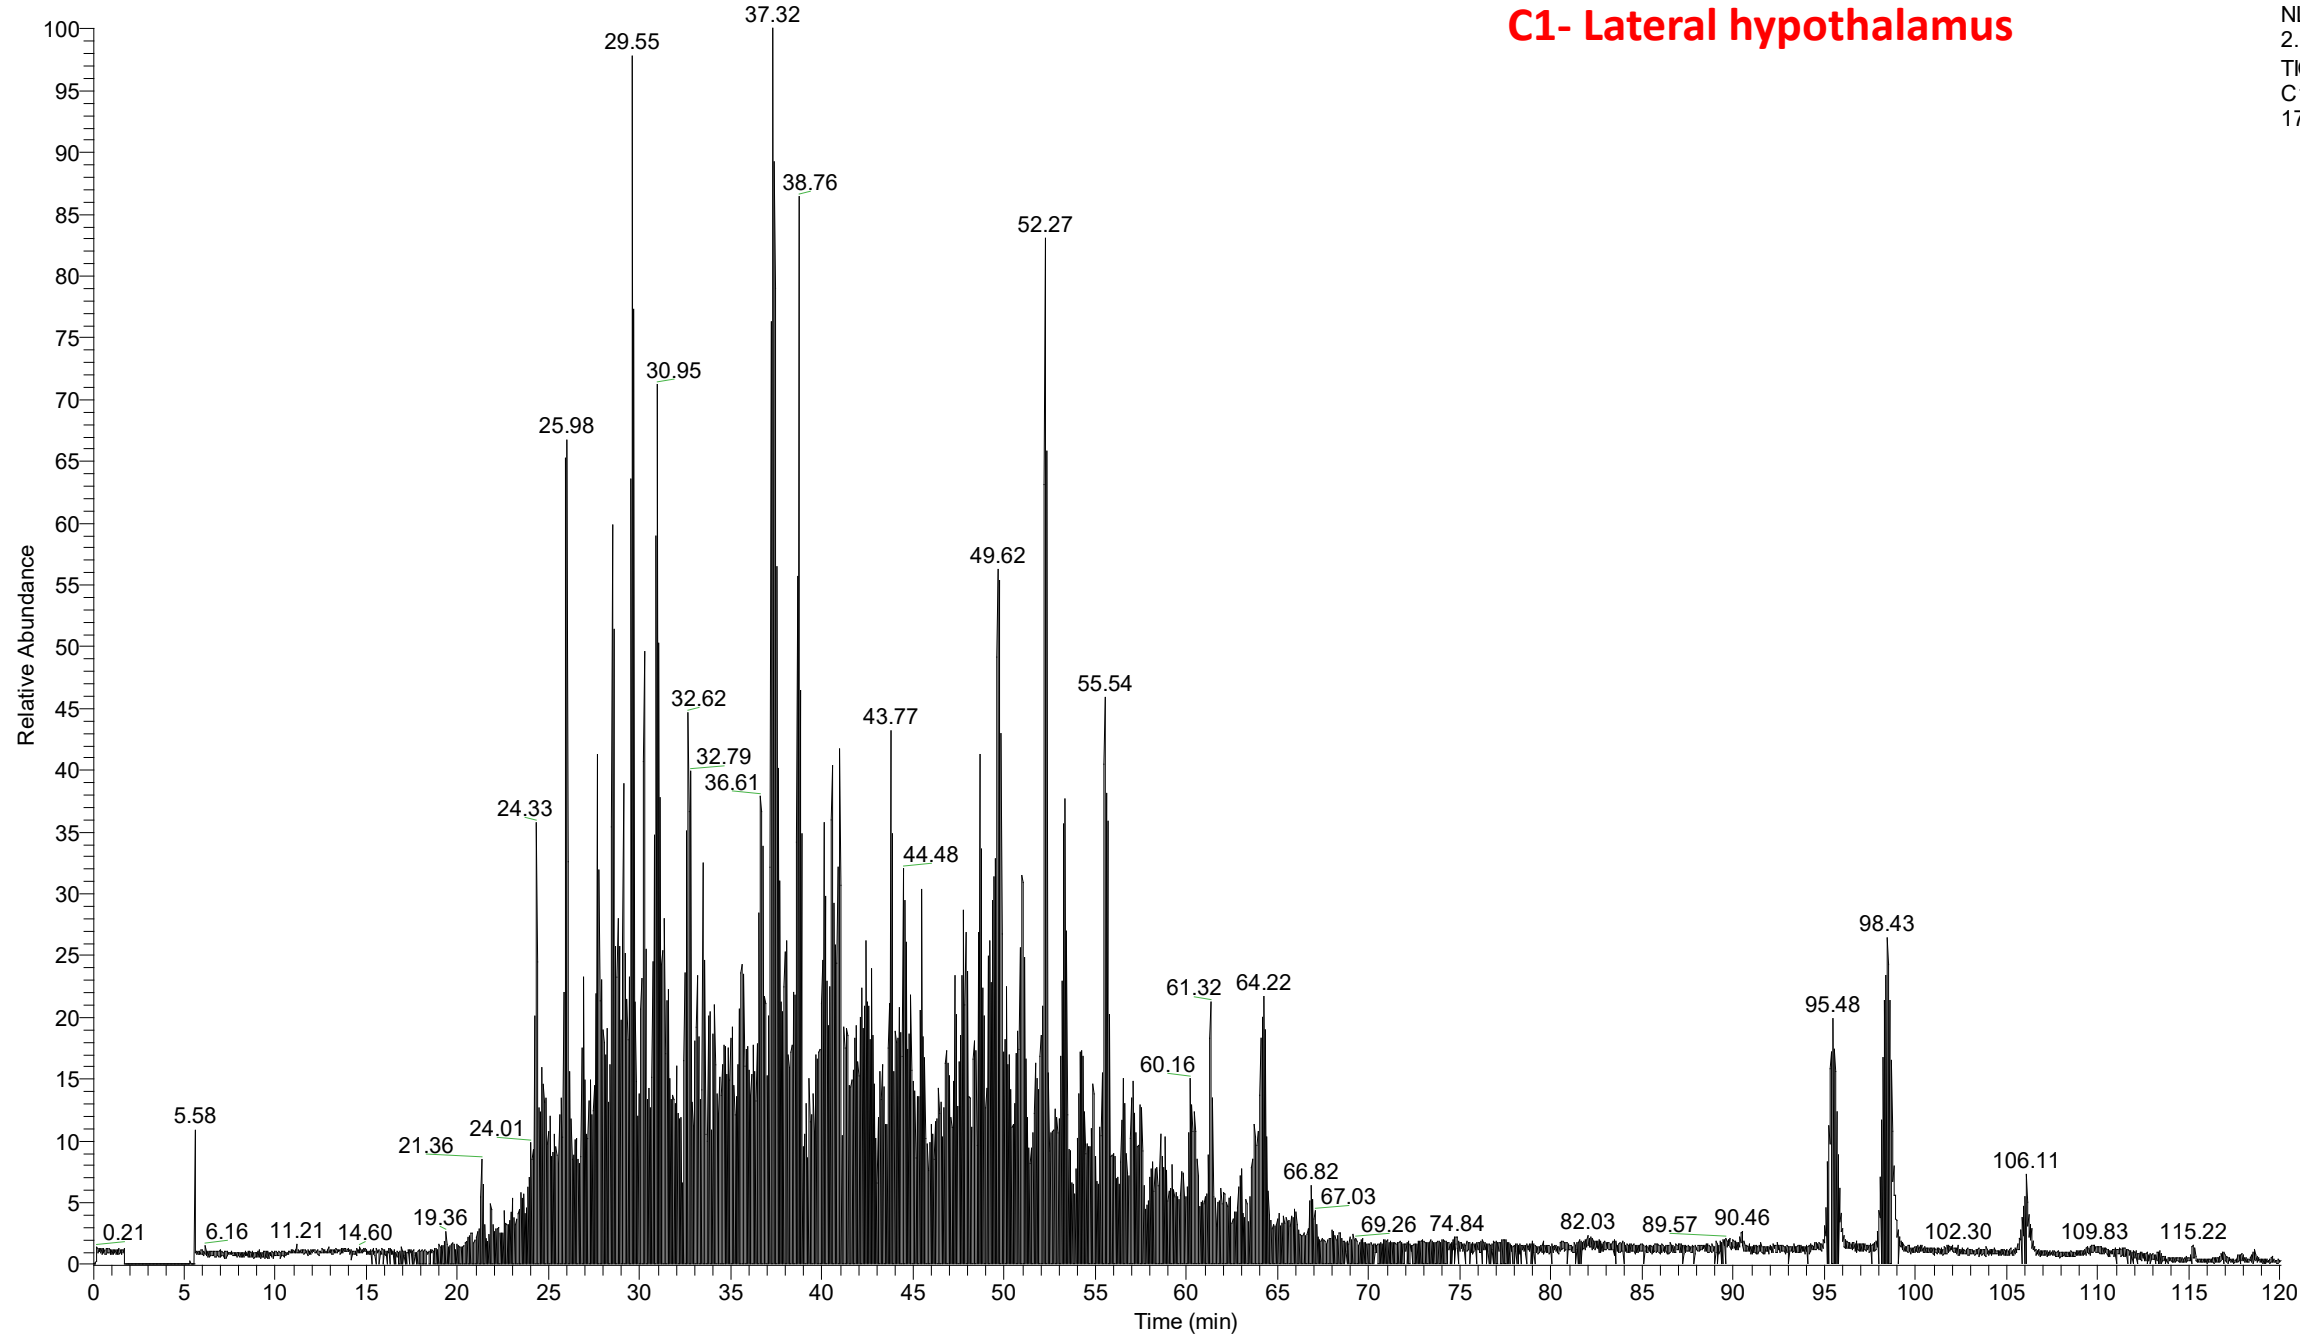

RT: 0.00 - 120.00

# C2- Lateral hypothalamus

NL:  
2.48E9  
TIC MS  
C2\_073120  
17\_01r

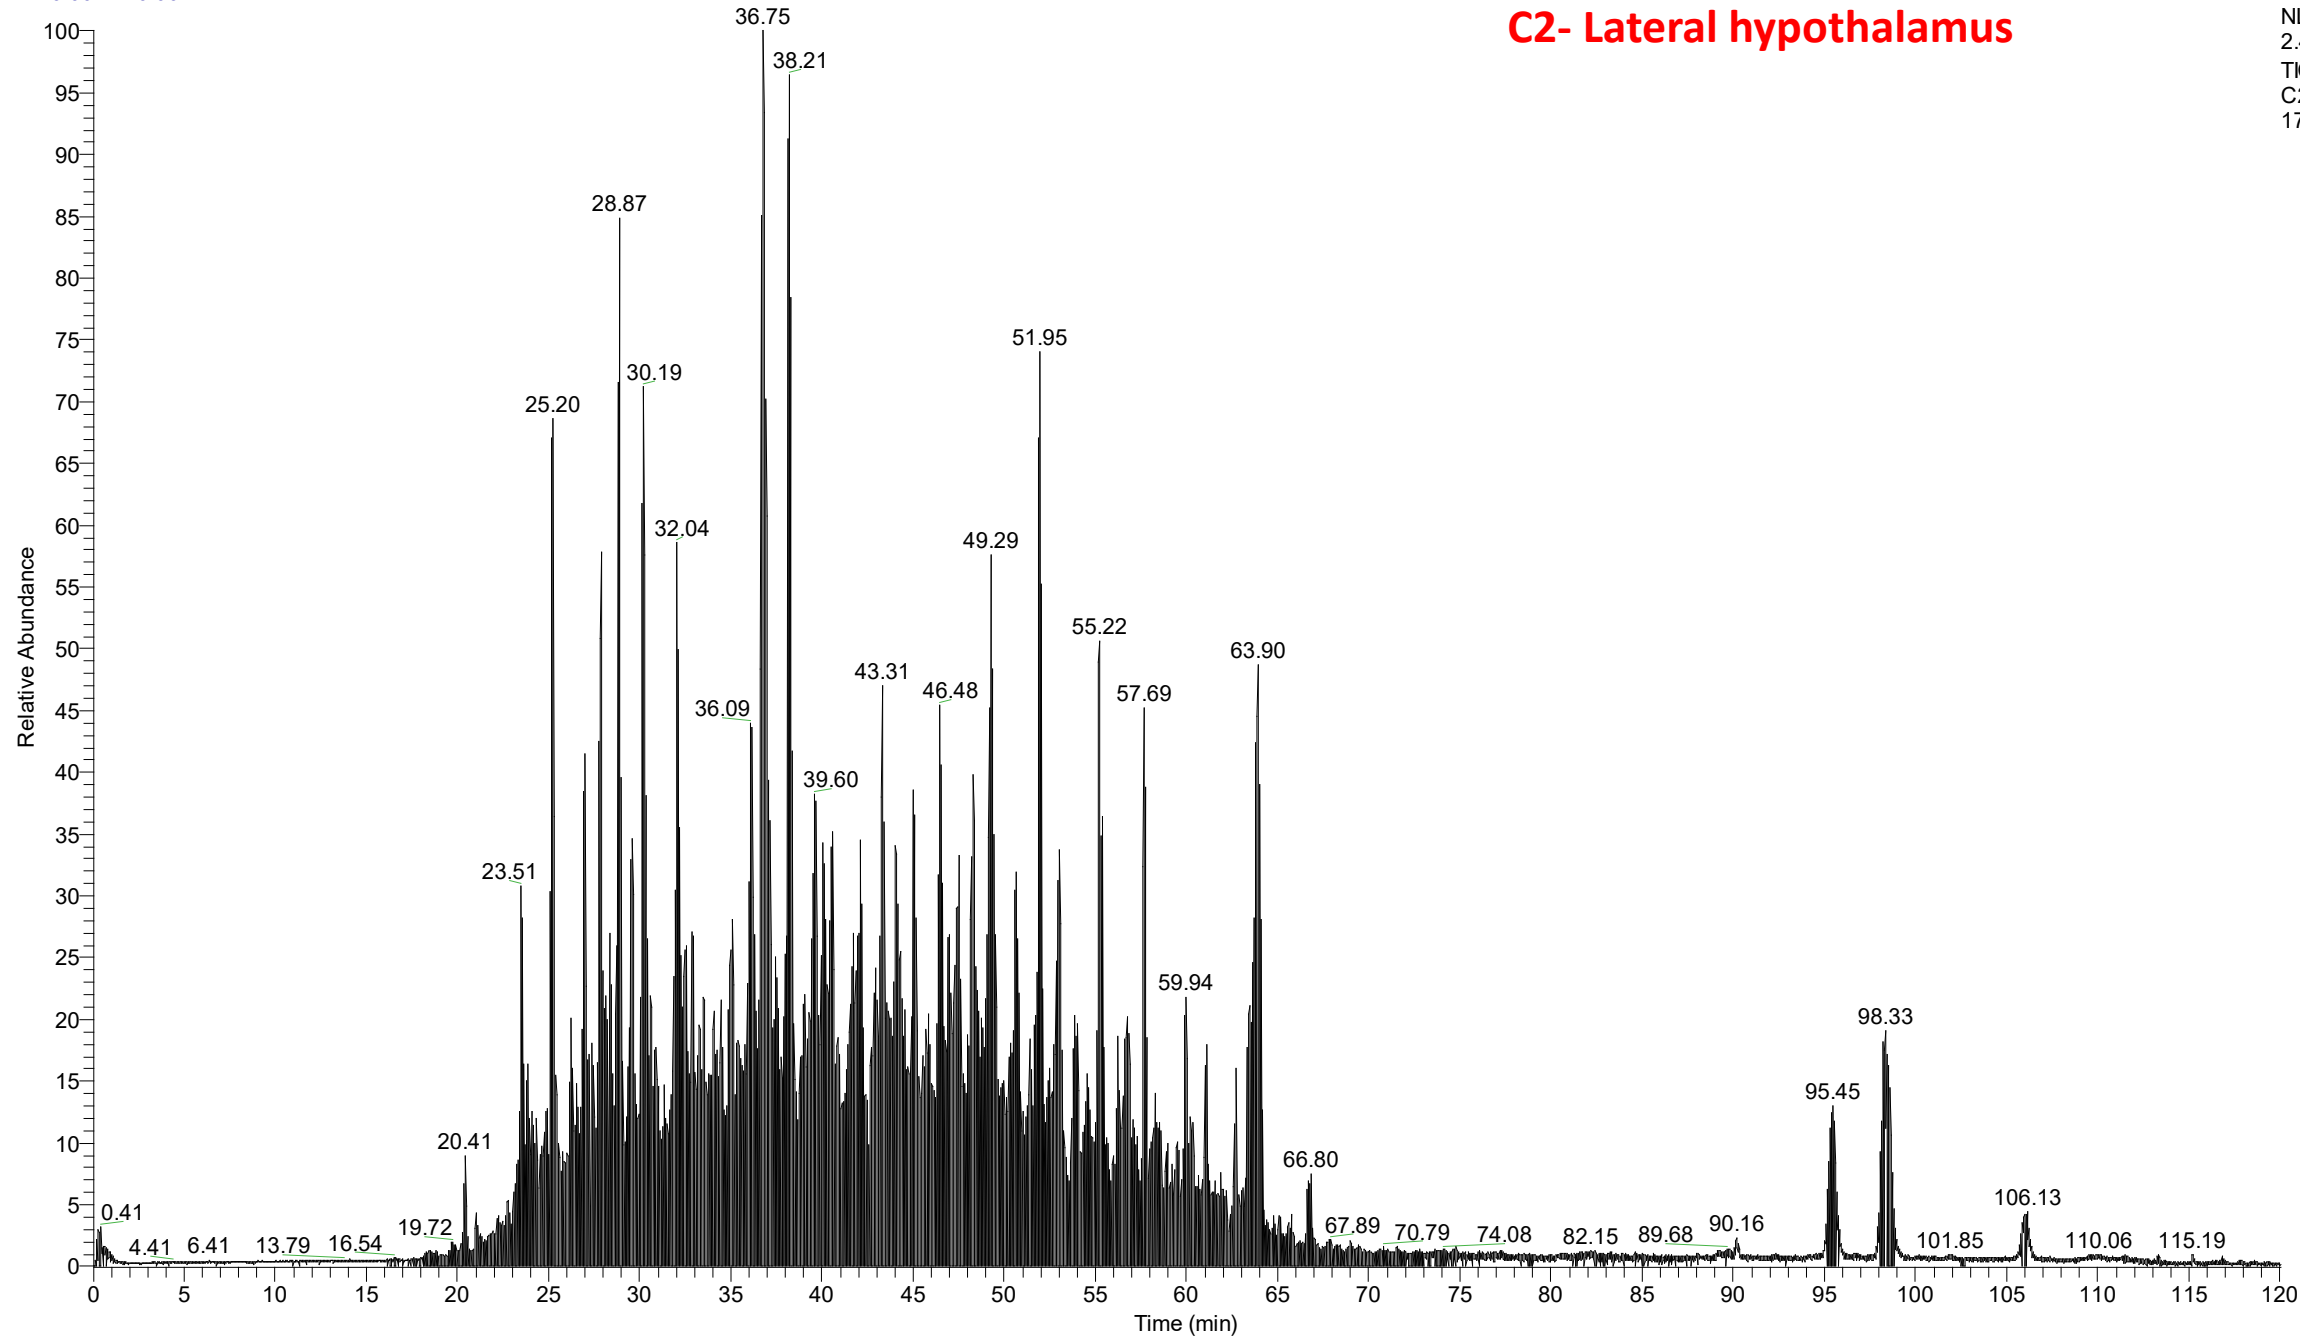

RT: 0.00 - 120.00

# C3- Lateral hypothalamus

NL:  
2.47E9  
TIC MS  
C3\_073120  
17\_01

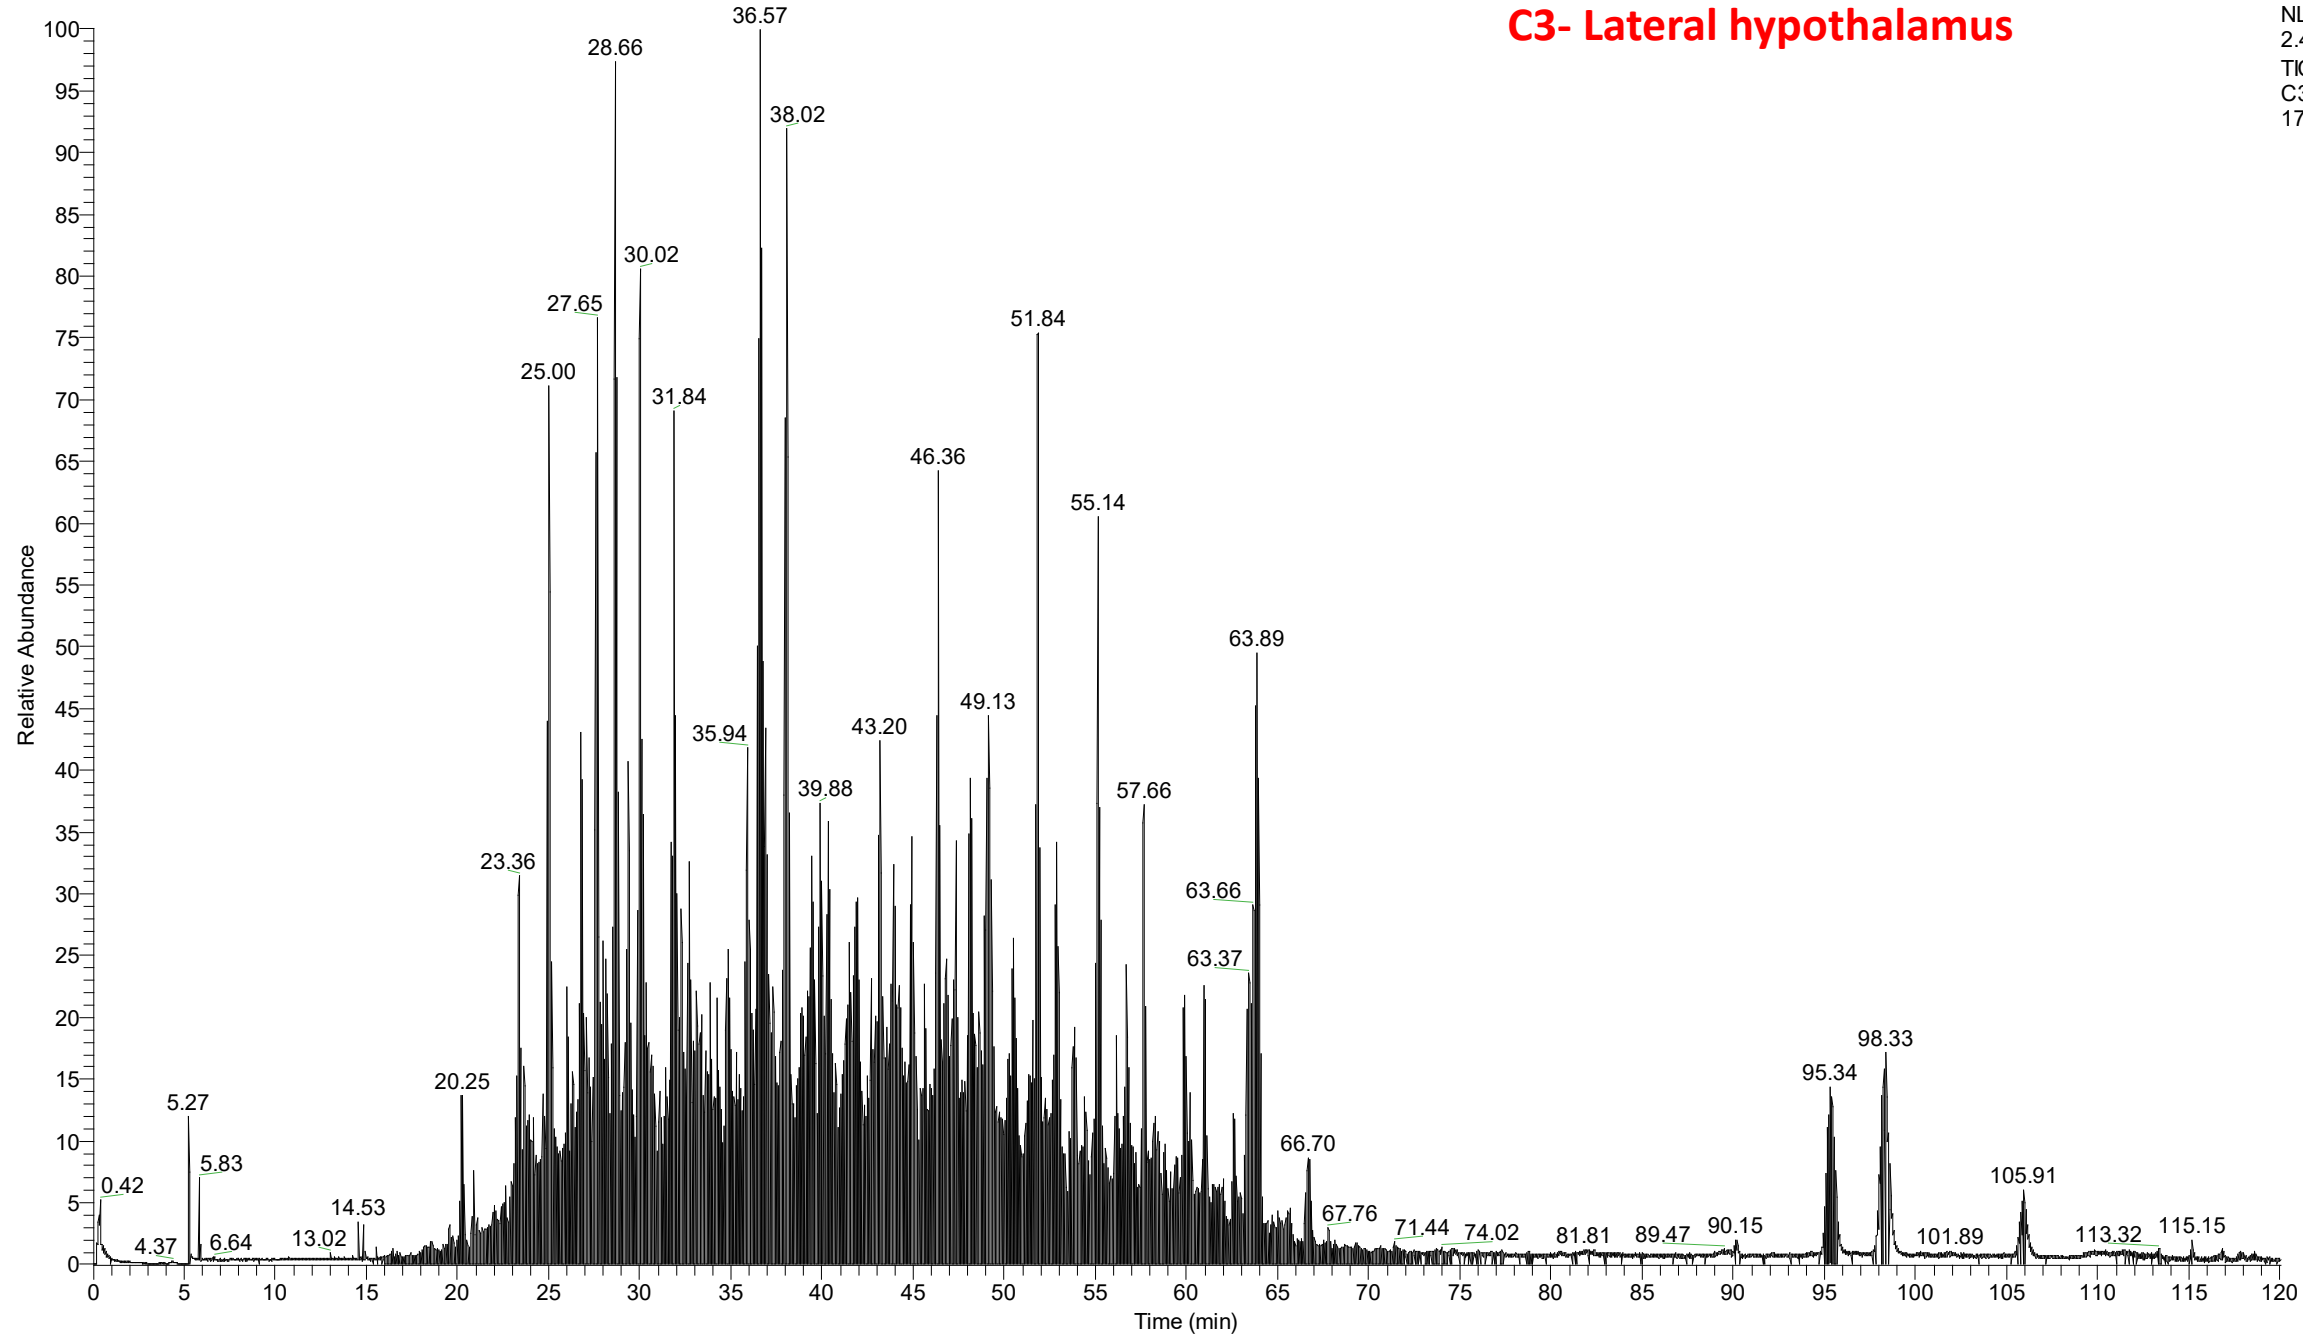

RT: 0.00 - 120.00

# C4- Lateral hypothalamus

NL:  
3.01E9  
TIC MS  
C4\_073120  
17\_01

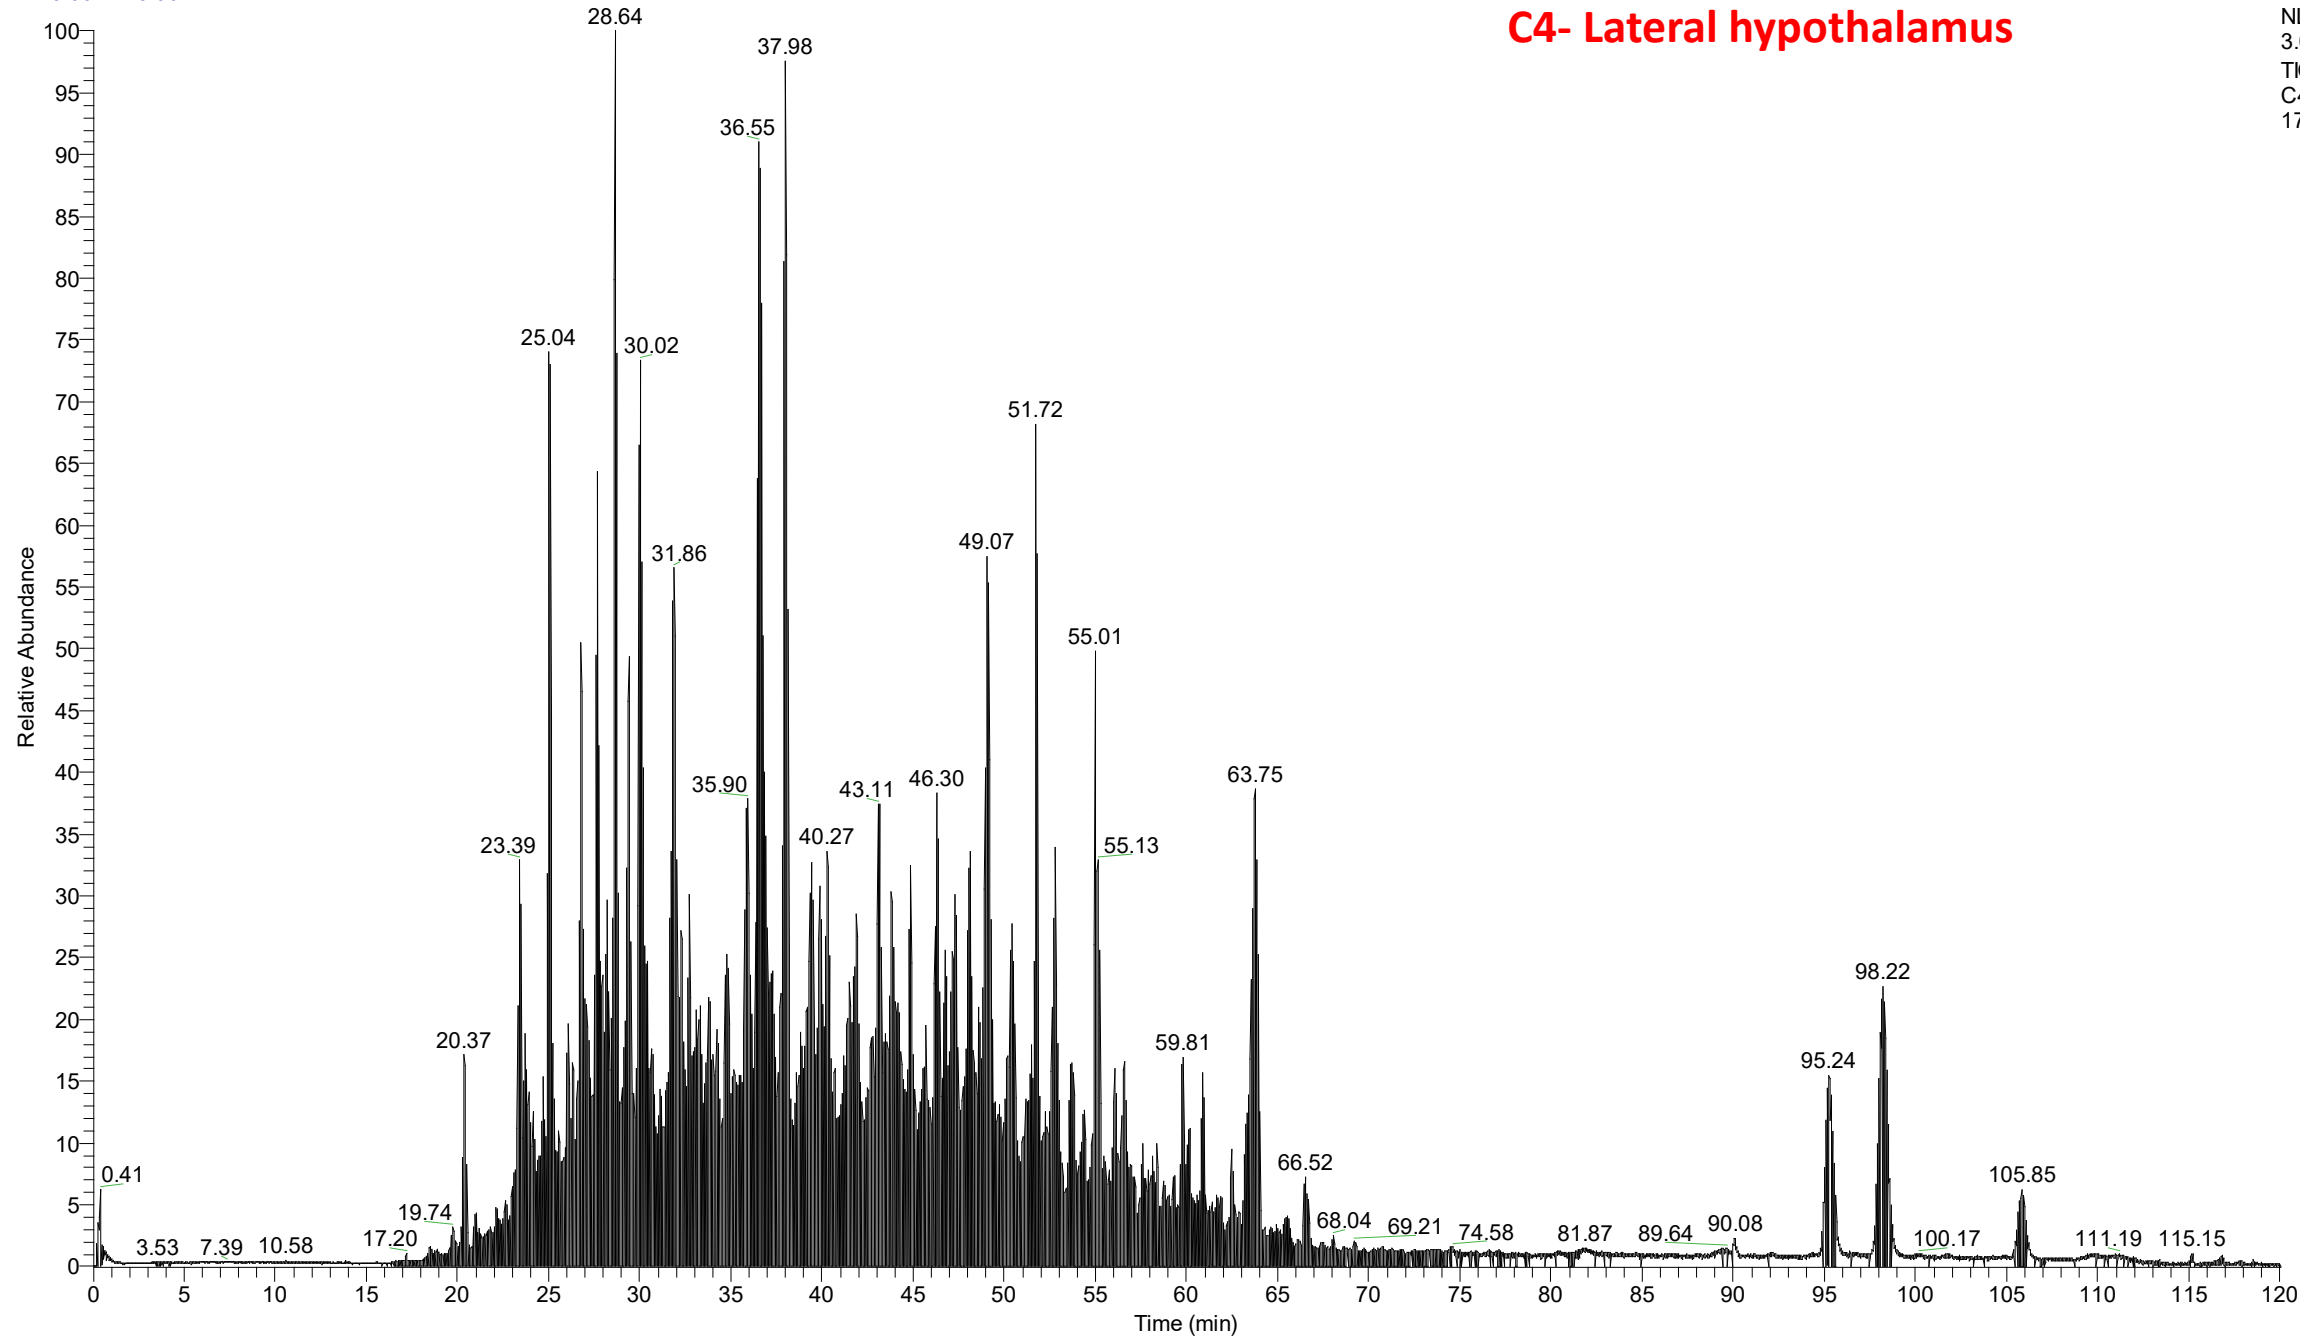

RT: 0.00 - 120.00

# C5- Lateral hypothalamus

NL:  
2.82E9  
TIC MS  
C5\_073120  
17\_01r

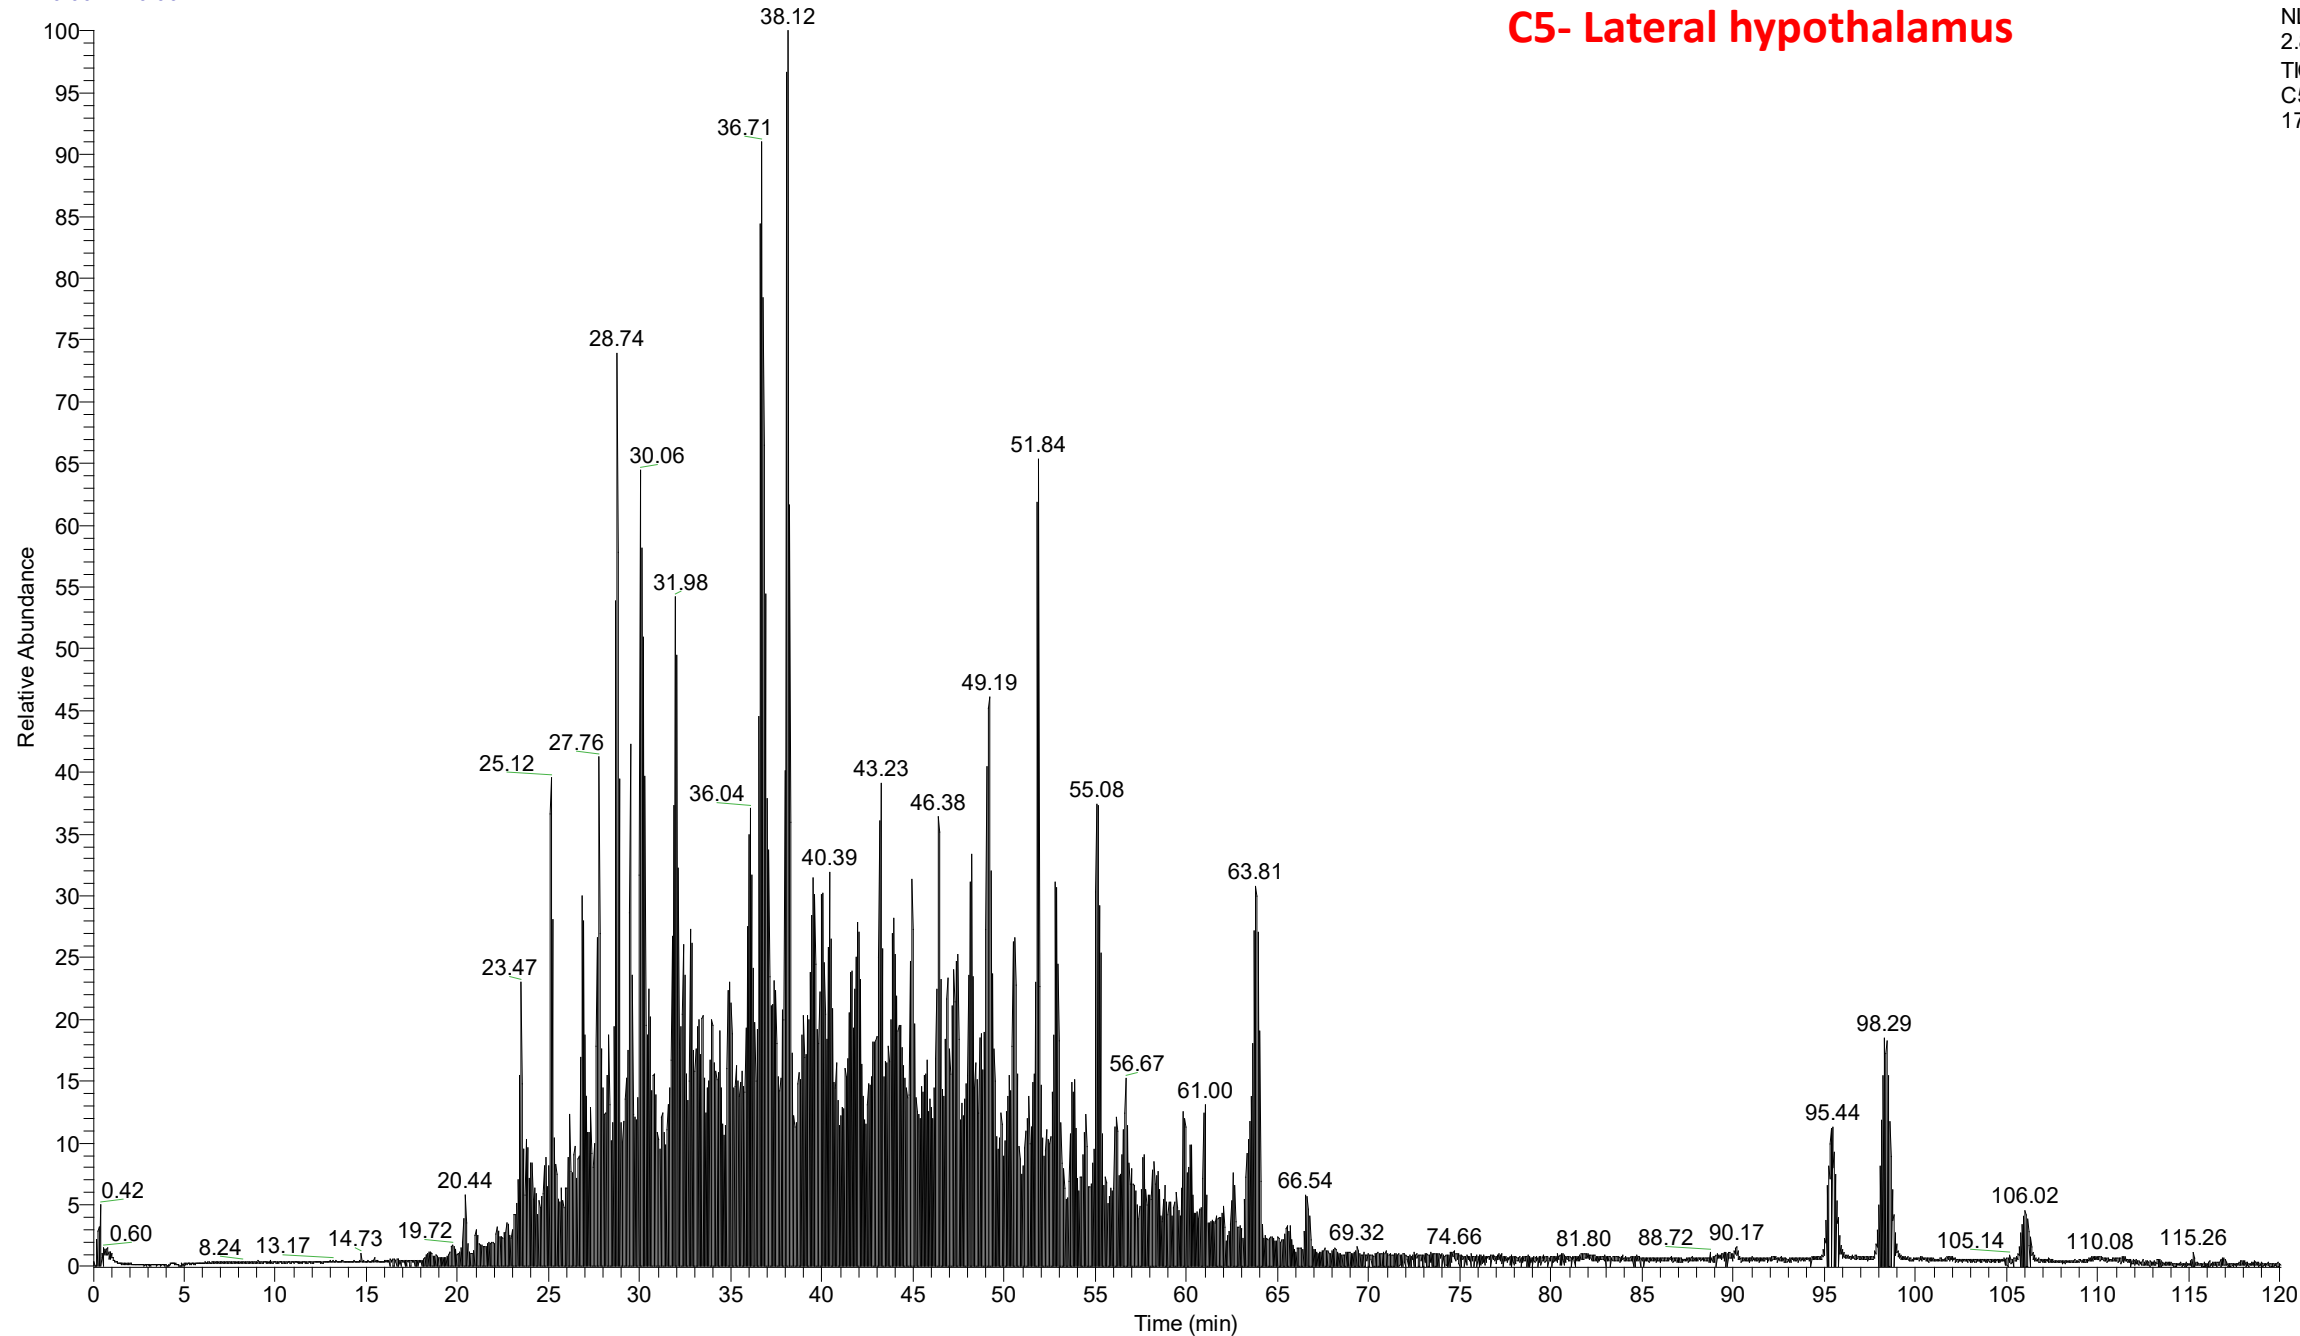



RT: 0.00 - 120.00

# C6- Lateral hypothalamus

NL:  
3.00E9  
TIC MS  
C6\_073120  
17\_01

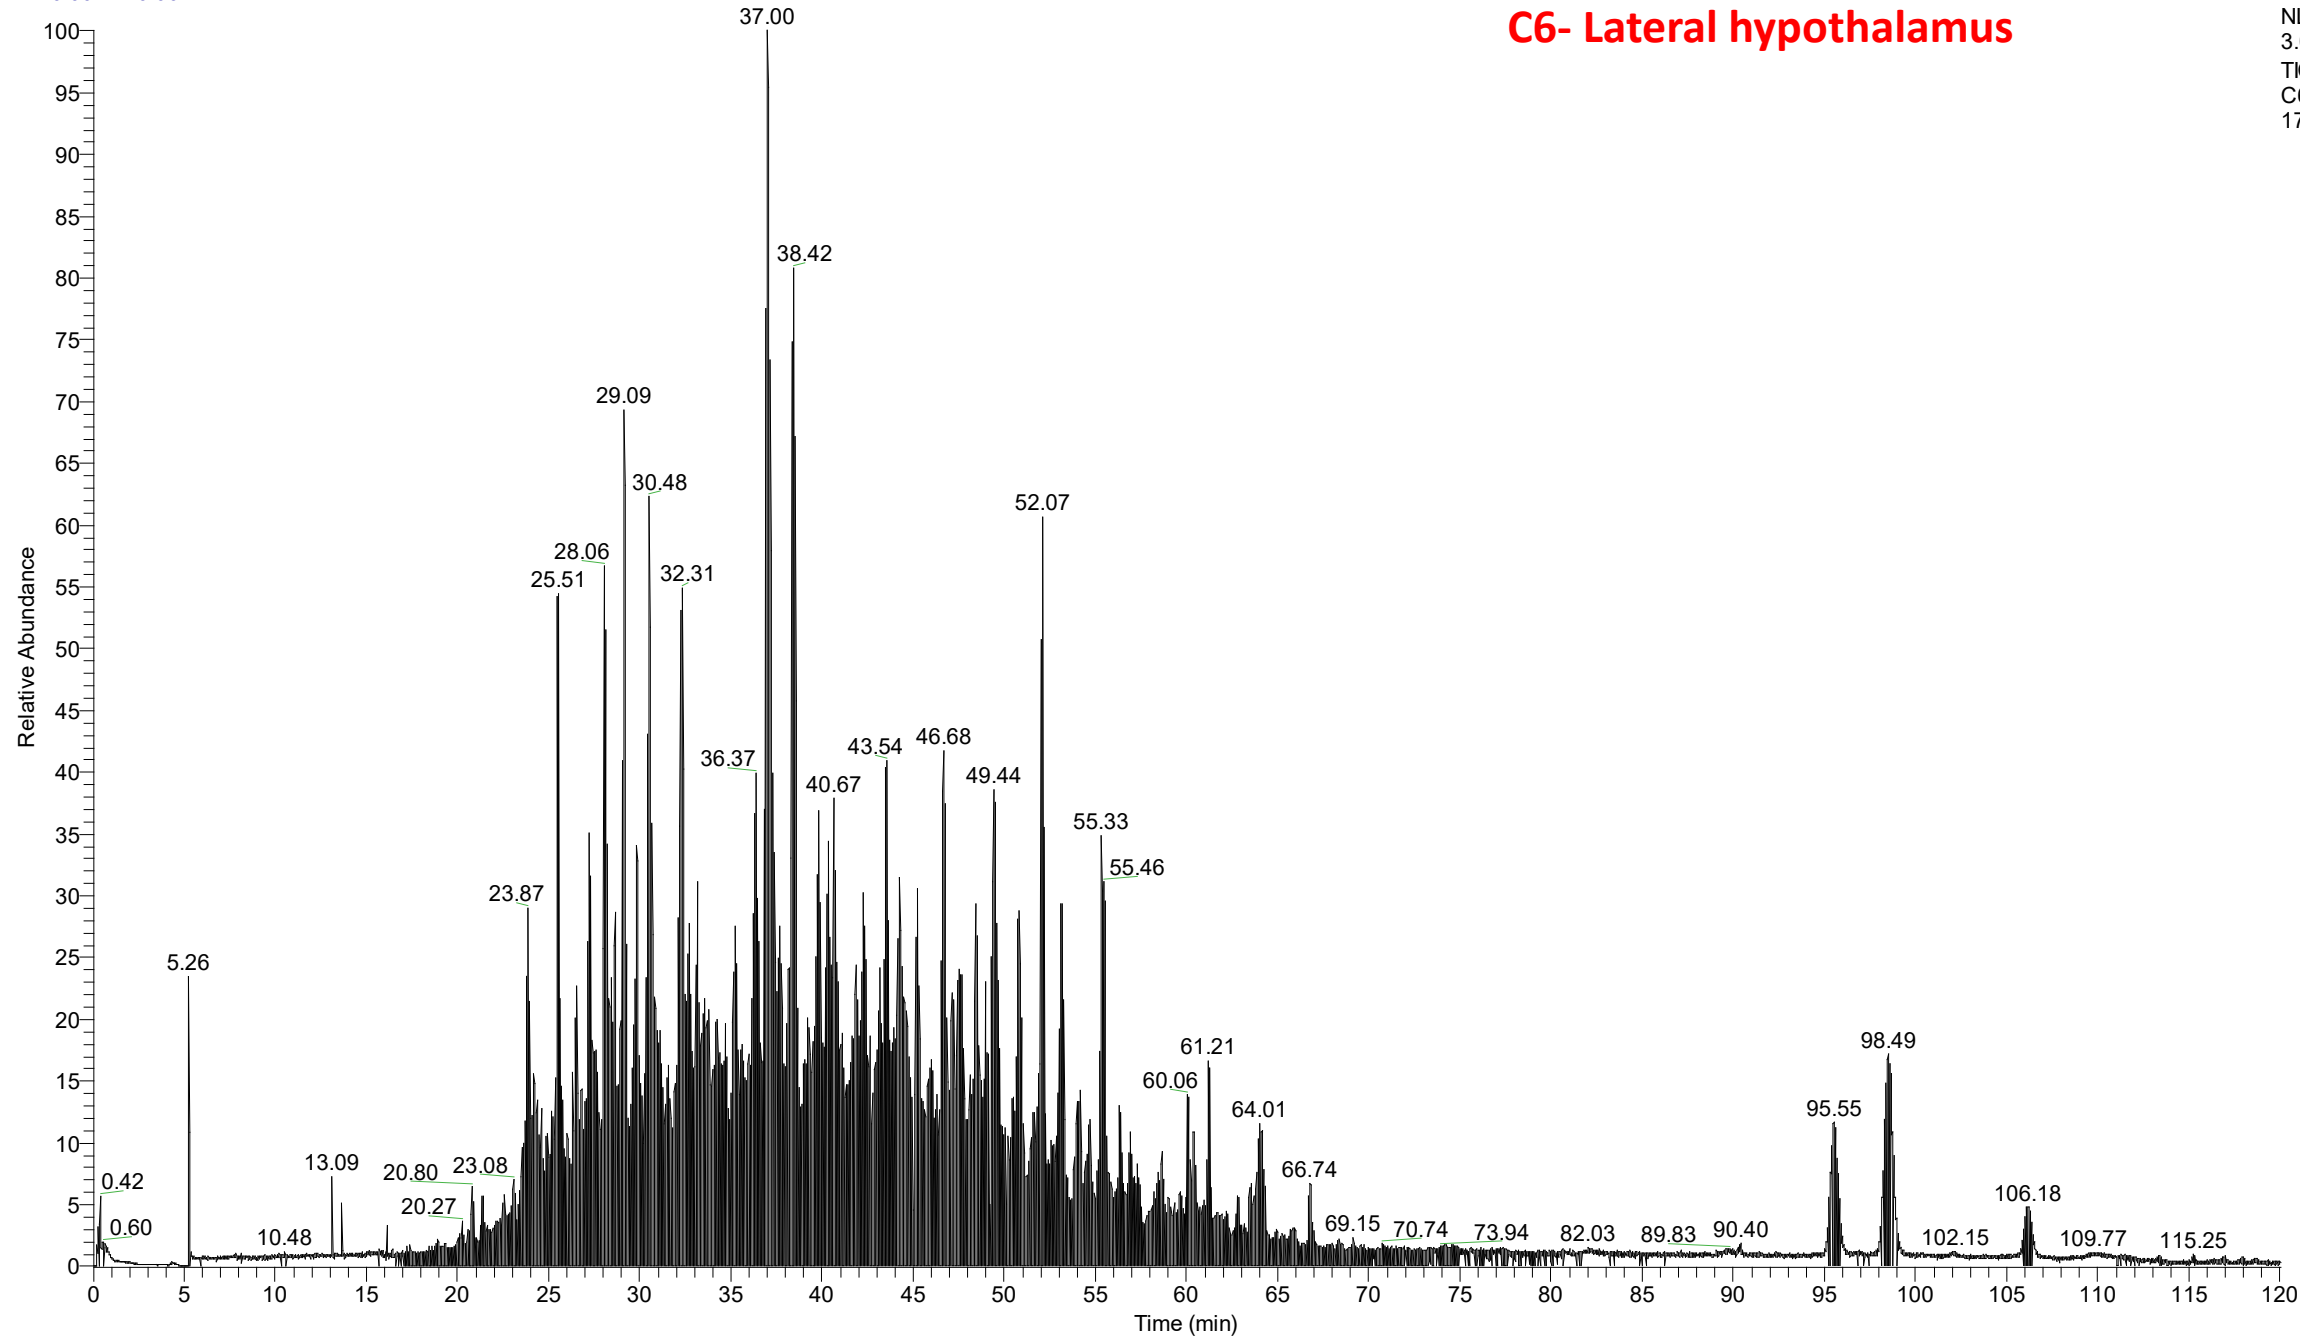

RT: 0.00 - 120.00

# M1- Lateral hypothalamus

NL:  
1.90E9  
TIC MS  
M1\_08012  
017\_01

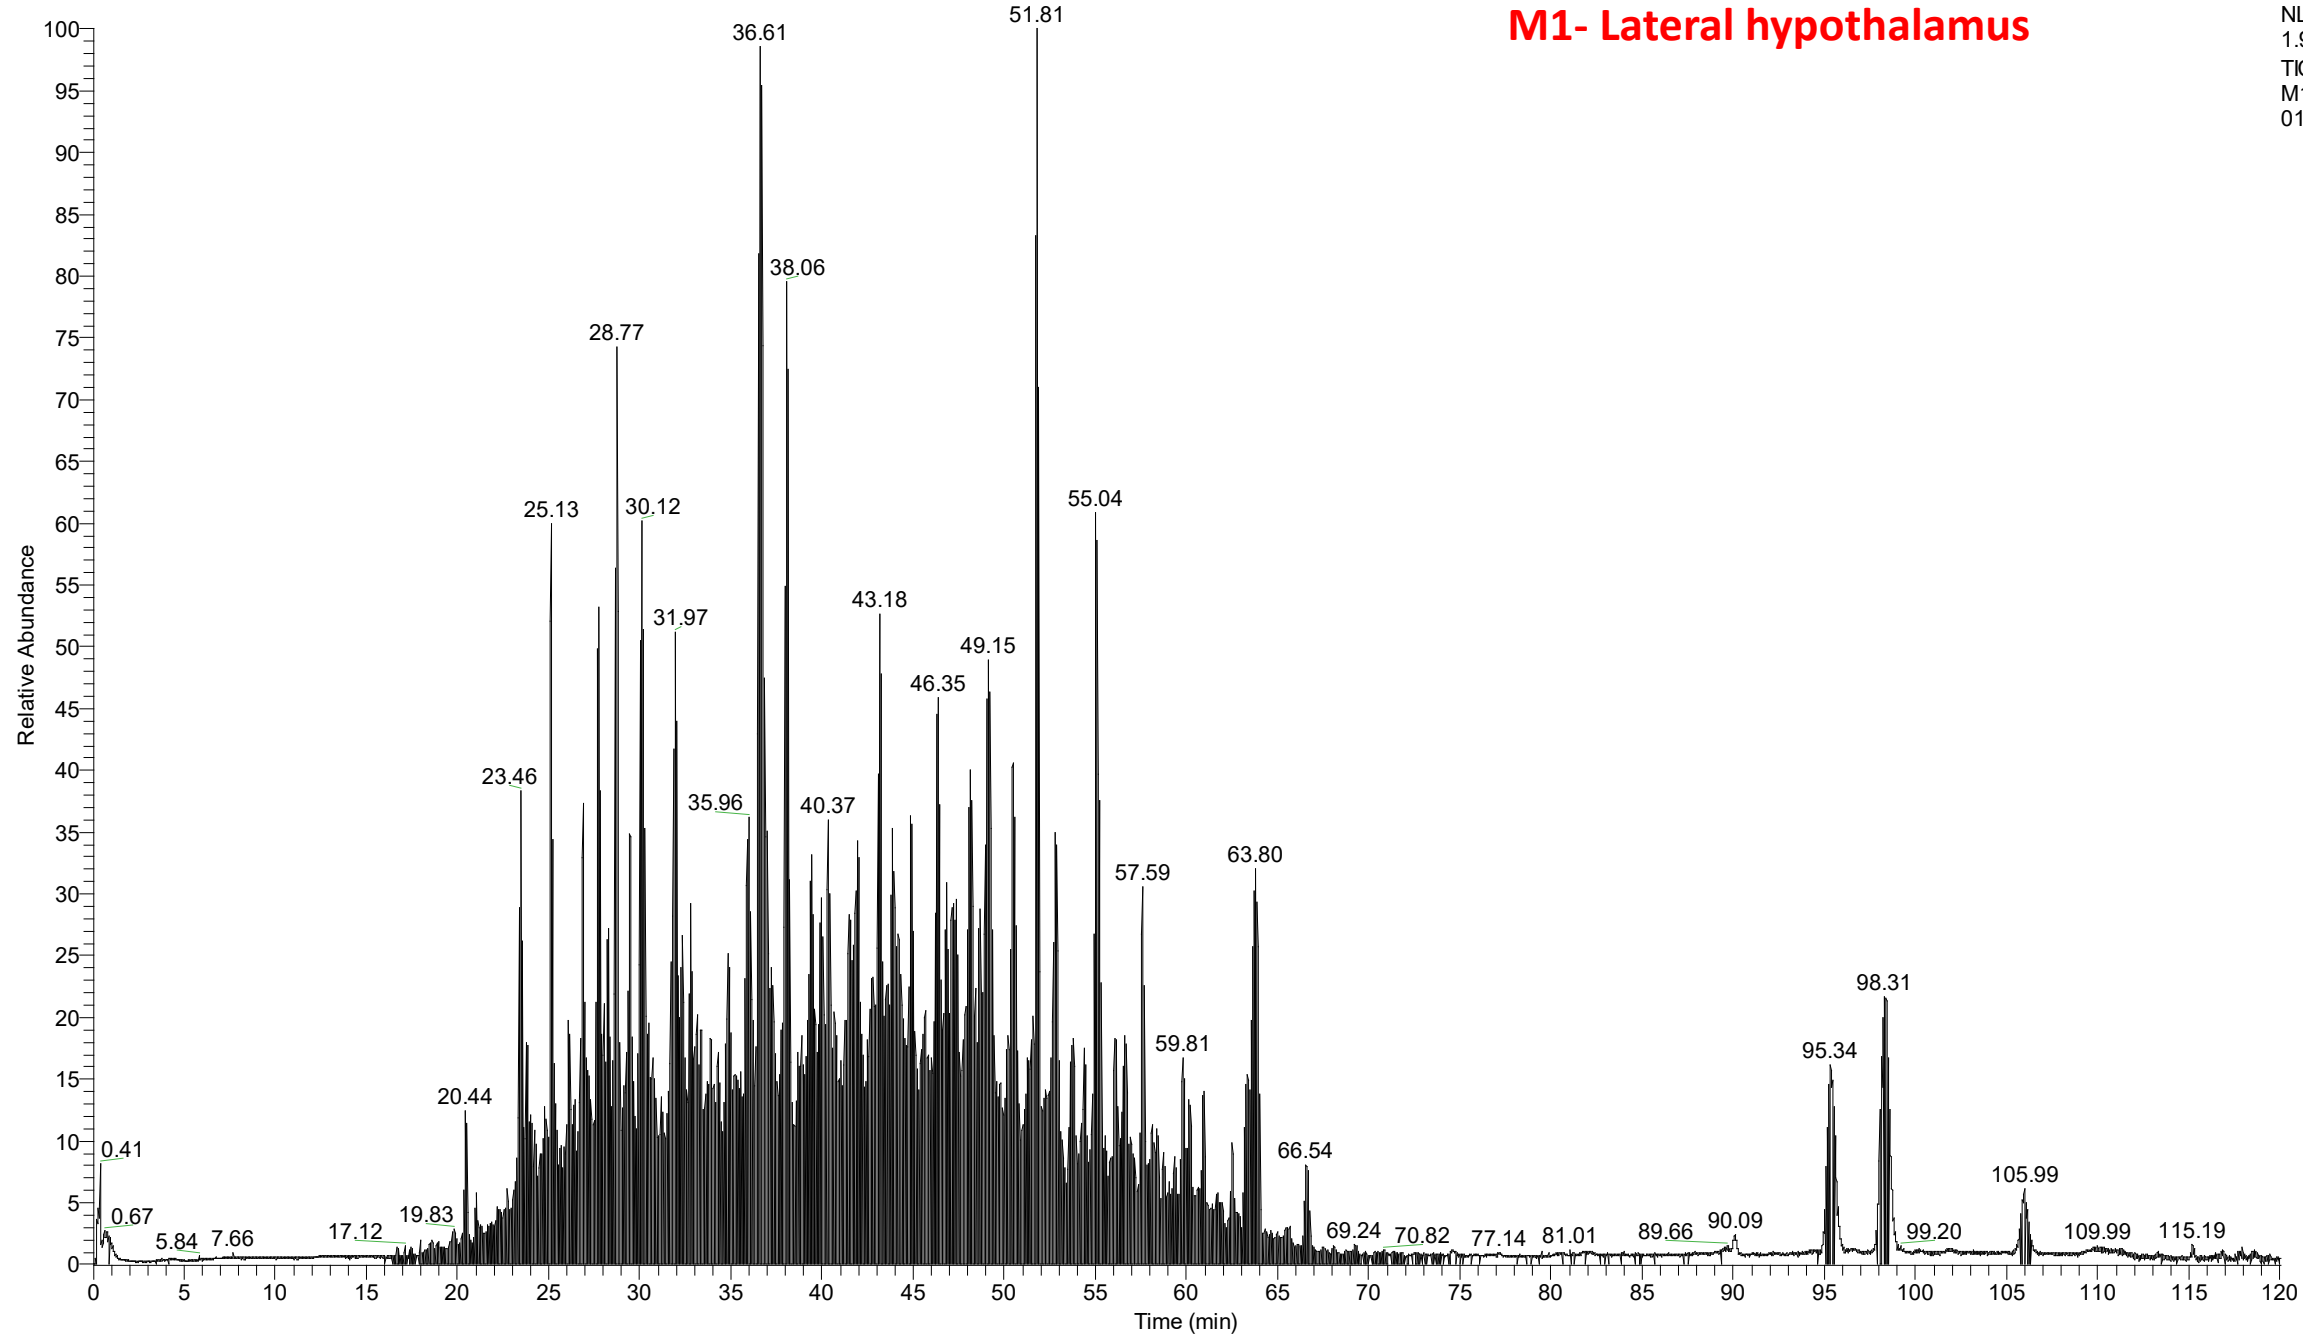

RT: 0.00 - 120.00

# M2- Lateral hypothalamus

NL:  
2.17E9  
TIC MS  
M2\_08012  
017\_01

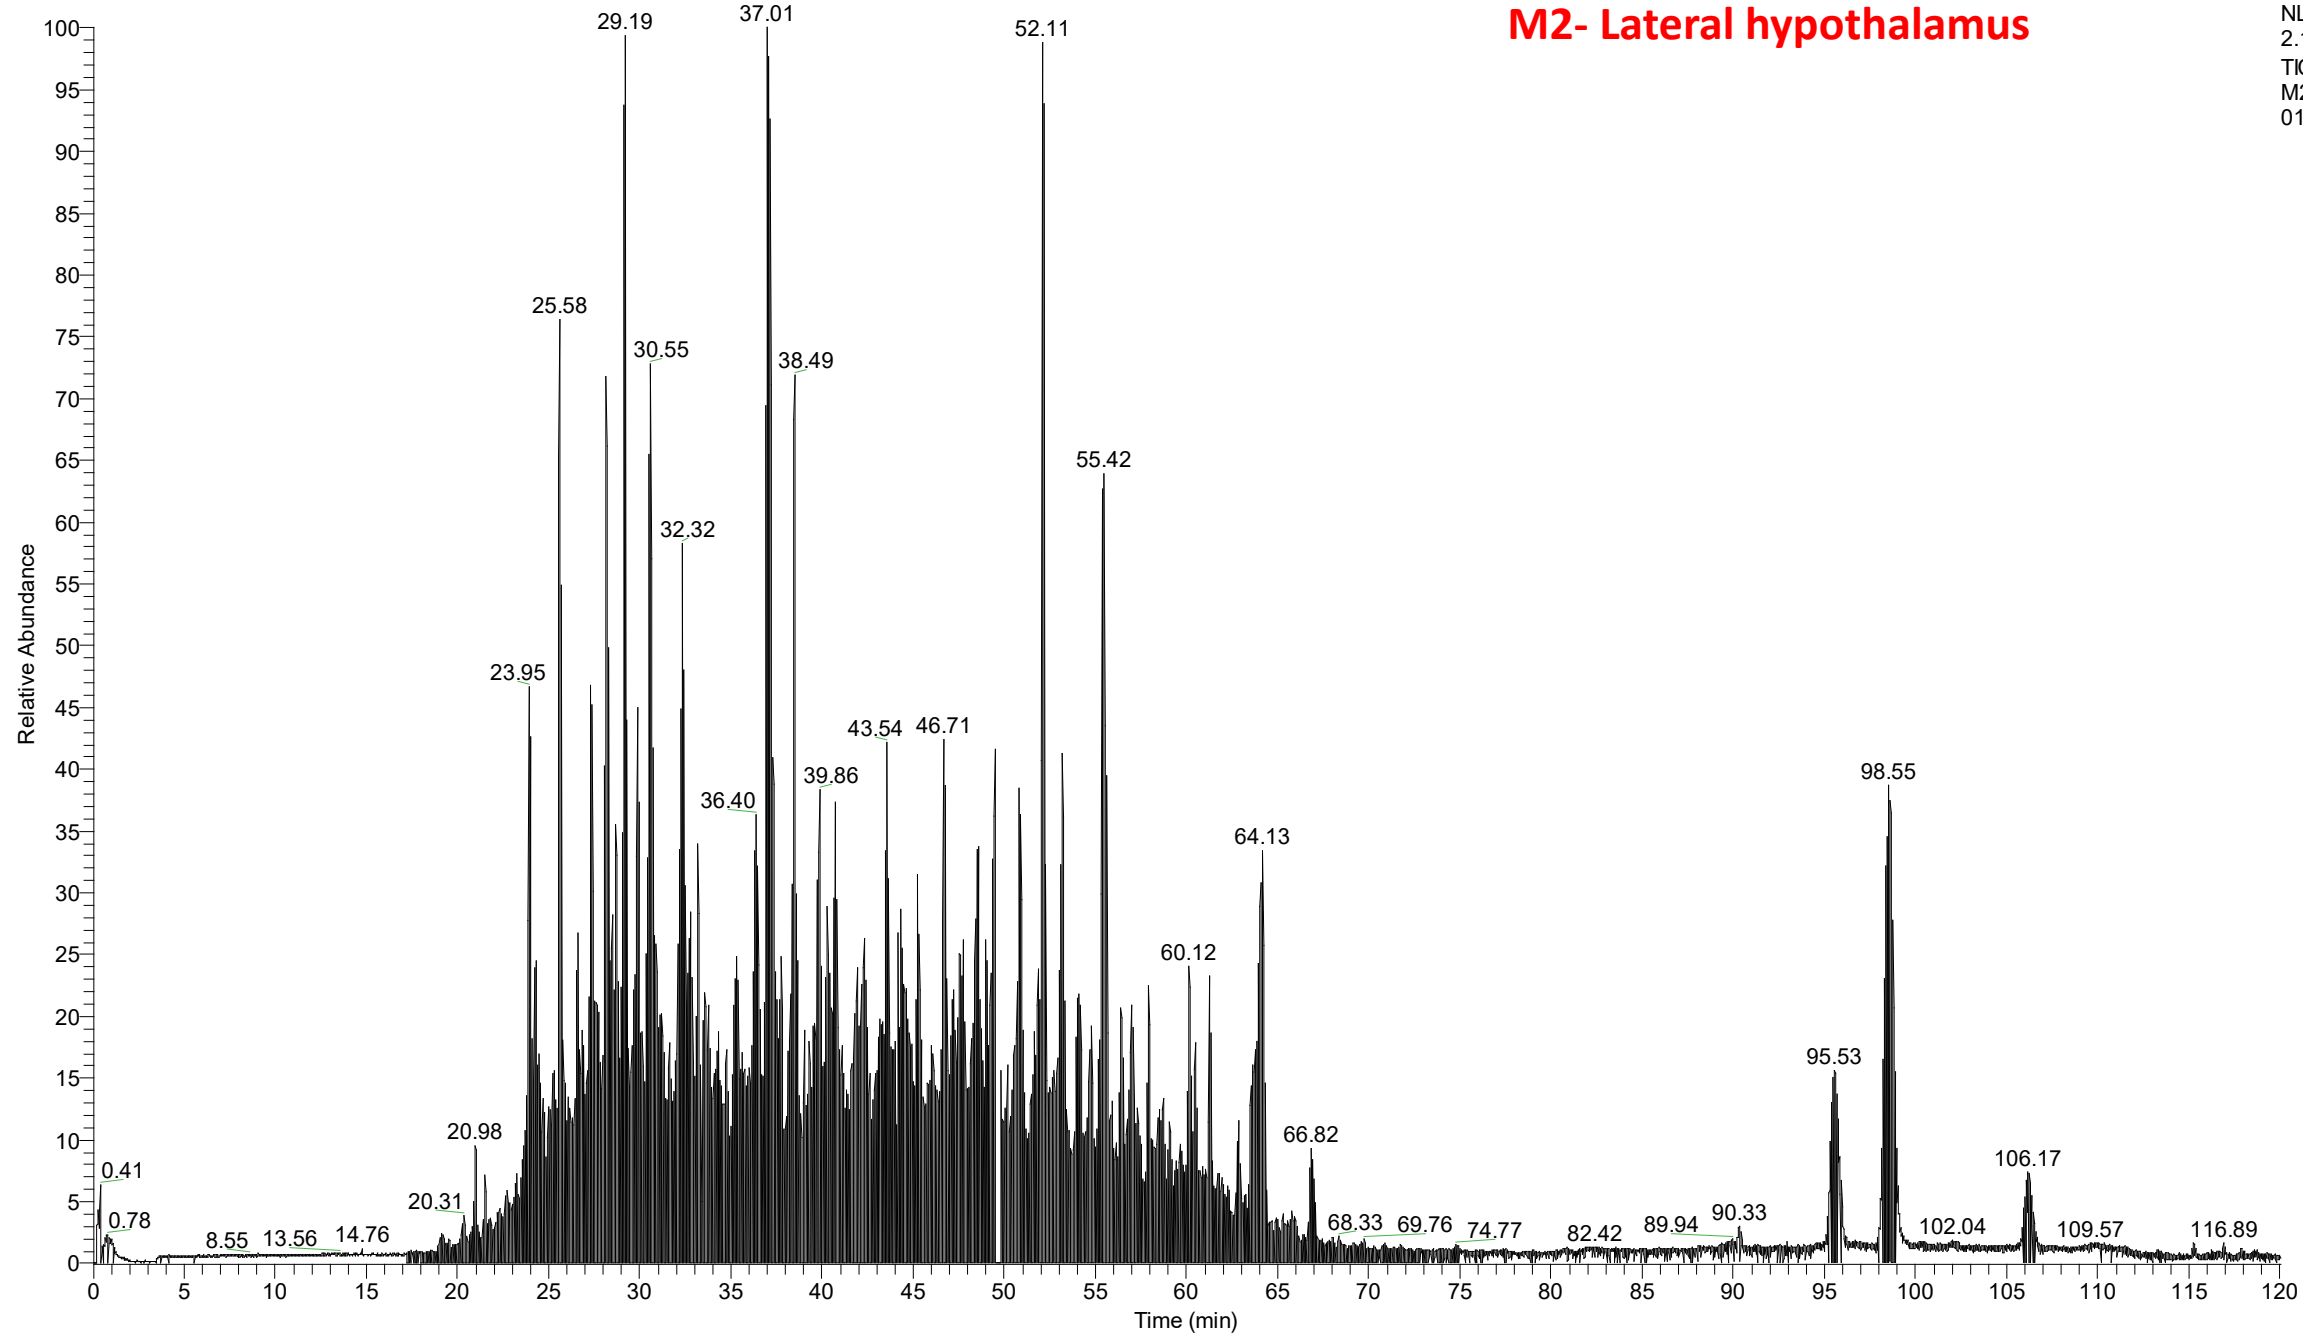

RT: 0.00 - 120.00

# M3- Lateral hypothalamus

NL:  
2.13E9  
TIC MS  
M3\_08022  
017\_01

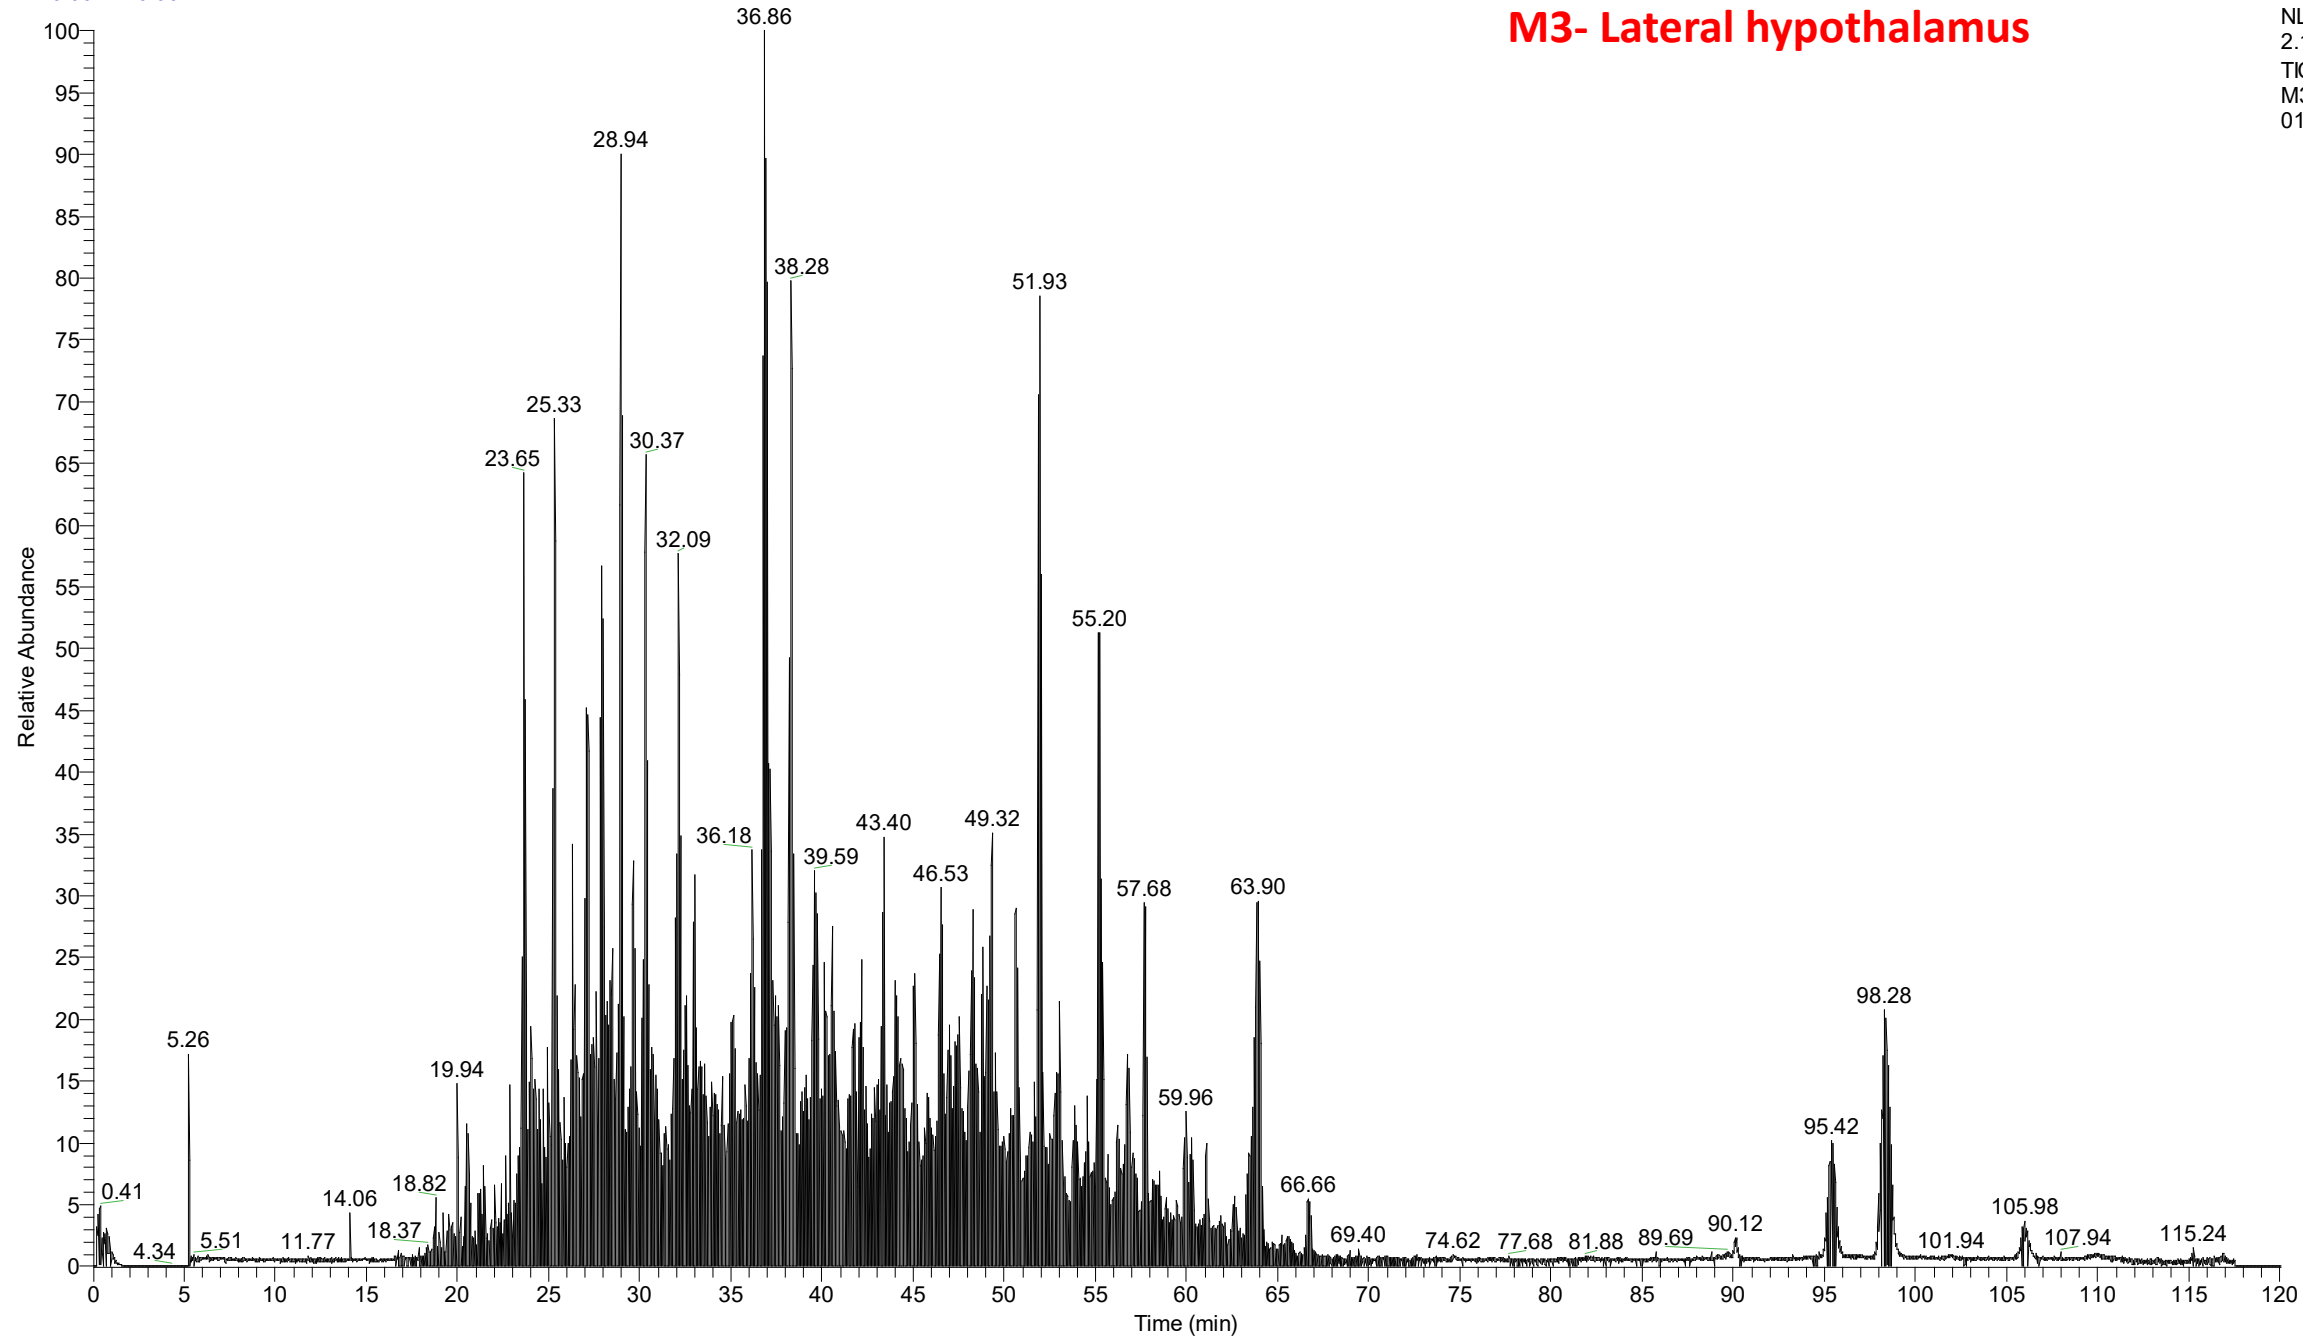

RT: 0.00 - 120.00

# M4- Lateral hypothalamus

NL:  
2.54E9  
TIC MS  
M4\_08022  
017\_01

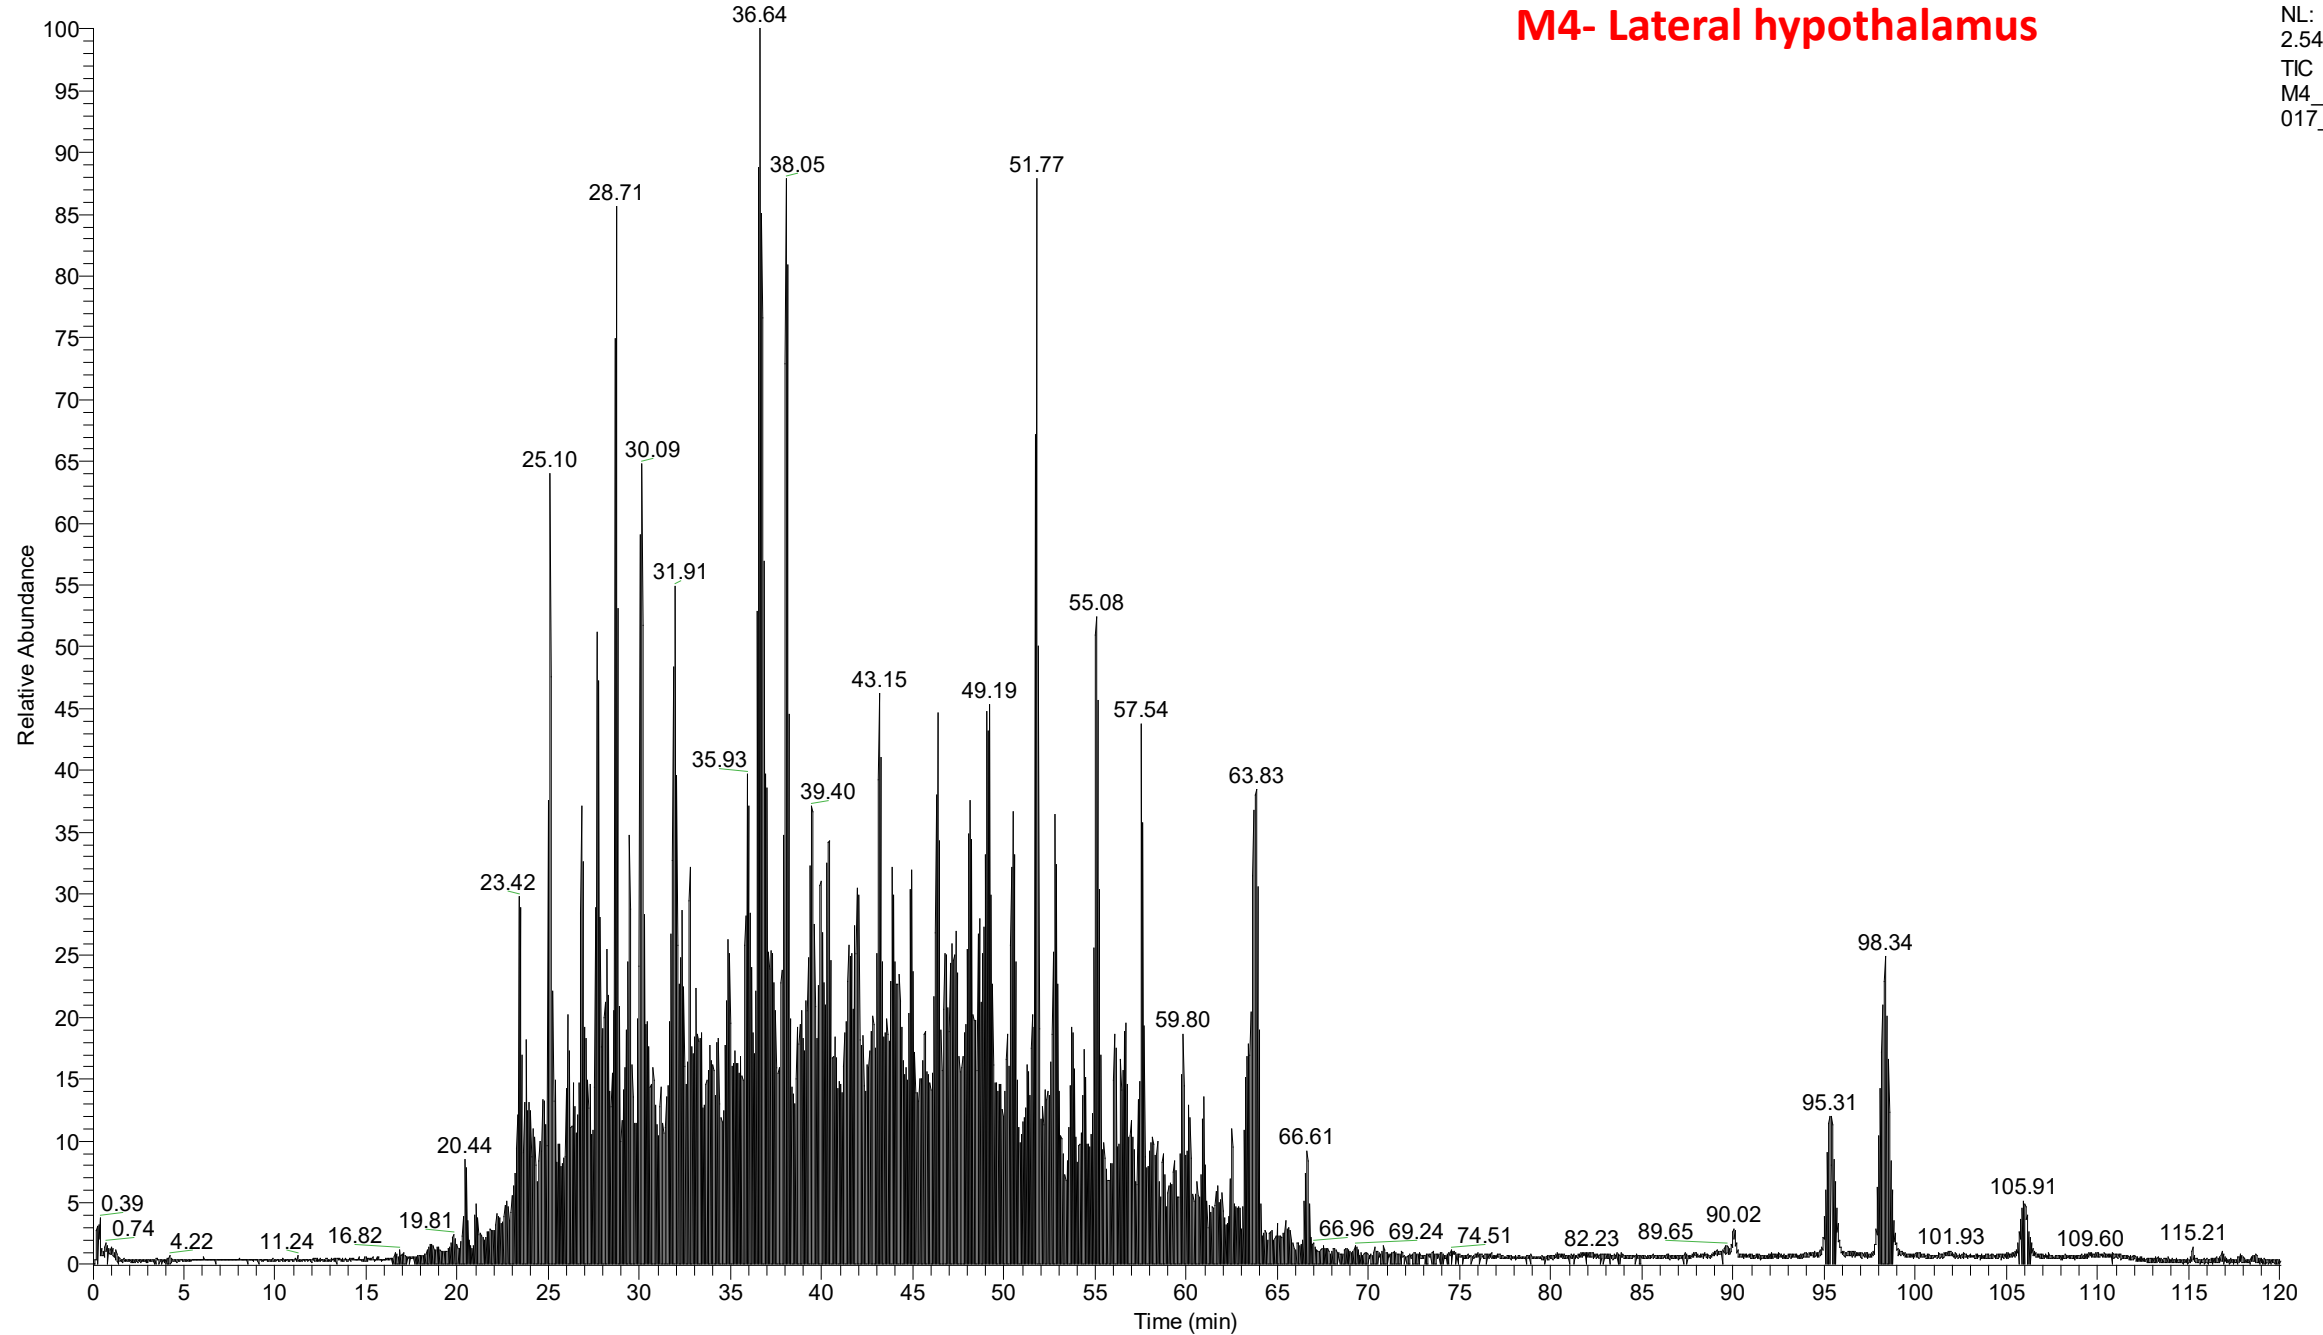

RT: 0.00 - 120.00

# M5- Lateral hypothalamus

NL:  
2.02E9  
TIC MS  
M5\_08022  
017\_01

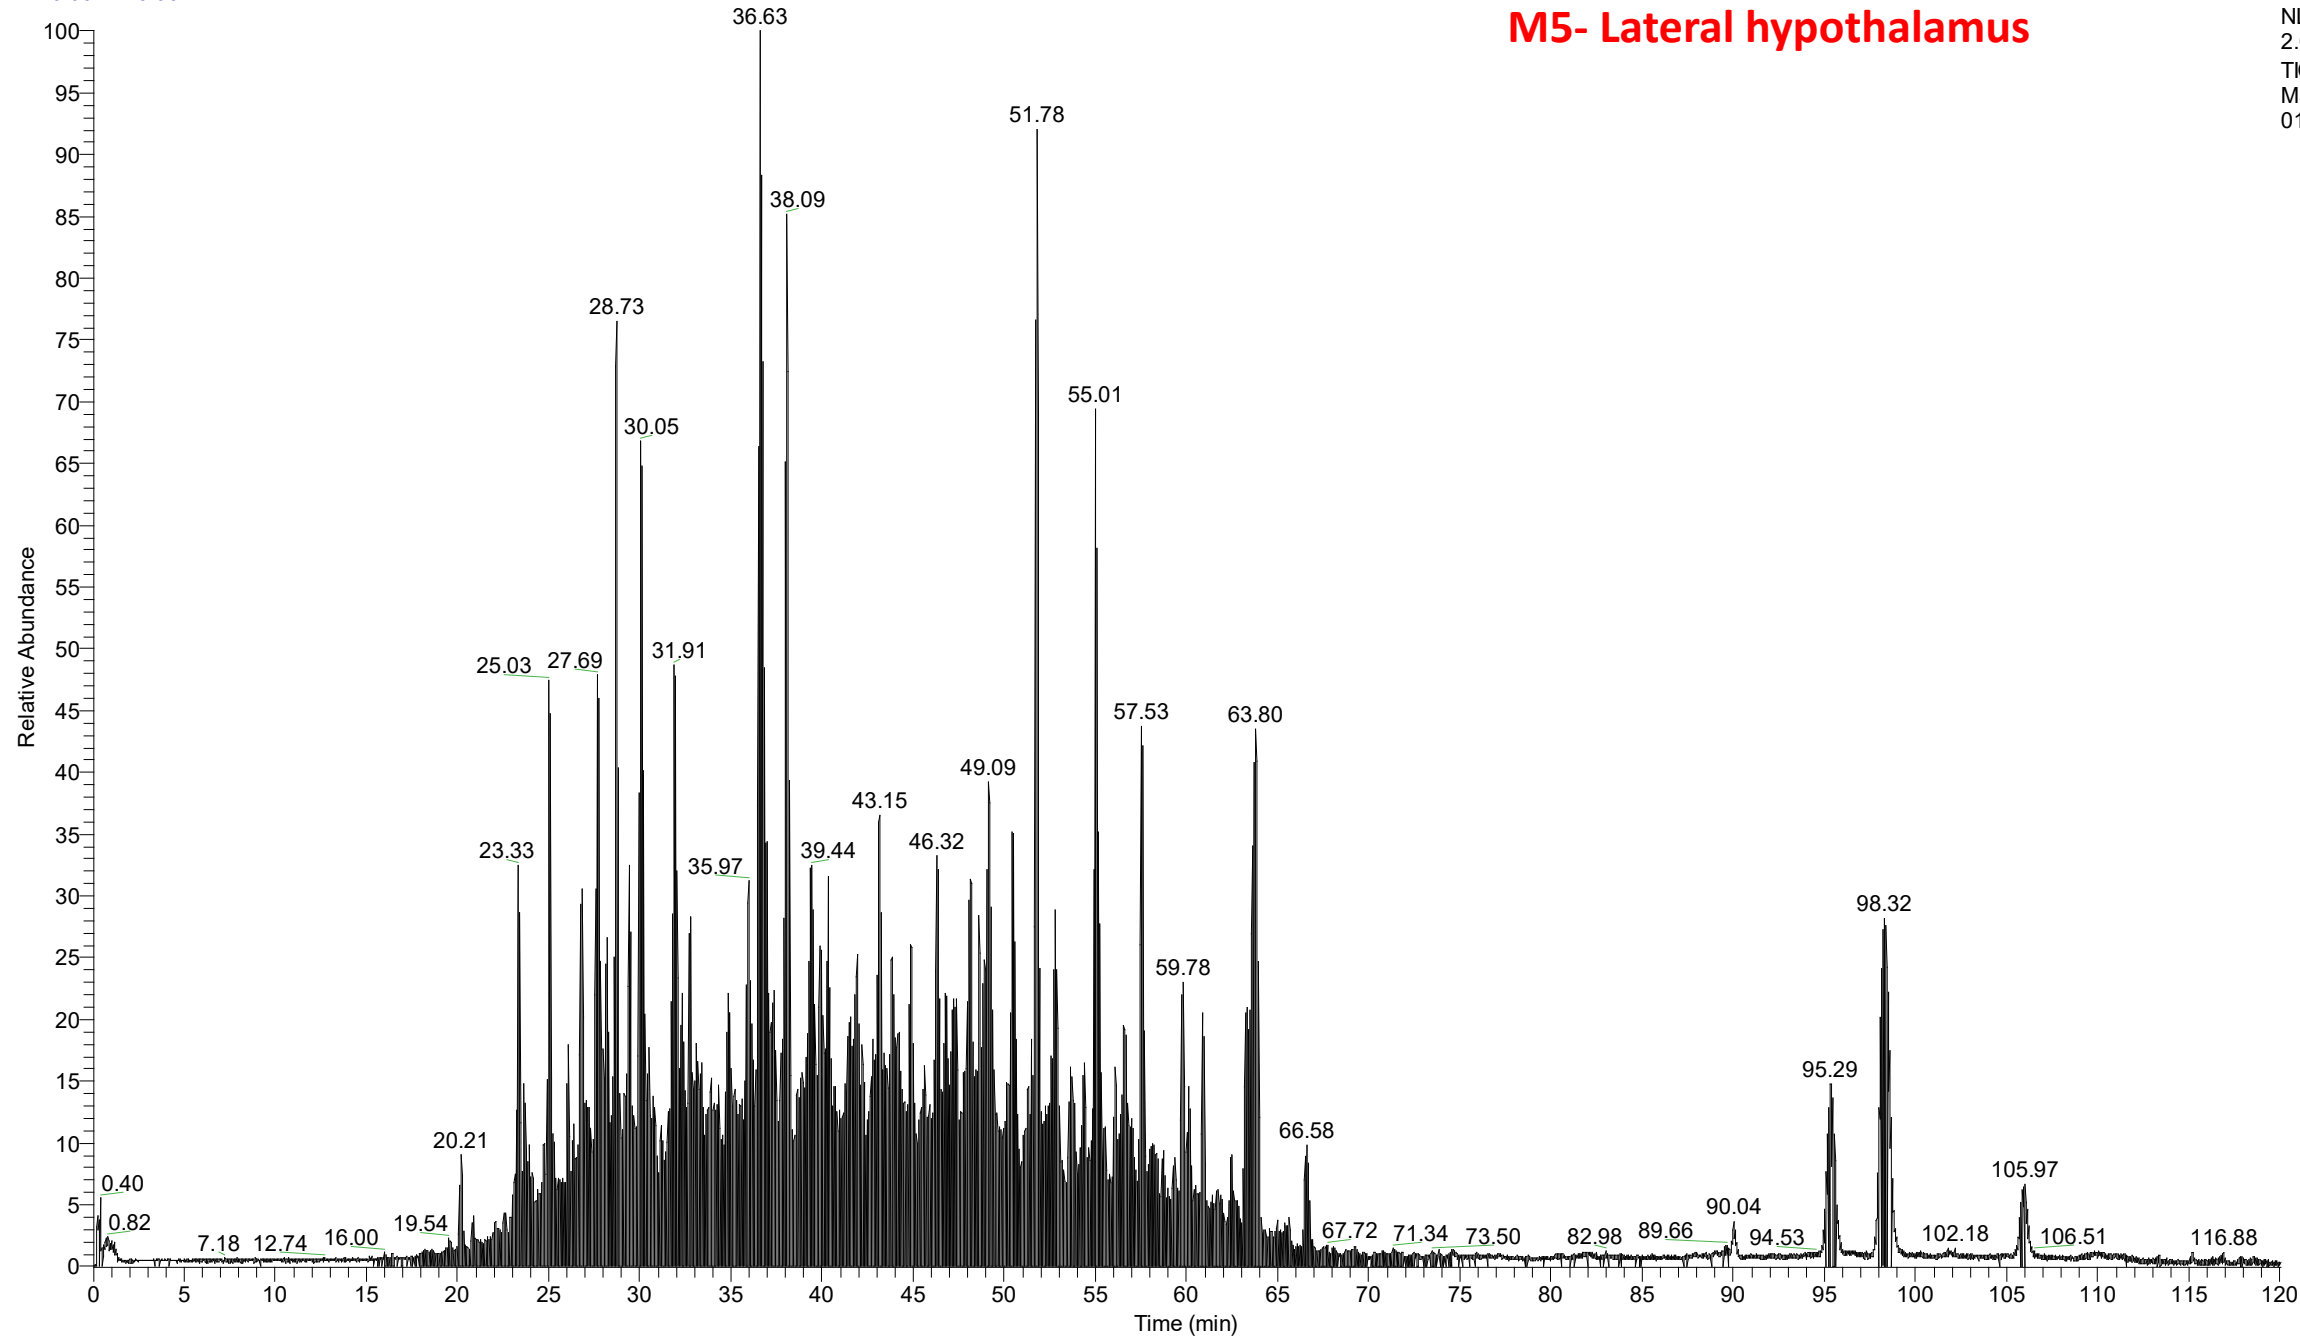

RT: 0.00 - 120.00

# M6- Lateral hypothalamus

NL:  
2.72E9  
TIC MS  
M6\_08022  
017\_01

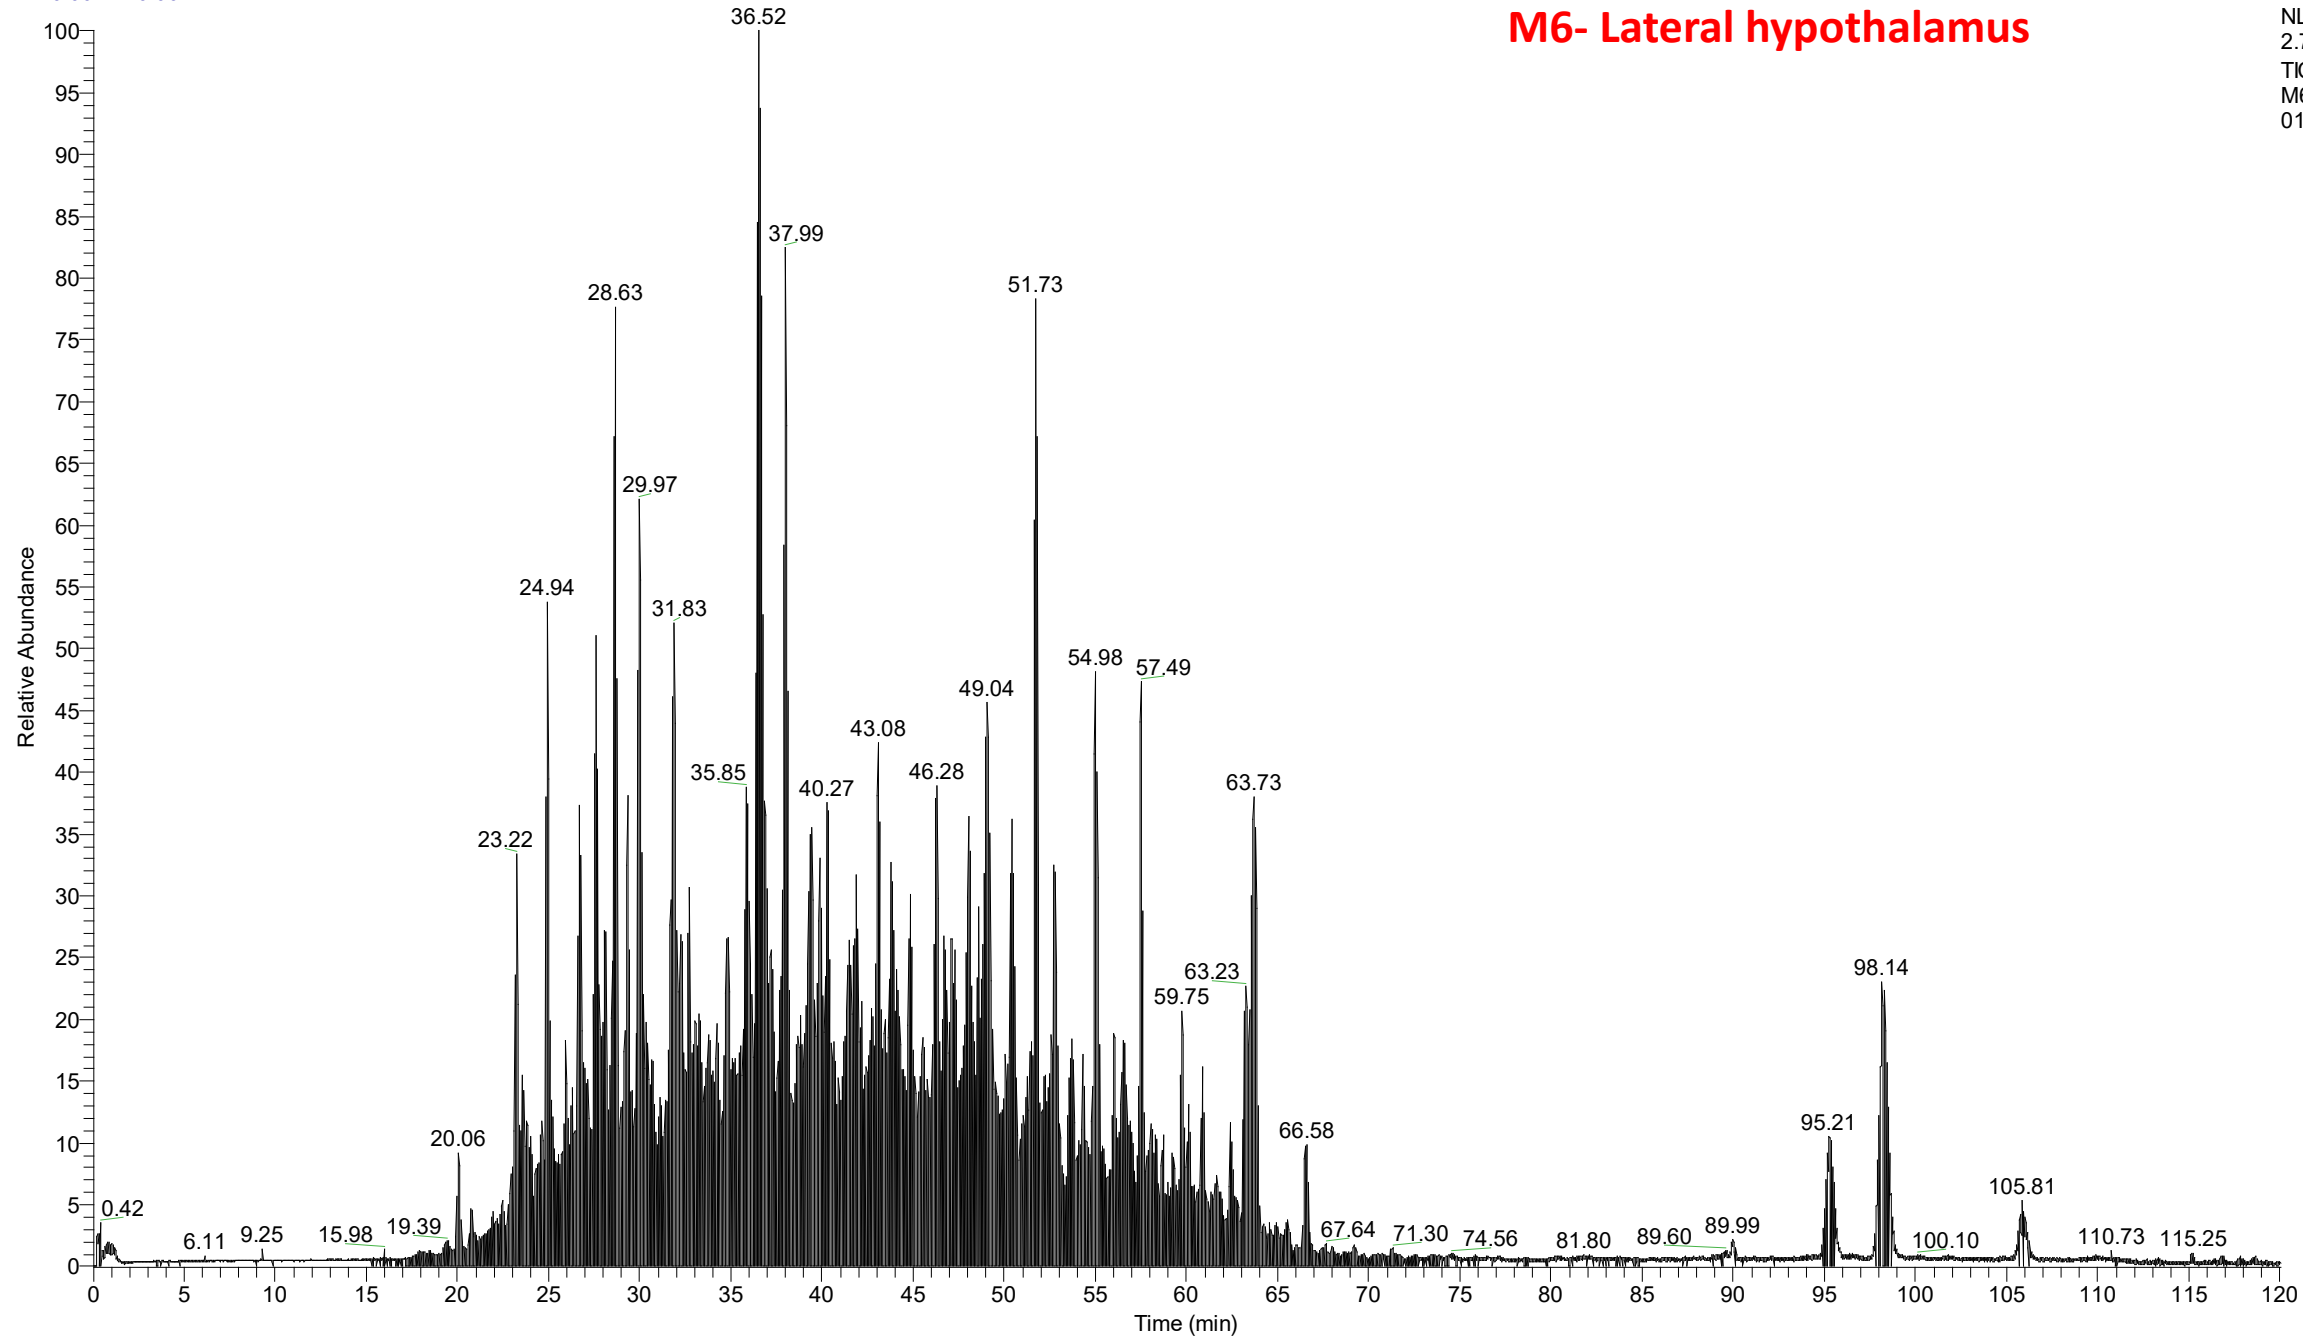

RT: 0.00 - 120.00

# S1- Lateral hypothalamus

NL:  
2.67E9  
TIC MS  
S1\_080320  
17\_01

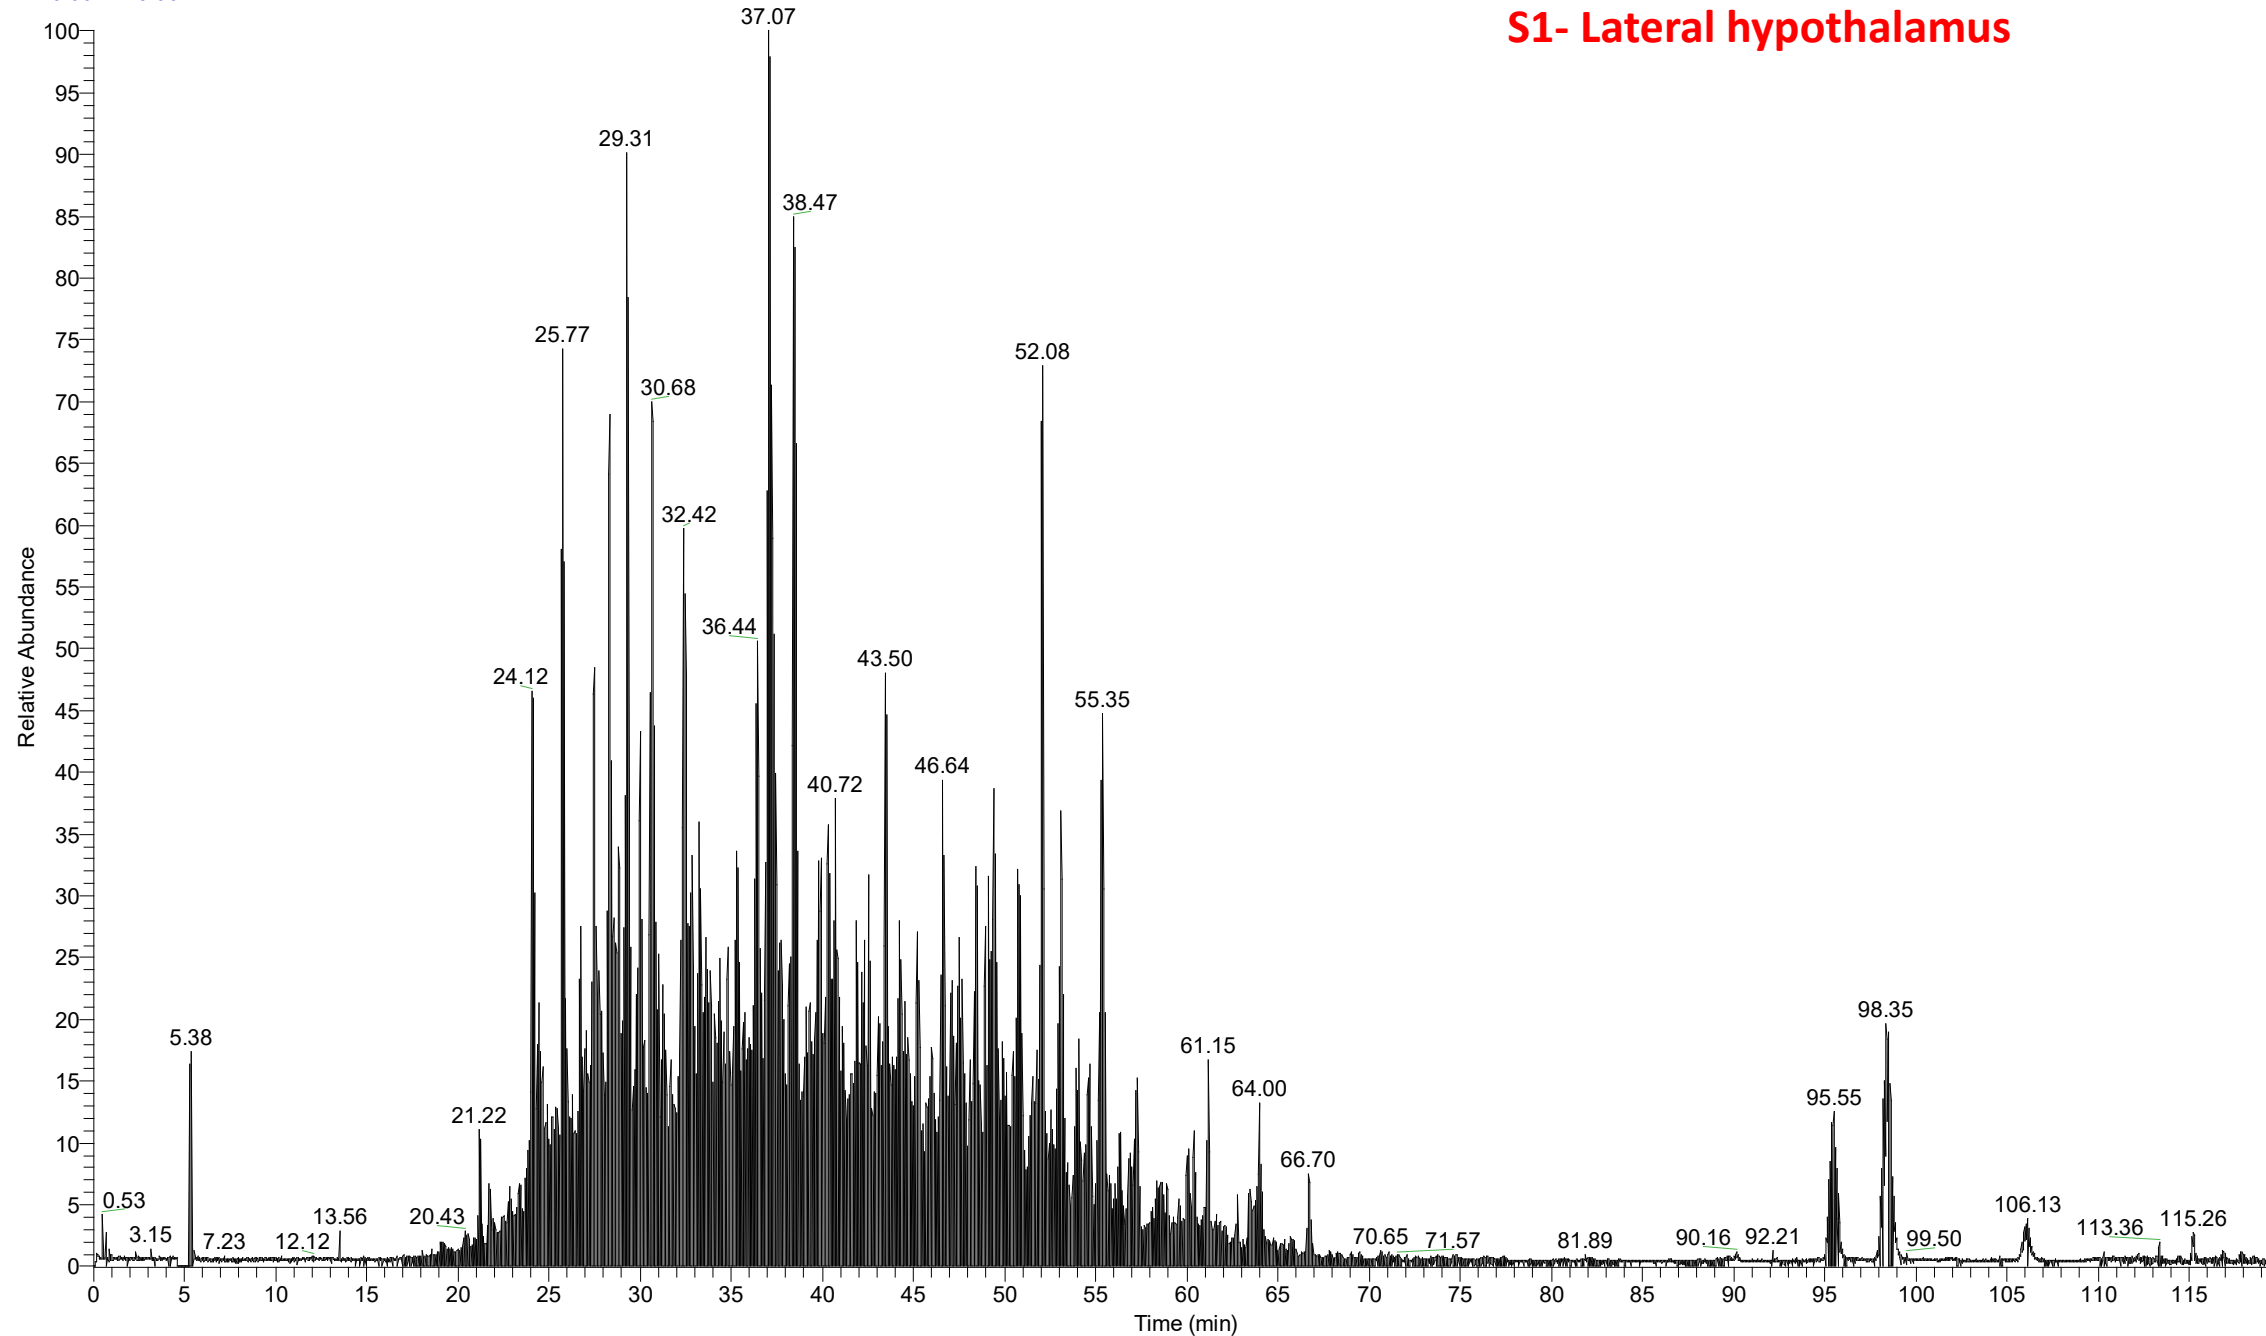



RT: 0.00 - 120.00

# S2- Lateral hypothalamus

NL:  
2.84E9  
TIC MS  
S2\_080320  
17\_01

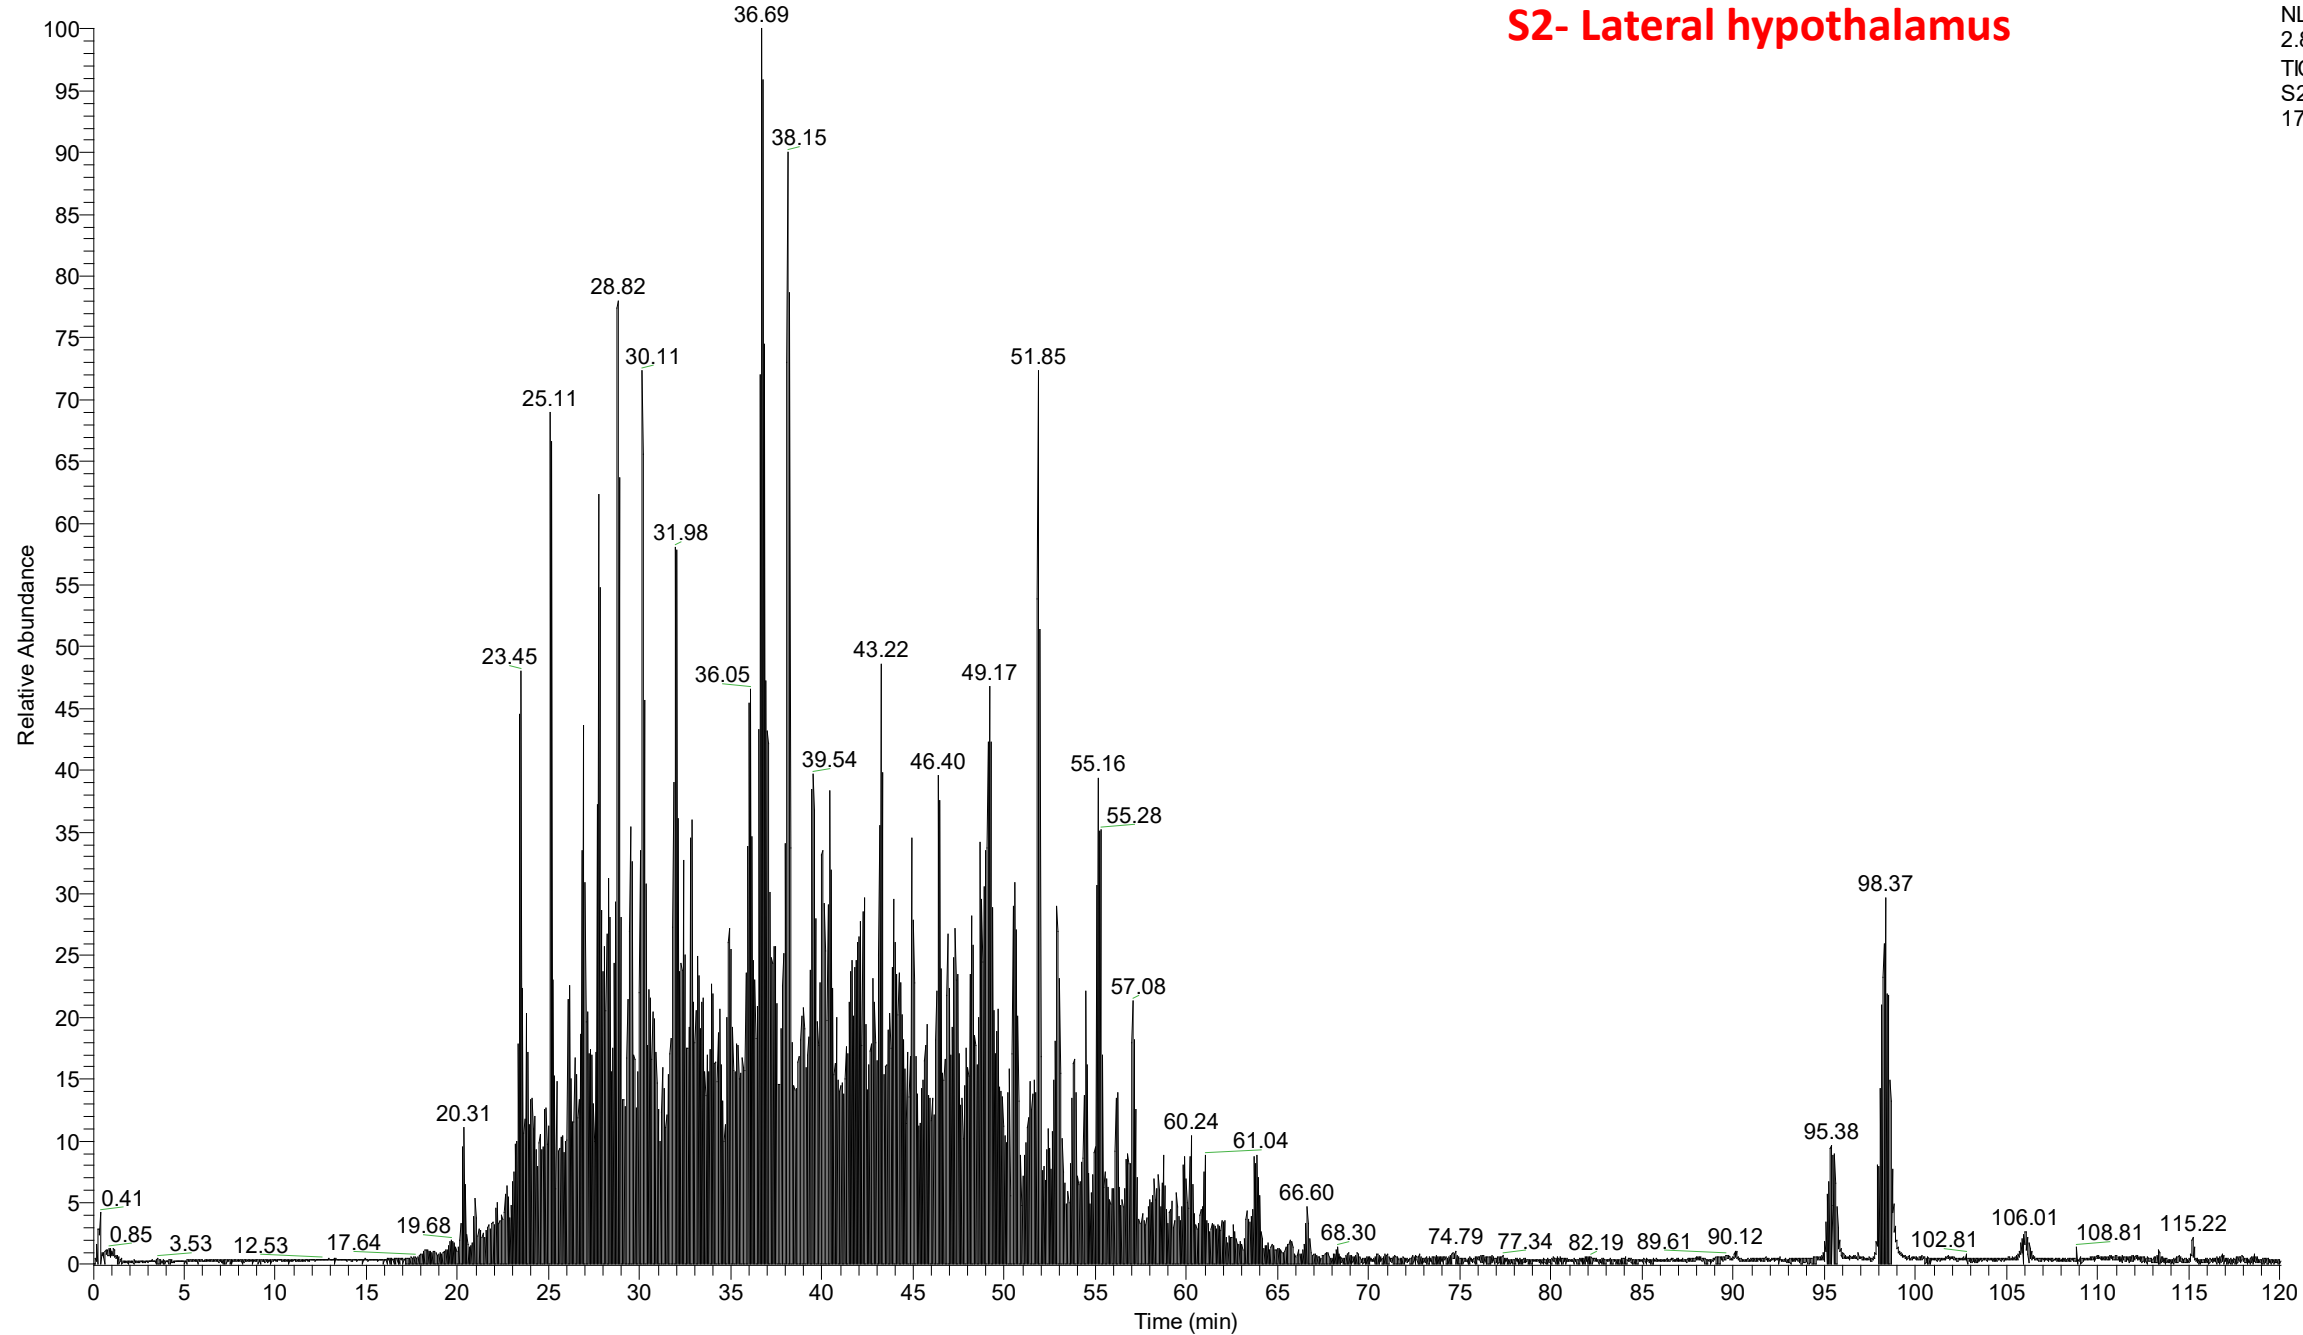

RT: 0.00 - 120.00

# S3- Lateral hypothalamus

NL:  
2.71E9  
TIC MS  
S3\_080320  
17\_01

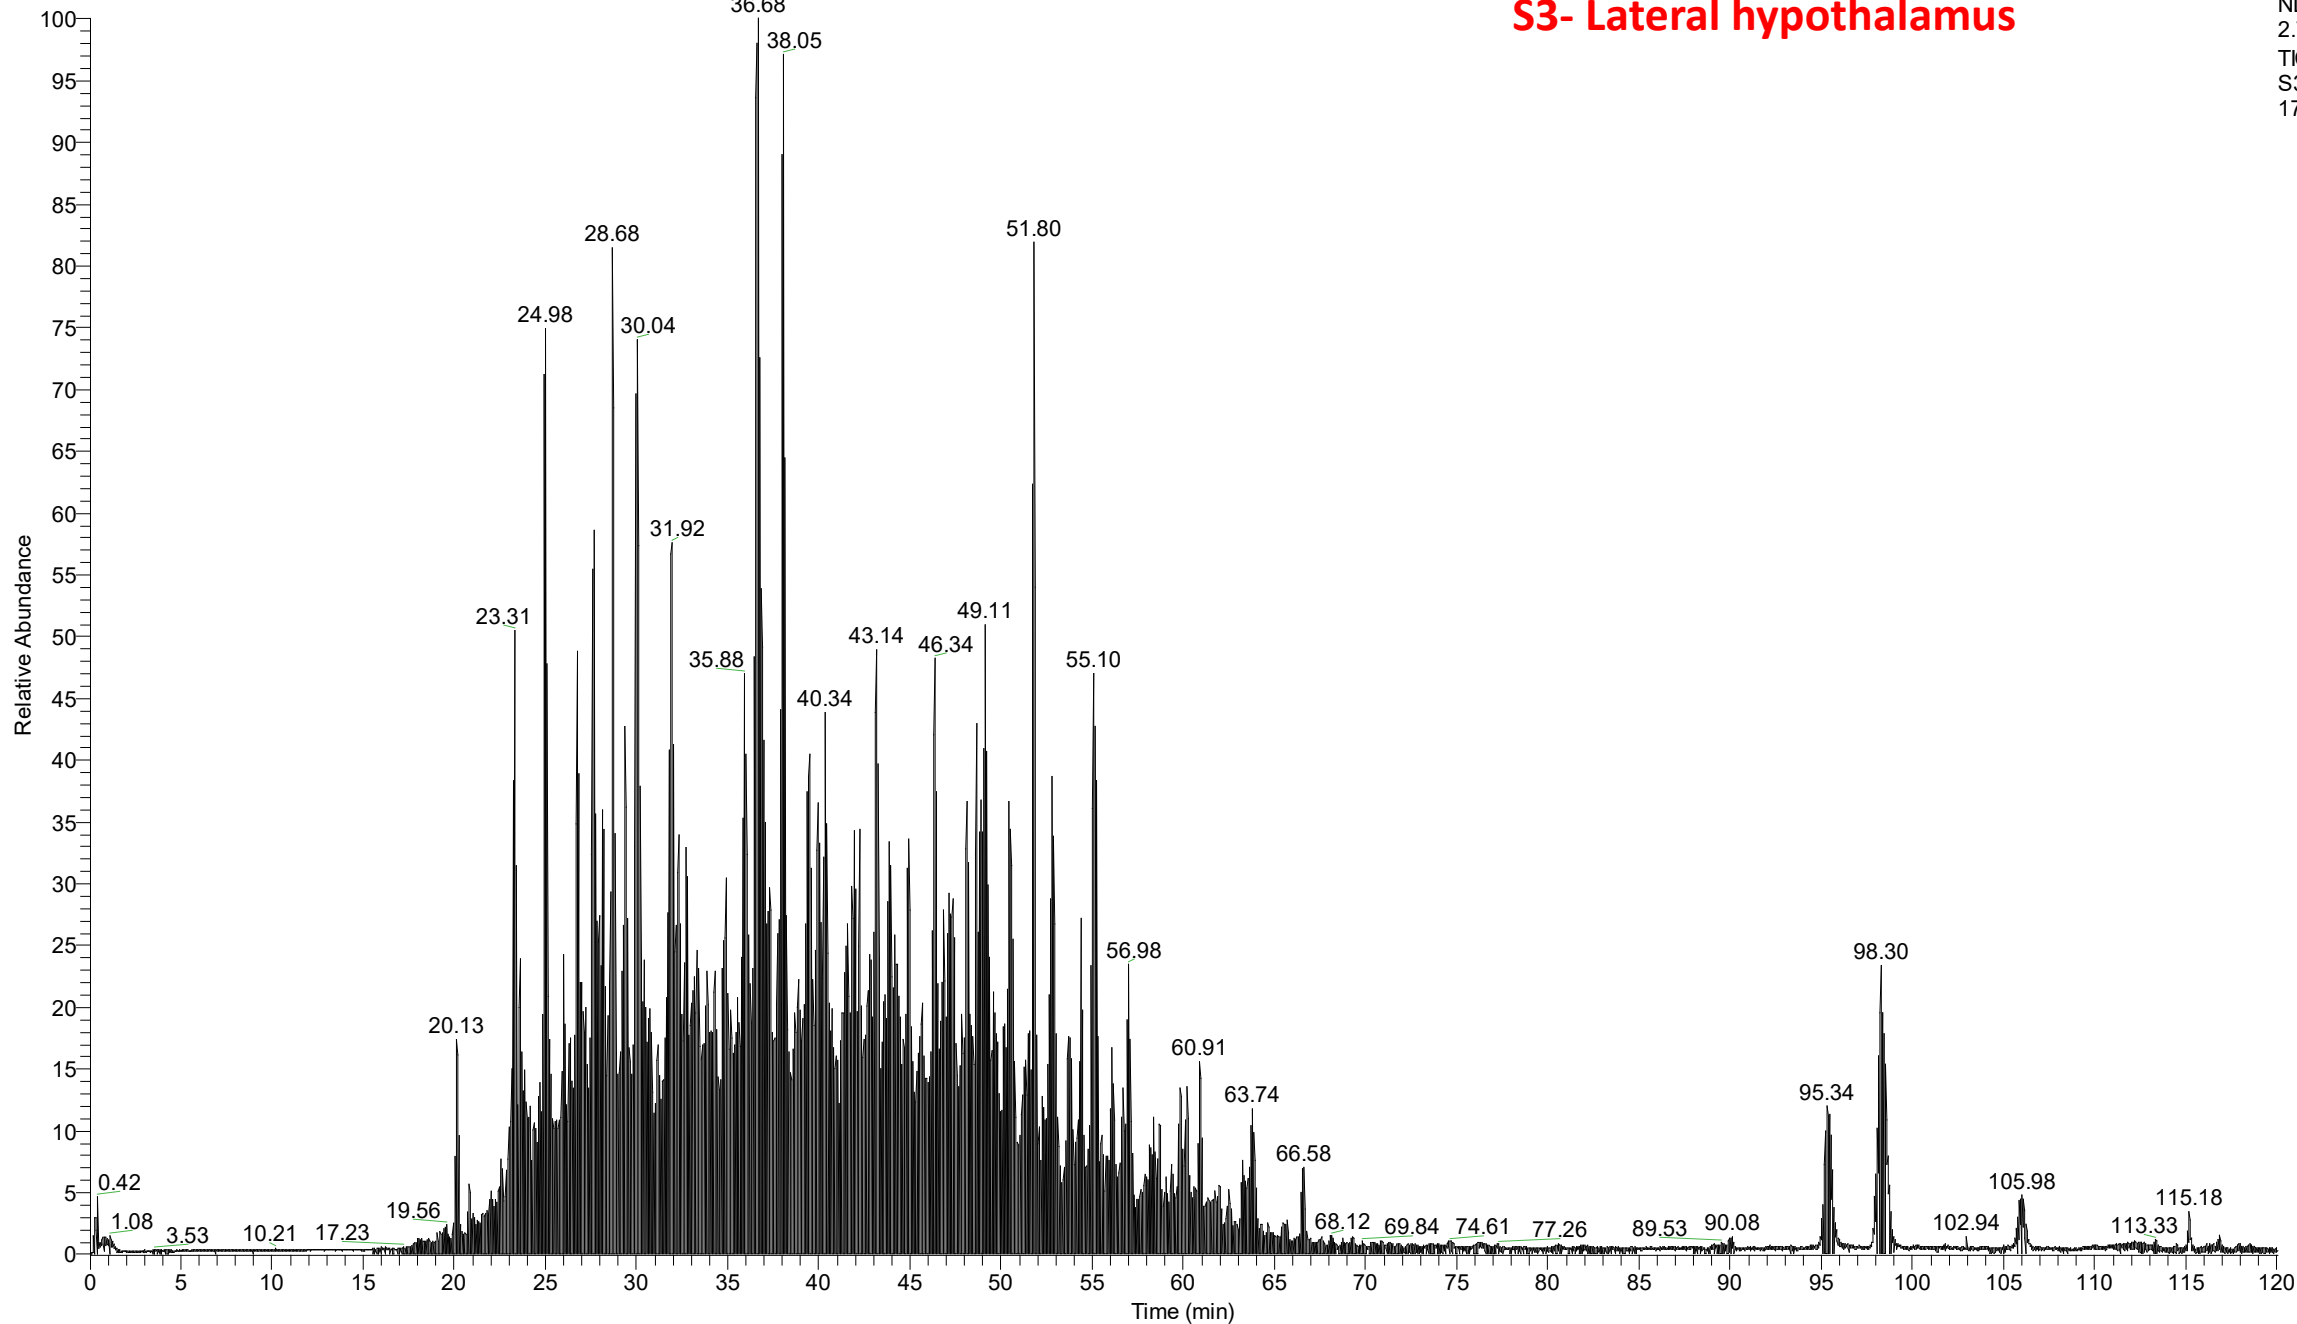

RT: 0.00 - 120.00

# S4- Lateral hypothalamus

NL:  
2.83E9  
TIC MS  
S4\_080320  
17\_01

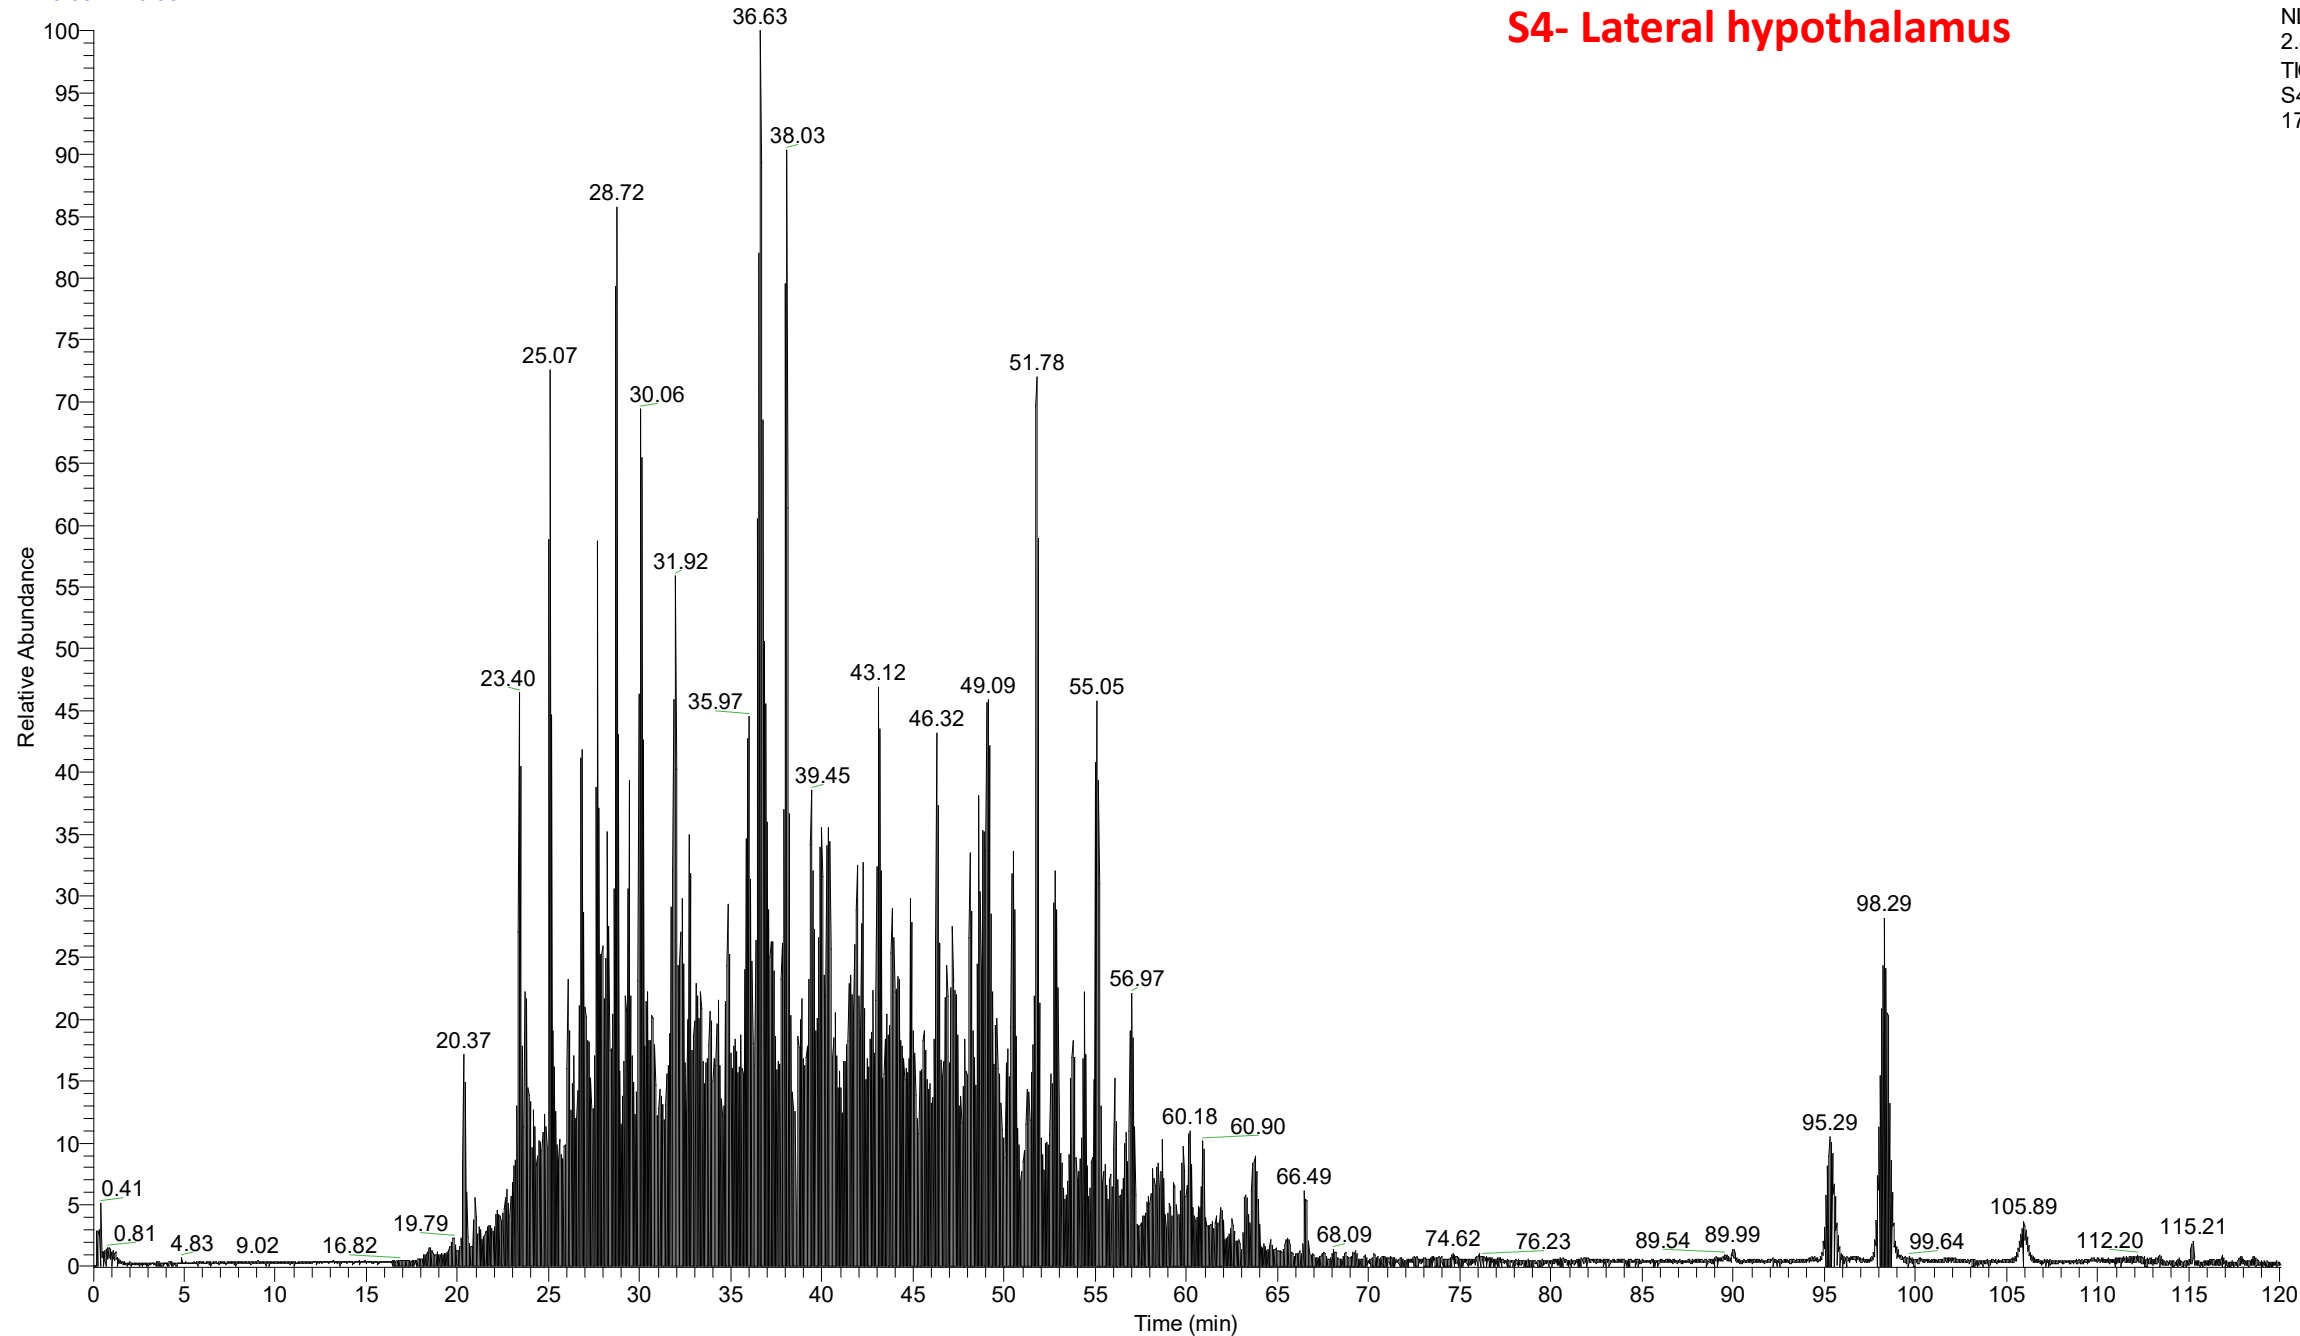

RT: 0.00 - 120.00

# S5- Lateral hypothalamus

NL:  
2.43E9  
TIC MS  
S5\_080320  
17\_01

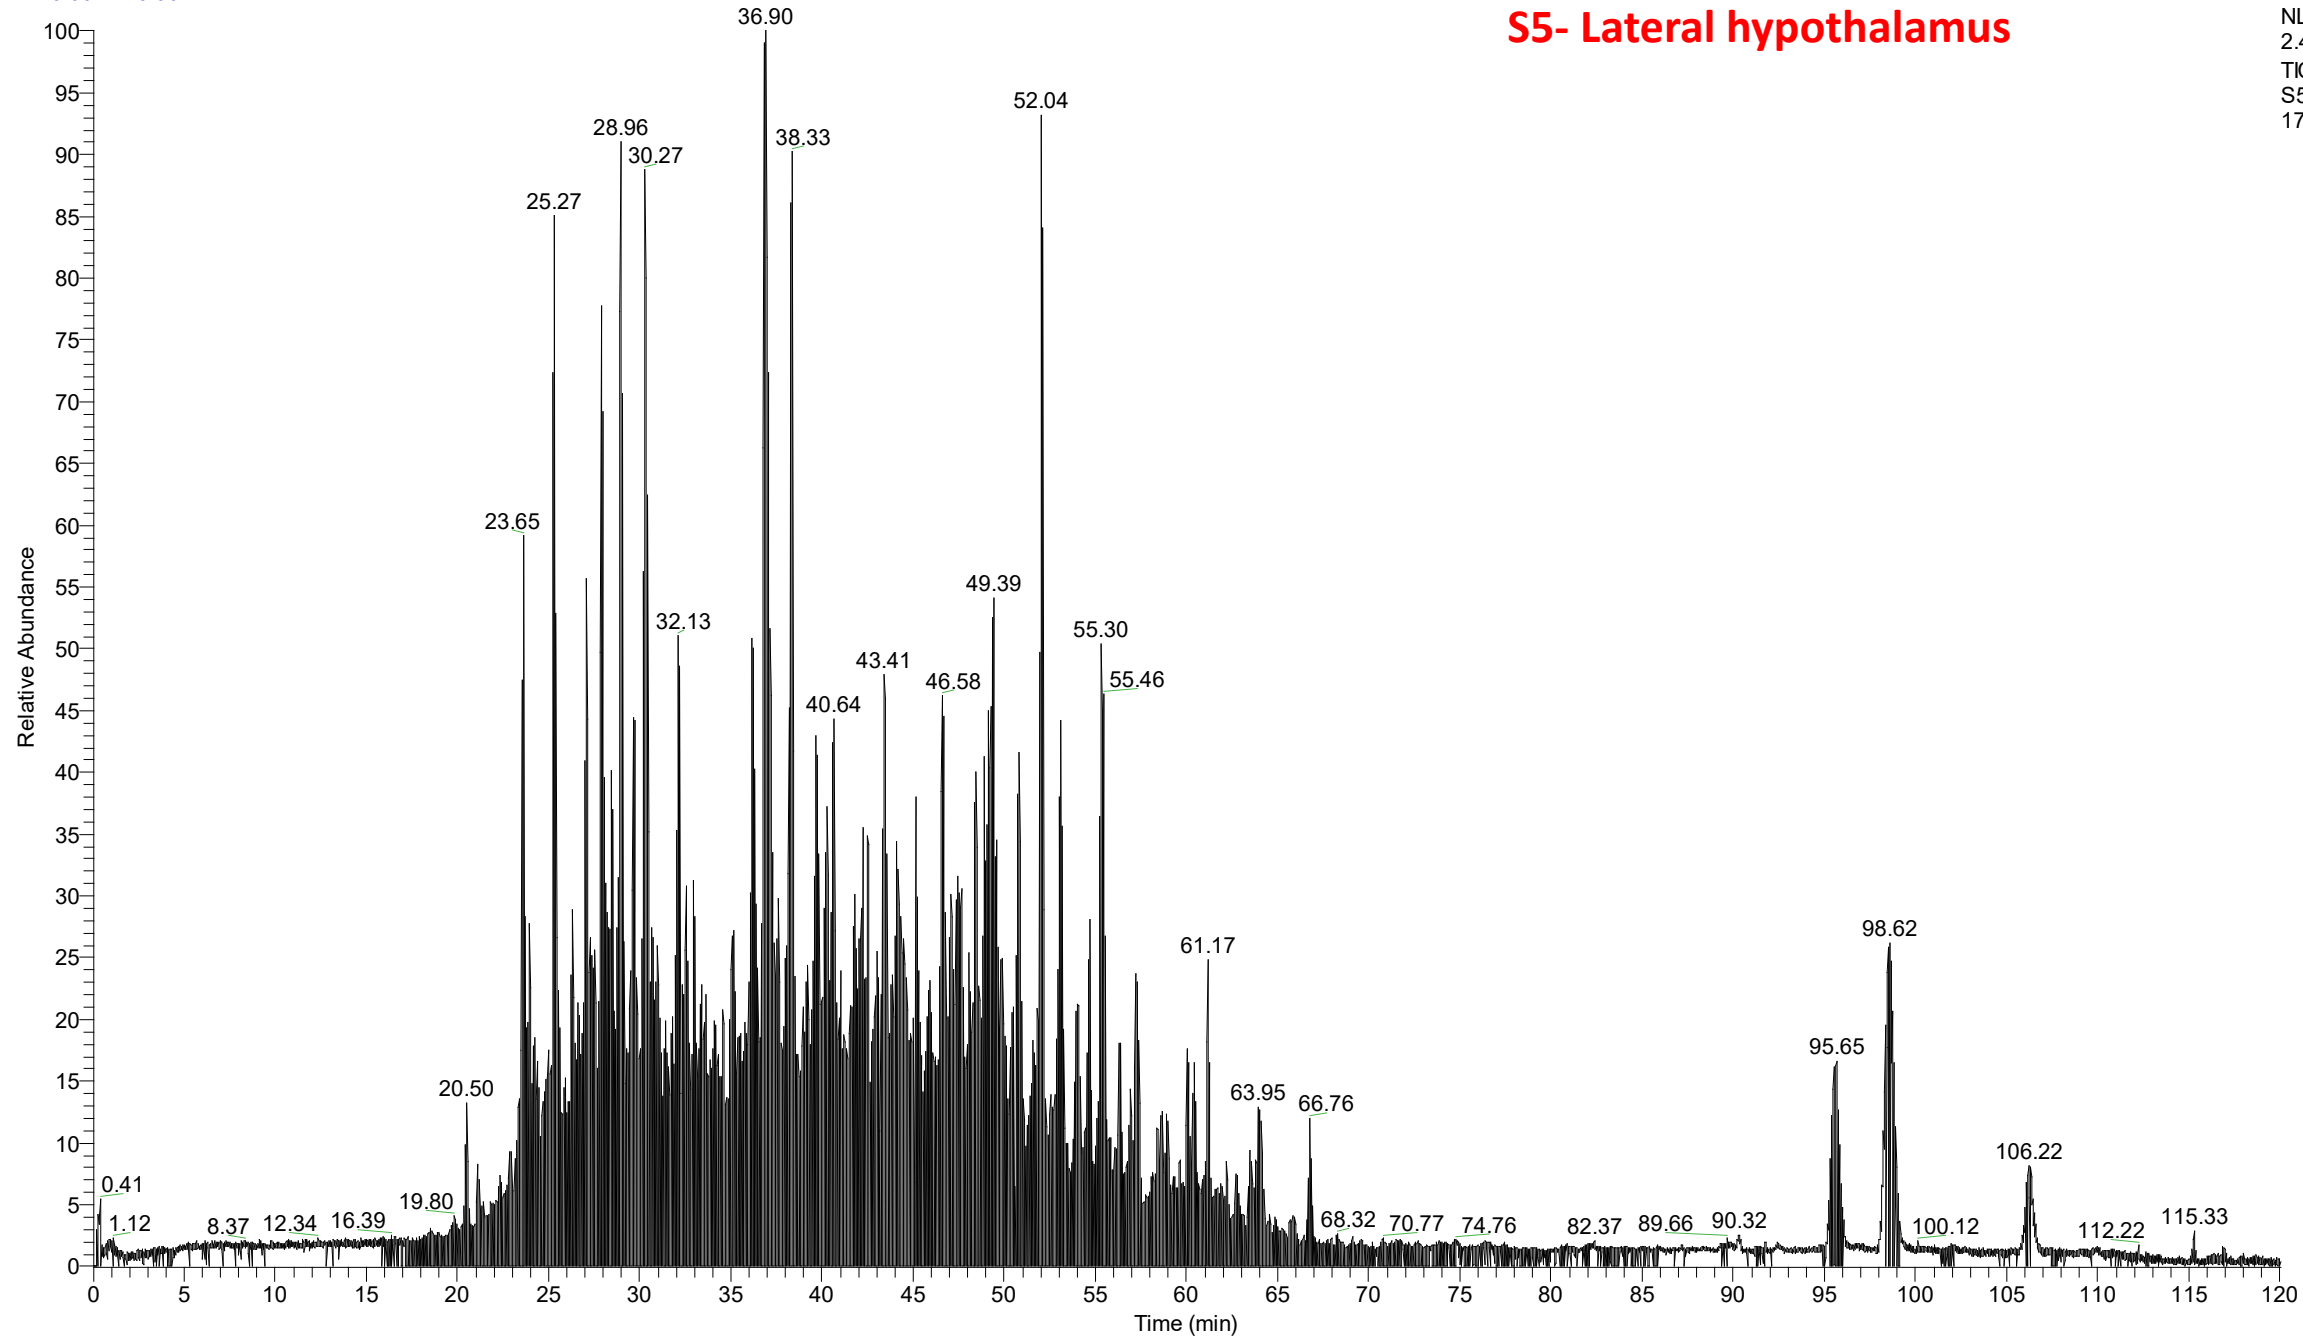

RT: 0.00 - 120.00

# S6- Lateral hypothalamus

NL:  
2.79E9  
TIC MS  
S6\_080320  
17\_01

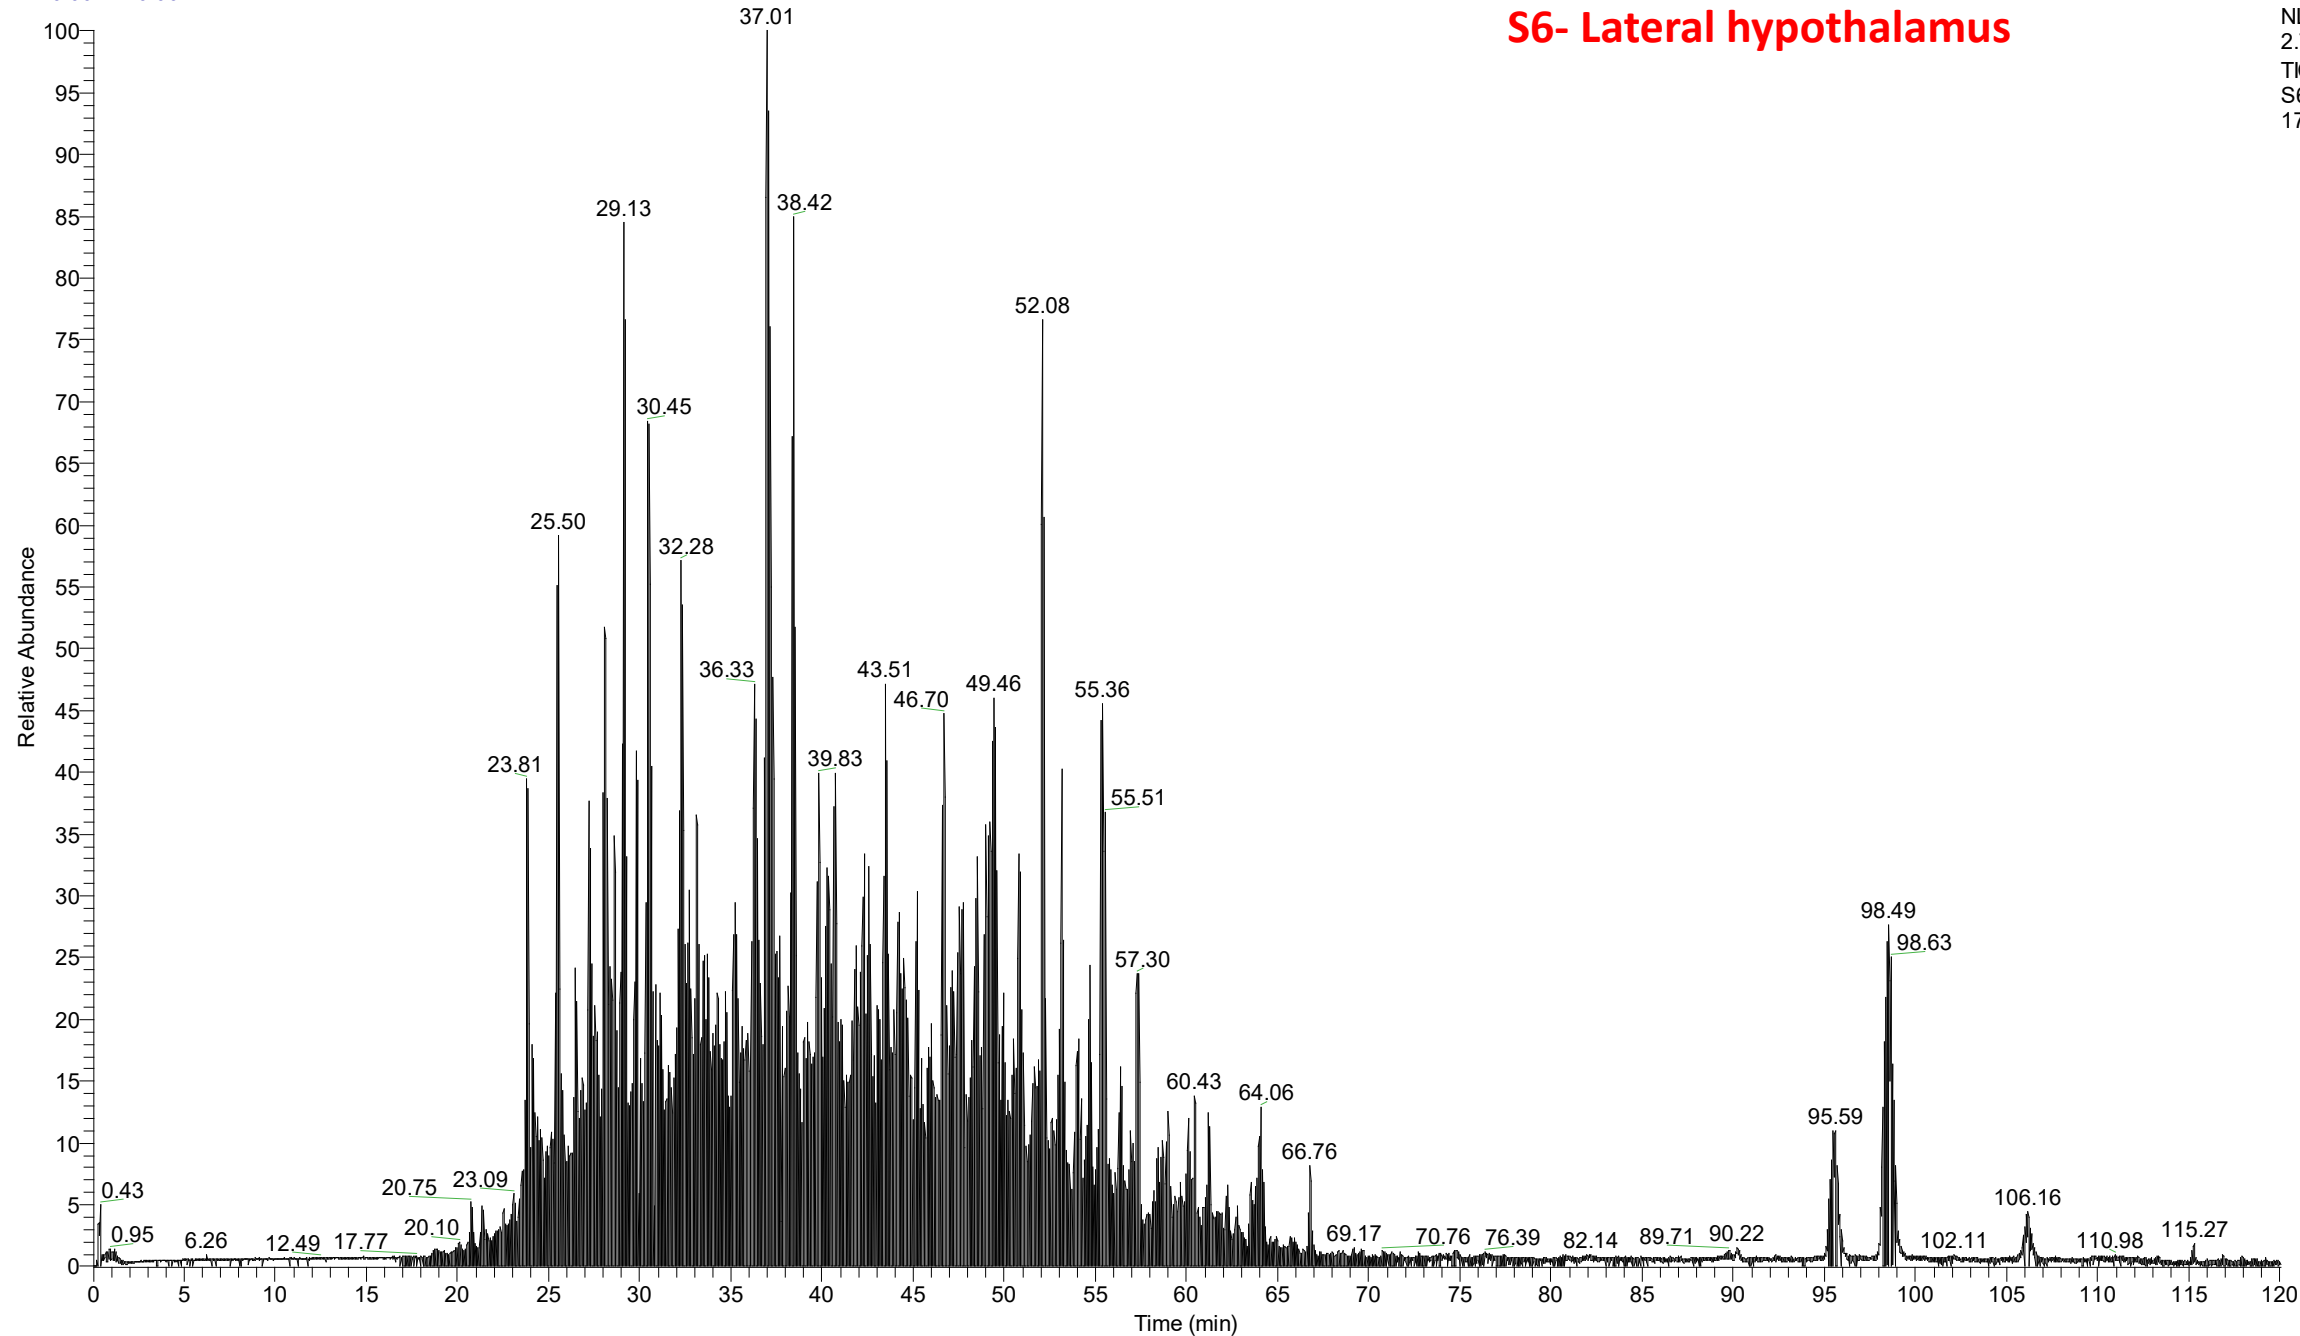

Supplement: mmc11.pdf [file mmc11.pdf]
