# Supplementary material for: Comprehensive Glycomic and Proteomic Analysis of Mouse Striatum and Lateral Hypothalamus Following Repeated Exposures to Cocaine or Methamphetamine
Source: PubMed Central journal article supplement (PMC11324981; doi:10.1016/j.mcpro.2024.100803), 2024-06-15
Supplement: mmc12.pdf [file mmc12.pdf]

| Top Canonical Pathways                           |  |          |             |
|--------------------------------------------------|--|----------|-------------|
| Name                                             |  | p-value  | Overlap     |
| Pentose Phosphate Pathway (Non-oxidative Branch) |  | 7.72E-05 | 28.6 % 2/7  |
| Signaling by Rho Family GTPases                  |  | 1.42E-04 | 1.9 % 5/259 |
| Iron homeostasis signaling pathway               |  | 1.45E-04 | 2.9 % 4/137 |
| Phagosome Maturation                             |  | 1.95E-04 | 2.7 % 4/148 |
| Pentose Phosphate Pathway                        |  | 2.01E-04 | 18.2 % 2/11 |

| Top Upstream Regulators |  |          |                      |
|-------------------------|--|----------|----------------------|
| Name                    |  | p-value  | Predicted Activation |
| MAPT                    |  | 2.81E-09 |                      |
| MKNK1                   |  | 4.58E-08 |                      |
| APP                     |  | 1.10E-07 |                      |
| BDNF                    |  | 1.61E-07 |                      |
| PSEN1                   |  | 8.83E-07 |                      |

| Top Diseases and Bio Functions                |  |                     |             |
|-----------------------------------------------|--|---------------------|-------------|
| Diseases and Disorders                        |  |                     |             |
| Name                                          |  | p-value range       | # Molecules |
| Neurological Disease                          |  | 2.19E-02 - 8.53E-07 | 24          |
| Organismal Injury and Abnormalities           |  | 2.31E-02 - 8.53E-07 | 42          |
| Developmental Disorder                        |  | 2.12E-02 - 3.20E-05 | 9           |
| Hereditary Disorder                           |  | 2.12E-02 - 3.20E-05 | 20          |
| Infectious Diseases                           |  | 1.93E-02 - 1.19E-04 | 12          |
| Molecular and Cellular Functions              |  |                     |             |
| Name                                          |  | p-value range       | # Molecules |
| Cellular Assembly and Organization            |  | 2.12E-02 - 6.47E-08 | 21          |
| Cellular Function and Maintenance             |  | 2.18E-02 - 6.47E-08 | 27          |
| Molecular Transport                           |  | 2.12E-02 - 2.40E-07 | 22          |
| Cellular Movement                             |  | 2.23E-02 - 7.21E-07 | 16          |
| Cell-To-Cell Signaling and Interaction        |  | 2.12E-02 - 1.54E-06 | 18          |
| Physiological System Development and Function |  |                     |             |
| Name                                          |  | p-value range       | # Molecules |
| Nervous System Development and Function       |  | 2.12E-02 - 3.76E-07 | 21          |
| Tissue Morphology                             |  | 1.75E-02 - 3.76E-07 | 17          |
| Embryonic Development                         |  | 2.12E-02 - 3.69E-05 | 12          |
| Tissue Development                            |  | 2.12E-02 - 3.69E-05 | 19          |
| Organismal Development                        |  | 2.10E-02 - 1.61E-04 | 17          |

| Top Tox Functions                         |  |                     |             |
|-------------------------------------------|--|---------------------|-------------|
| Assays: Clinical Chemistry and Hematology |  |                     |             |
| Name                                      |  | p-value range       | # Molecules |
| Increased Levels of Creatinine            |  | 2.69E-02 - 2.69E-02 | 1           |
| Cardiotoxicity                            |  |                     |             |
| Name                                      |  | p-value range       | # Molecules |
| Congenital Heart Anomaly                  |  | 1.64E-01 - 1.95E-03 | 2           |
| Cardiac Necrosis/Cell Death               |  | 6.96E-02 - 6.96E-02 | 1           |
| Cardiac Arteriopathy                      |  | 1.56E-01 - 1.56E-01 | 2           |
| Cardiac Proliferation                     |  | 1.74E-01 - 1.74E-01 | 1           |
| Cardiac Enlargement                       |  | 4.81E-01 - 1.75E-01 | 3           |
| Hepatotoxicity                            |  |                     |             |
| Name                                      |  | p-value range       | # Molecules |
| Hepatocellular carcinoma                  |  | 1.92E-01 - 2.62E-03 | 8           |
| Liver Hyperplasia/Hyperproliferation      |  | 3.06E-01 - 2.62E-03 | 17          |
| Liver Necrosis/Cell Death                 |  | 9.69E-03 - 9.69E-03 | 1           |
| Liver Fibrosis                            |  | 2.84E-01 - 2.84E-01 | 1           |
| Liver Steatosis                           |  | 5.55E-01 - 5.55E-01 | 1           |
| Nephrotoxicity                            |  |                     |             |
| Name                                      |  | p-value range       | # Molecules |
| Renal Necrosis/Cell Death                 |  | 4.50E-01 - 1.56E-02 | 2           |
| Glomerular Injury                         |  | 1.10E-01 - 2.12E-02 | 2           |
| Renal Damage                              |  | 2.12E-02 - 2.12E-02 | 1           |
| Kidney Failure                            |  | 1.10E-01 - 1.10E-01 | 1           |
| Renal Fibrosis                            |  | 1.10E-01 - 1.10E-01 | 1           |

| Top Networks |                                                                                                      |       |
|--------------|------------------------------------------------------------------------------------------------------|-------|
| ID           | Associated Network Functions                                                                         | Score |
| 1            | Cellular Assembly and Organization, Cellular Function and Maintenance, Cellular Movement             | 47    |
| 2            | Carbohydrate Metabolism, Nucleic Acid Metabolism, Small Molecule Biochemistry                        | 37    |
| 3            | Cell-To-Cell Signaling and Interaction, Nervous System Development and Function, Hereditary Disorder | 16    |

| Top Tox Lists                                                       |  |          |             |
|---------------------------------------------------------------------|--|----------|-------------|
| Name                                                                |  | p-value  | Overlap     |
| Mitochondrial Dysfunction                                           |  | 4.55E-03 | 1.7 % 3/172 |
| Cell Cycle: G2/M DNA Damage Checkpoint Regulation                   |  | 4.61E-03 | 3.8 % 2/52  |
| Glutathione Depletion - CYP Induction and Reactive Metabolites      |  | 2.31E-02 | 8.3 % 1/12  |
| Decreases Respiration of Mitochondria                               |  | 2.69E-02 | 7.1 % 1/14  |
| Decreases Depolarization of Mitochondria and Mitochondrial Membrane |  | 6.05E-02 | 3.1 % 1/32  |
